# Supplementary material for: Paraxial mesoderm organoids model development of human somites
Source: eLife. 2022 Jan 28;11:e68925. doi: 10.7554/eLife.68925 (PMC8906808; doi:10.7554/eLife.68925)
Supplement: Figure 2—source data 1. [file elife-68925-fig2-data1.csv]

File	X	Area	Major	Minor	Angle	Feret	FeretX	FeretY	FeretAngle	MinFeret
C59-500-24_2019-05-06_screen-plate1_Pax3555-Sox2488-phall649-reimage.nd2 [2019-05-06_screen-plate1_Pax3555-Sox2488-phall649-reimage.nd2 (series 07)].ome.tif_DiamQuant.csv	1	70856.537	303.766	296.996	19.978	312.132	318	670	38.948	296.324
C59-500-24_2019-05-06_screen-plate1_Pax3555-Sox2488-phall649-reimage.nd2 [2019-05-06_screen-plate1_Pax3555-Sox2488-phall649-reimage.nd2 (series 08)].ome.tif_DiamQuant.csv	1	84929.445	332.183	325.53	16.582	341.466	306	659	30.674	324.557
C59-500-24_2019-05-06_screen-plate1_Pax3555-Sox2488-phall649-reimage.nd2 [2019-05-06_screen-plate1_Pax3555-Sox2488-phall649-reimage.nd2 (series 09)].ome.tif_DiamQuant.csv	1	80328.253	326.488	313.265	20.679	333.563	293	546	19.494	312.792
CFL-500-24_2019-05-06_screen-plate1_Pax3555-Sox2488-phall649-reimage.nd2 [2019-05-06_screen-plate1_Pax3555-Sox2488-phall649-reimage.nd2 (series 24)].ome.tif_DiamQuant.csv	1	115823.162	392.466	375.754	19.237	403.916	244	563	4.823	378.059
CFL-500-24_2019-05-06_screen-plate1_Pax3555-Sox2488-phall649-reimage.nd2 [2019-05-06_screen-plate1_Pax3555-Sox2488-phall649-reimage.nd2 (series 25)].ome.tif_DiamQuant.csv	1	100209.8	372.334	342.679	162.542	384.748	187	485	172.108	346.594
CFL-500-24_2019-05-06_screen-plate1_Pax3555-Sox2488-phall649-reimage.nd2 [2019-05-06_screen-plate1_Pax3555-Sox2488-phall649-reimage.nd2 (series 26)].ome.tif_DiamQuant.csv	1	105975.726	384.2	351.204	124.661	395.828	452	184	113.999	354.849
PD-500-24_2019-05-06_screen-plate1_Pax3555-Sox2488-phall649-reimage.nd2 [2019-05-06_screen-plate1_Pax3555-Sox2488-phall649-reimage.nd2 (series 01)].ome.tif_DiamQuant.csv	1	69461.625	305.522	289.476	61.563	309.596	381	707	60.154	292.927
PD-500-24_2019-05-06_screen-plate1_Pax3555-Sox2488-phall649-reimage.nd2 [2019-05-06_screen-plate1_Pax3555-Sox2488-phall649-reimage.nd2 (series 02)].ome.tif_DiamQuant.csv	1	74792.11	317.748	299.698	55.928	331.095	418	766	68.845	303.203
PD-500-24_2019-05-06_screen-plate1_Pax3555-Sox2488-phall649-reimage.nd2 [2019-05-06_screen-plate1_Pax3555-Sox2488-phall649-reimage.nd2 (series 03)].ome.tif_DiamQuant.csv	1	65877.647	297.996	281.474	25.107	306.895	295	568	10.389	285.385
PD+C59-500-24_2019-05-06_screen-plate1_Pax3555-Sox2488-phall649-reimage.nd2 [2019-05-06_screen-plate1_Pax3555-Sox2488-phall649-reimage.nd2 (series 12)].ome.tif_DiamQuant.csv	1	81521.067	327.472	316.961	160.995	339.134	312	400	158.001	314.689
PD+C59-500-24_2019-05-06_screen-plate1_Pax3555-Sox2488-phall649-reimage.nd2 [2019-05-06_screen-plate1_Pax3555-Sox2488-phall649-reimage.nd2 (series 13)].ome.tif_DiamQuant.csv	1	76217.475	312.131	310.906	72.755	324.682	295	612	24.977	310.825
PD+C59-500-24_2019-05-06_screen-plate1_Pax3555-Sox2488-phall649-reimage.nd2 [2019-05-06_screen-plate1_Pax3555-Sox2488-phall649-reimage.nd2 (series 14)].ome.tif_DiamQuant.csv	1	82641.9	328.189	320.617	57.204	333.745	501	254	107.547	321.751
PD+XAV-500-24_2019-05-06_screen-plate1_Pax3555-Sox2488-phall649-reimage.nd2 [2019-05-06_screen-plate1_Pax3555-Sox2488-phall649-reimage.nd2 (series 10)].ome.tif_DiamQuant.csv	1	76346.011	327.921	296.433	124.715	332.185	544	245	99.48	295.987
PD+XAV-500-24_2019-05-06_screen-plate1_Pax3555-Sox2488-phall649-reimage.nd2 [2019-05-06_screen-plate1_Pax3555-Sox2488-phall649-reimage.nd2 (series 11)].ome.tif_DiamQuant.csv	1	93065.178	345.599	342.867	121.336	357.943	183	439	173.949	345.182
PD+XAV-500-24_NA.csv	1	70856.537	NA	NA	19.978	312.132	318	670	38.948	296.324
PD+XAV+A83-500-24_2019-05-06_screen-plate1_Pax3555-Sox2488-phall649-reimage.nd2 [2019-05-06_screen-plate1_Pax3555-Sox2488-phall649-reimage.nd2 (series 18)].ome.tif_DiamQuant.csv	1	77787.196	321.233	308.317	176.255	338.39	273	452	170.695	306.151
PD+XAV+A83-500-24_2019-05-06_screen-plate1_Pax3555-Sox2488-phall649-reimage.nd2 [2019-05-06_screen-plate1_Pax3555-Sox2488-phall649-reimage.nd2 (series 19)].ome.tif_DiamQuant.csv	1	78915.939	318.824	315.155	25.848	332.718	289	369	161.942	314.082
PD+XAV+A83-500-24_2019-05-06_screen-plate1_Pax3555-Sox2488-phall649-reimage.nd2 [2019-05-06_screen-plate1_Pax3555-Sox2488-phall649-reimage.nd2 (series 20)].ome.tif_DiamQuant.csv	1	81268.345	323.948	319.416	135.039	331.154	493	237	95.667	320.69
PD+XAV+A83+LDN-500-24_2019-05-06_screen-plate1_Pax3555-Sox2488-phall649-reimage.nd2 [2019-05-06_screen-plate1_Pax3555-Sox2488-phall649-reimage.nd2 (series 21)].ome.tif_DiamQuant.csv	1	71665.325	306.592	297.617	112.131	326.977	410	263	122.192	299.079
PD+XAV+A83+LDN-500-24_2019-05-06_screen-plate1_Pax3555-Sox2488-phall649-reimage.nd2 [2019-05-06_screen-plate1_Pax3555-Sox2488-phall649-reimage.nd2 (series 22)].ome.tif_DiamQuant.csv	1	93749.78	350.83	340.239	40.005	359.84	345	710	48.117	340.432
PD+XAV+A83+LDN-500-24_2019-05-06_screen-plate1_Pax3555-Sox2488-phall649-reimage.nd2 [2019-05-06_screen-plate1_Pax3555-Sox2488-phall649-reimage.nd2 (series 23)].ome.tif_DiamQuant.csv	1	85419.859	341.968	318.041	102.436	347.95	426	244	109.974	319.712
PD+XAV+LDN-500-24_2019-05-06_screen-plate1_Pax3555-Sox2488-phall649-reimage.nd2 [2019-05-06_screen-plate1_Pax3555-Sox2488-phall649-reimage.nd2 (series 15)].ome.tif_DiamQuant.csv	1	75590.615	316.464	304.126	144.044	332.618	299	400	148.925	304.167
PD+XAV+LDN-500-24_2019-05-06_screen-plate1_Pax3555-Sox2488-phall649-reimage.nd2 [2019-05-06_screen-plate1_Pax3555-Sox2488-phall649-reimage.nd2 (series 16)].ome.tif_DiamQuant.csv	1	70800.377	313.926	287.157	158.448	324.13	262	461	166.422	285.968
PD+XAV+LDN-500-24_2019-05-06_screen-plate1_Pax3555-Sox2488-phall649-reimage.nd2 [2019-05-06_screen-plate1_Pax3555-Sox2488-phall649-reimage.nd2 (series 17)].ome.tif_DiamQuant.csv	1	83014.852	337.272	313.39	160.864	350.433	324	365	146.937	310.58
XAV-500-24_2019-05-06_screen-plate1_Pax3555-Sox2488-phall649-reimage.nd2 [2019-05-06_screen-plate1_Pax3555-Sox2488-phall649-reimage.nd2 (series 04)].ome.tif_DiamQuant.csv	1	98816.075	374.719	335.763	75.885	384.075	414	776	70.586	338.589
XAV-500-24_2019-05-06_screen-plate1_Pax3555-Sox2488-phall649-reimage.nd2 [2019-05-06_screen-plate1_Pax3555-Sox2488-phall649-reimage.nd2 (series 05)].ome.tif_DiamQuant.csv	1	81798.704	334.735	311.14	116.829	342.312	405	288	122.318	311.118
XAV-500-24_2019-05-06_screen-plate1_Pax3555-Sox2488-phall649-reimage.nd2 [2019-05-06_screen-plate1_Pax3555-Sox2488-phall649-reimage.nd2 (series 06)].ome.tif_DiamQuant.csv	1	77484.247	321.802	306.574	161.036	331.908	244	486	173.144	309.229
C59-1000-24_2019-05-06_screen-plate1_Pax3555-Sox2488-phall649-reimage.nd2 [2019-05-06_screen-plate1_Pax3555-Sox2488-phall649-reimage.nd2 (series 31)].ome.tif_DiamQuant.csv	1	114380	400.337	363.777	174.748	406.832	244	496	170.479	367.897
C59-1000-24_2019-05-06_screen-plate1_Pax3555-Sox2488-phall649-reimage.nd2 [2019-05-06_screen-plate1_Pax3555-Sox2488-phall649-reimage.nd2 (series 32)].ome.tif_DiamQuant.csv	1	134249.682	424.754	402.426	93.047	463.795	439	915	55.944	396.826
C59-1000-24_NA.csv	1	114380	NA	NA	174.748	406.832	244	496	170.479	367.897
CFL-1000-24_2019-05-06_screen-plate1_Pax3555-Sox2488-phall649-reimage.nd2 [2019-05-06_screen-plate1_Pax3555-Sox2488-phall649-reimage.nd2 (series 45)].ome.tif_DiamQuant.csv	1	132401.929	419.95	401.427	21.602	425.351	233	422	170.983	400.576
CFL-1000-24_2019-05-06_screen-plate1_Pax3555-Sox2488-phall649-reimage.nd2 [2019-05-06_screen-plate1_Pax3555-Sox2488-phall649-reimage.nd2 (series 46)].ome.tif_DiamQuant.csv	1	141427.131	428.948	419.796	3.338	443.556	243	305	152.745	420.972
CFL-1000-24_2019-05-06_screen-plate1_Pax3555-Sox2488-phall649-reimage.nd2 [2019-05-06_screen-plate1_Pax3555-Sox2488-phall649-reimage.nd2 (series 47)].ome.tif_DiamQuant.csv	1	149299.464	446.804	425.453	145.761	458.612	232	288	149.602	421.025
PD-1000-24_2019-05-06_screen-plate1_Pax3555-Sox2488-phall649-reimage.nd2 [2019-05-06_screen-plate1_Pax3555-Sox2488-phall649-reimage.nd2 (series 27)].ome.tif_DiamQuant.csv	1	104494.991	373.47	356.246	145.734	379.588	292	365	159.133	356.227
PD-1000-24_2019-05-06_screen-plate1_Pax3555-Sox2488-phall649-reimage.nd2 [2019-05-06_screen-plate1_Pax3555-Sox2488-phall649-reimage.nd2 (series 28)].ome.tif_DiamQuant.csv	1	115006.465	388.643	376.774	80.278	395.768	424	766	65.797	375.843
PD-1000-24_NA.csv	1	114380	NA	NA	174.748	406.832	244	496	170.479	367.897
PD+C59-1000-24_2019-05-06_screen-plate1_Pax3555-Sox2488-phall649-reimage.nd2 [2019-05-06_screen-plate1_Pax3555-Sox2488-phall649-reimage.nd2 (series 36)].ome.tif_DiamQuant.csv	1	107932.241	381.893	359.848	23.07	388.968	232	506	177.683	357.348
PD+C59-1000-24_2019-05-06_screen-plate1_Pax3555-Sox2488-phall649-reimage.nd2 [2019-05-06_screen-plate1_Pax3555-Sox2488-phall649-reimage.nd2 (series 37)].ome.tif_DiamQuant.csv	1	102852.104	364.429	359.344	65.706	374.535	393	764	57.271	359.139
PD+C59-1000-24_NA.csv	1	114380	NA	NA	174.748	406.832	244	496	170.479	367.897
PD+XAV-1000-24_2019-05-06_screen-plate1_Pax3555-Sox2488-phall649-reimage.nd2 [2019-05-06_screen-plate1_Pax3555-Sox2488-phall649-reimage.nd2 (series 33)].ome.tif_DiamQuant.csv	1	109679.143	378.673	368.782	95.631	389.536	361	744	57.259	366.727
PD+XAV-1000-24_2019-05-06_screen-plate1_Pax3555-Sox2488-phall649-reimage.nd2 [2019-05-06_screen-plate1_Pax3555-Sox2488-phall649-reimage.nd2 (series 34)].ome.tif_DiamQuant.csv	1	111042.811	412.361	342.865	67.862	469.815	372	781	62.063	359.483
PD+XAV-1000-24_2019-05-06_screen-plate1_Pax3555-Sox2488-phall649-reimage.nd2 [2019-05-06_screen-plate1_Pax3555-Sox2488-phall649-reimage.nd2 (series 35)].ome.tif_DiamQuant.csv	1	93686.501	350.453	340.375	110.325	359.975	262	407	163.56	342.779
PD+XAV+A83-1000-24_2019-05-06_screen-plate1_Pax3555-Sox2488-phall649-reimage.nd2 [2019-05-06_screen-plate1_Pax3555-Sox2488-phall649-reimage.nd2 (series 40)].ome.tif_DiamQuant.csv	1	106080.532	371.461	363.607	127.301	388.23	393	212	109.198	363.624
PD+XAV+A83-1000-24_2019-05-06_screen-plate1_Pax3555-Sox2488-phall649-reimage.nd2 [2019-05-06_screen-plate1_Pax3555-Sox2488-phall649-reimage.nd2 (series 41)].ome.tif_DiamQuant.csv	1	117076.882	404.391	368.621	146.375	418.809	189	307	141.891	373.724
PD+XAV+A83-1000-24_2019-05-06_screen-plate1_Pax3555-Sox2488-phall649-reimage.nd2 [2019-05-06_screen-plate1_Pax3555-Sox2488-phall649-reimage.nd2 (series 42)].ome.tif_DiamQuant.csv	1	105459.604	377.091	356.082	118.944	384.816	336	293	133.345	358.801
PD+XAV+A83+LDN-1000-24_2019-05-06_screen-plate1_Pax3555-Sox2488-phall649-reimage.nd2 [2019-05-06_screen-plate1_Pax3555-Sox2488-phall649-reimage.nd2 (series 43)].ome.tif_DiamQuant.csv	1	216375.857	NA	374.022	38.008	711.119	142	915	40.876	371.181
PD+XAV+A83+LDN-1000-24_2019-05-06_screen-plate1_Pax3555-Sox2488-phall649-reimage.nd2 [2019-05-06_screen-plate1_Pax3555-Sox2488-phall649-reimage.nd2 (series 44)].ome.tif_DiamQuant.csv	1	117951.322	402.183	373.412	141.687	408.332	266	348	146.75	374.964
PD+XAV+A83+LDN-1000-24_NA.csv	1	114380	NA	NA	174.748	406.832	244	496	170.479	367.897
PD+XAV+LDN-1000-24_2019-05-06_screen-plate1_Pax3555-Sox2488-phall649-reimage.nd2 [2019-05-06_screen-plate1_Pax3555-Sox2488-phall649-reimage.nd2 (series 38)].ome.tif_DiamQuant.csv	1	113136.168	384.694	374.452	111.881	391.621	581	152	92.761	374.732
PD+XAV+LDN-1000-24_2019-05-06_screen-plate1_Pax3555-Sox2488-phall649-reimage.nd2 [2019-05-06_screen-plate1_Pax3555-Sox2488-phall649-reimage.nd2 (series 39)].ome.tif_DiamQuant.csv	1	114414.408	383.795	379.569	70.311	398.499	442	761	47.878	377.186
PD+XAV+LDN-1000-24_NA.csv	1	114380	NA	NA	174.748	406.832	244	496	170.479	367.897
XAV-1000-24_2019-05-06_screen-plate1_Pax3555-Sox2488-phall649-reimage.nd2 [2019-05-06_screen-plate1_Pax3555-Sox2488-phall649-reimage.nd2 (series 29)].ome.tif_DiamQuant.csv	1	112301.673	397.099	360.079	126.447	412.547	318	282	130.611	366.154
XAV-1000-24_2019-05-06_screen-plate1_Pax3555-Sox2488-phall649-reimage.nd2 [2019-05-06_screen-plate1_Pax3555-Sox2488-phall649-reimage.nd2 (series 30)].ome.tif_DiamQuant.csv	1	109802.933	381.844	366.132	127.126	390.665	284	374	153.93	366.699
XAV-1000-24_NA.csv	1	114380	NA	NA	174.748	406.832	244	496	170.479	367.897
C59-500-48_2019-05-08_screen-plate2_Pax3555-Sox2488-phall64.nd2 [2019-05-08_screen-plate2_Pax3555-Sox2488-phall64.nd2 (series 08)].ome.tif_DiamQuant.csv	1	77130.278	321.408	305.547	179.718	324.379	336	351	143.197	304.119
C59-500-48_2019-05-08_screen-plate2_Pax3555-Sox2488-phall64.nd2 [2019-05-08_screen-plate2_Pax3555-Sox2488-phall64.nd2 (series 09)].ome.tif_DiamQuant.csv	1	75169.808	319.124	299.912	50.038	329.3	327	652	36.301	303.271
C59-500-48_2019-05-08_screen-plate2_Pax3555-Sox2488-phall64.nd2 [2019-05-08_screen-plate2_Pax3555-Sox2488-phall64.nd2 (series 10)].ome.tif_DiamQuant.csv	1	81029.071	389.725	264.724	44.65	598.488	0	897	34.425	307.457
CFL-500-48_2019-05-08_screen-plate2_Pax3555-Sox2488-phall647_part2.nd2 [2019-05-08_screen-plate2_Pax3555-Sox2488-phall647_part2.nd2 (series 01)].ome.tif_DiamQuant.csv	1	138890.424	436.034	405.566	108.487	454.185	249	211	121.467	412.529
CFL-500-48_2019-05-08_screen-plate2_Pax3555-Sox2488-phall647_part2.nd2 [2019-05-08_screen-plate2_Pax3555-Sox2488-phall647_part2.nd2 (series 03)].ome.tif_DiamQuant.csv	1	152363.761	445.375	435.578	0.323	466.234	115	361	167.22	437.156
CFL-500-48_2019-05-08_screen-plate2_Pax3555-Sox2488-phall647_part2.nd2 [2019-05-08_screen-plate2_Pax3555-Sox2488-phall647_part2.nd2 (series 04)].ome.tif_DiamQuant.csv	1	160848.321	487.661	419.96	33.196	493.613	124	732	24.541	420.936
PD-500-48_2019-05-08_screen-plate2_Pax3555-Sox2488-phall64.nd2 [2019-05-08_screen-plate2_Pax3555-Sox2488-phall64.nd2 (series 01)].ome.tif_DiamQuant.csv	1	62111.345	282.353	280.084	176.092	289.82	458	712	70.346	280.5
PD-500-48_2019-05-08_screen-plate2_Pax3555-Sox2488-phall64.nd2 [2019-05-08_screen-plate2_Pax3555-Sox2488-phall64.nd2 (series 02)].ome.tif_DiamQuant.csv	1	62555.091	288.577	276.002	88.295	298.911	472	730	69.43	275.497
PD-500-48_NA.csv	1	70856.537	NA	NA	19.978	312.132	318	670	38.948	296.324
PD+C59-500-48_2019-05-08_screen-plate2_Pax3555-Sox2488-phall64.nd2 [2019-05-08_screen-plate2_Pax3555-Sox2488-phall64.nd2 (series 15)].ome.tif_DiamQuant.csv	1	60317.774	281.451	272.868	43.794	288.706	443	732	67.457	273.69
PD+C59-500-48_2019-05-08_screen-plate2_Pax3555-Sox2488-phall64.nd2 [2019-05-08_screen-plate2_Pax3555-Sox2488-phall64.nd2 (series 16)].ome.tif_DiamQuant.csv	1	60197.939	286.957	267.101	112.189	291.933	451	284	101.431	266.31
PD+C59-500-48_2019-05-08_screen-plate2_Pax3555-Sox2488-phall64.nd2 [2019-05-08_screen-plate2_Pax3555-Sox2488-phall64.nd2 (series 17)].ome.tif_DiamQuant.csv	1	63238.507	289.366	278.256	165.421	303.953	328	405	151.314	281.497
PD+XAV-500-48_2019-05-08_screen-plate2_Pax3555-Sox2488-phall64.nd2 [2019-05-08_screen-plate2_Pax3555-Sox2488-phall64.nd2 (series 12)].ome.tif_DiamQuant.csv	1	66926.896	295.671	288.205	70.081	308.287	387	673	52.709	287.604
PD+XAV-500-48_2019-05-08_screen-plate2_Pax3555-Sox2488-phall64.nd2 [2019-05-08_screen-plate2_Pax3555-Sox2488-phall64.nd2 (series 13)].ome.tif_DiamQuant.csv	1	60785.25	285.726	270.868	134.506	294.009	318	366	148.826	271.297
PD+XAV-500-48_2019-05-08_screen-plate2_Pax3555-Sox2488-phall64.nd2 [2019-05-08_screen-plate2_Pax3555-Sox2488-phall64.nd2 (series 14)].ome.tif_DiamQuant.csv	1	62236.322	290.105	273.149	38.38	294.579	241	570	31.824	275.707
PD+XAV+A83-500-48_2019-05-08_screen-plate2_Pax3555-Sox2488-phall64.nd2 [2019-05-08_screen-plate2_Pax3555-Sox2488-phall64.nd2 (series 23)].ome.tif_DiamQuant.csv	1	68082.138	300.229	288.729	144.726	305.268	351	388	151.851	288.055
PD+XAV+A83-500-48_2019-05-08_screen-plate2_Pax3555-Sox2488-phall64.nd2 [2019-05-08_screen-plate2_Pax3555-Sox2488-phall64.nd2 (series 24)].ome.tif_DiamQuant.csv	1	66395.746	296.171	285.436	64.547	303.905	463	702	65.291	286.773
PD+XAV+A83-500-48_2019-05-08_screen-plate2_Pax3555-Sox2488-phall64.nd2 [2019-05-08_screen-plate2_Pax3555-Sox2488-phall64.nd2 (series 25)].ome.tif_DiamQuant.csv	1	67734.893	297.549	289.844	143.937	304.084	366	398	141.803	289.522
PD+XAV+A83+LDN-500-48_2019-05-08_screen-plate2_Pax3555-Sox2488-phall64.nd2 [2019-05-08_screen-plate2_Pax3555-Sox2488-phall64.nd2 (series 28)].ome.tif_DiamQuant.csv	1	68919.006	299.247	293.237	63.495	305.98	418	712	50.421	290.717
PD+XAV+A83+LDN-500-48_2019-05-08_screen-plate2_Pax3555-Sox2488-phall64.nd2 [2019-05-08_screen-plate2_Pax3555-Sox2488-phall64.nd2 (series 29)].ome.tif_DiamQuant.csv	1	65172.083	295.232	281.066	137.88	297.81	334	452	163.057	283.572
PD+XAV+A83+LDN-500-48_2019-05-08_screen-plate2_Pax3555-Sox2488-phall64.nd2 [2019-05-08_screen-plate2_Pax3555-Sox2488-phall64.nd2 (series 30)].ome.tif_DiamQuant.csv	1	65234.572	295.331	281.241	137.899	305.025	348	351	142.539	283.337
PD+XAV+LDN-500-48_2019-05-08_screen-plate2_Pax3555-Sox2488-phall64.nd2 [2019-05-08_screen-plate2_Pax3555-Sox2488-phall64.nd2 (series 19)].ome.tif_DiamQuant.csv	1	62066.655	282.899	279.342	29.197	291.095	296	561	8.323	278.004
PD+XAV+LDN-500-48_2019-05-08_screen-plate2_Pax3555-Sox2488-phall64.nd2 [2019-05-08_screen-plate2_Pax3555-Sox2488-phall64.nd2 (series 21)].ome.tif_DiamQuant.csv	1	67439.458	300.419	285.823	126.651	309.003	304	428	156.618	283.708
PD+XAV+LDN-500-48_2019-05-08_screen-plate2_Pax3555-Sox2488-phall64.nd2 [2019-05-08_screen-plate2_Pax3555-Sox2488-phall64.nd2 (series 22)].ome.tif_DiamQuant.csv	1	68370.454	300.927	289.279	19.822	306.674	385	638	37.669	287.849
XAV-500-48_2019-05-08_screen-plate2_Pax3555-Sox2488-phall64.nd2 [2019-05-08_screen-plate2_Pax3555-Sox2488-phall64.nd2 (series 03)].ome.tif_DiamQuant.csv	1	75583.101	312.329	308.121	166.186	317.586	303	535	11.421	308.593
XAV-500-48_2019-05-08_screen-plate2_Pax3555-Sox2488-phall64.nd2 [2019-05-08_screen-plate2_Pax3555-Sox2488-phall64.nd2 (series 05)].ome.tif_DiamQuant.csv	1	71104.908	302.601	299.185	14.51	313.869	402	297	129.879	296.472
XAV-500-48_2019-05-08_screen-plate2_Pax3555-Sox2488-phall64.nd2 [2019-05-08_screen-plate2_Pax3555-Sox2488-phall64.nd2 (series 06)].ome.tif_DiamQuant.csv	1	64402.845	294.656	278.291	131.136	303.654	359	314	132.146	280.462
C59-1000-48_2019-05-08_screen-plate2_Pax3555-Sox2488-phall647_part2_rei.nd2 [2019-05-08_screen-plate2_Pax3555-Sox2488-phall647_part2_rei.nd2 (series 05)].ome.tif_DiamQuant.csv	1	116845.518	390.422	381.055	59.04	398.223	285	702	40.709	377.411
C59-1000-48_2019-05-08_screen-plate2_Pax3555-Sox2488-phall647_part2_rei.nd2 [2019-05-08_screen-plate2_Pax3555-Sox2488-phall647_part2_rei.nd2 (series 06)].ome.tif_DiamQuant.csv	1	121575.246	398.385	388.555	116.131	401.874	471	847	74.572	387.316
C59-1000-48_NA.csv	1	114380	NA	NA	174.748	406.832	244	496	170.479	367.897
CFL-1000-48_2019-05-08_screen-plate2_Pax3555-Sox2488-phall647_part2_rei.nd2 [2019-05-08_screen-plate2_Pax3555-Sox2488-phall647_part2_rei.nd2 (series 20)].ome.tif_DiamQuant.csv	1	181075.136	494.687	466.056	39.778	507.408	227	840	56.783	469.465
CFL-1000-48_2019-05-08_screen-plate2_Pax3555-Sox2488-phall647_part2_rei.nd2 [2019-05-08_screen-plate2_Pax3555-Sox2488-phall647_part2_rei.nd2 (series 21)].ome.tif_DiamQuant.csv	1	197383.779	513.242	489.665	47.74	525.593	410	924	79.591	491.313
CFL-1000-48_2019-05-08_screen-plate2_Pax3555-Sox2488-phall647_part2_rei.nd2 [2019-05-08_screen-plate2_Pax3555-Sox2488-phall647_part2_rei.nd2 (series 22)].ome.tif_DiamQuant.csv	1	207141.833	524.001	503.321	125.274	539.044	356	79	104.458	502.559
PD-1000-48_2019-05-08_screen-plate2_Pax3555-Sox2488-phall647_part2_rei.nd2 [2019-05-08_screen-plate2_Pax3555-Sox2488-phall647_part2_rei.nd2 (series 01)].ome.tif_DiamQuant.csv	1	86260.287	340.986	322.095	15.778	350.47	179	580	7.112	322.109
PD-1000-48_2019-05-08_screen-plate2_Pax3555-Sox2488-phall647_part2_rei.nd2 [2019-05-08_screen-plate2_Pax3555-Sox2488-phall647_part2_rei.nd2 (series 02)].ome.tif_DiamQuant.csv	1	92645.162	347.75	339.208	47.154	352.108	115	561	4.713	339.119
PD-1000-48_NA.csv	1	114380	NA	NA	174.748	406.832	244	496	170.479	367.897
PD+C59-1000-48_2019-05-08_screen-plate2_Pax3555-Sox2488-phall647_part2_rei.nd2 [2019-05-08_screen-plate2_Pax3555-Sox2488-phall647_part2_rei.nd2 (series 09)].ome.tif_DiamQuant.csv	1	91881.065	348.077	336.094	74.405	358.186	375	812	68.796	337.305
PD+C59-1000-48_2019-05-08_screen-plate2_Pax3555-Sox2488-phall647_part2_rei.nd2 [2019-05-08_screen-plate2_Pax3555-Sox2488-phall647_part2_rei.nd2 (series 10)].ome.tif_DiamQuant.csv	1	99110.719	366.415	344.396	43.812	381.648	96	451	34.188	346.693
PD+C59-1000-48_NA.csv	1	114380	NA	NA	174.748	406.832	244	496	170.479	367.897
PD+XAV-1000-48_2019-05-08_screen-plate2_Pax3555-Sox2488-phall647_part2_rei.nd2 [2019-05-08_screen-plate2_Pax3555-Sox2488-phall647_part2_rei.nd2 (series 07)].ome.tif_DiamQuant.csv	1	106640.553	373.974	363.071	28.651	379.579	143	755	41.507	363.308
PD+XAV-1000-48_2019-05-08_screen-plate2_Pax3555-Sox2488-phall647_part2_rei.nd2 [2019-05-08_screen-plate2_Pax3555-Sox2488-phall647_part2_rei.nd2 (series 08)].ome.tif_DiamQuant.csv	1	91782.983	355.368	328.847	127.894	360.368	388	253	108.941	326.863
PD+XAV-1000-48_NA.csv	1	114380	NA	NA	174.748	406.832	244	496	170.479	367.897
PD+XAV+A83-1000-48_2019-05-08_screen-plate2_Pax3555-Sox2488-phall647_part2_rei.nd2 [2019-05-08_screen-plate2_Pax3555-Sox2488-phall647_part2_rei.nd2 (series 14)].ome.tif_DiamQuant.csv	1	102975.103	364.065	360.134	70	374.321	249	412	168.86	357.765
PD+XAV+A83-1000-48_2019-05-08_screen-plate2_Pax3555-Sox2488-phall647_part2_rei.nd2 [2019-05-08_screen-plate2_Pax3555-Sox2488-phall647_part2_rei.nd2 (series 15)].ome.tif_DiamQuant.csv	1	97228.161	360.347	343.543	63.186	366.739	437	793	74.891	345.177
PD+XAV+A83-1000-48_2019-05-08_screen-plate2_Pax3555-Sox2488-phall647_part2_rei.nd2 [2019-05-08_screen-plate2_Pax3555-Sox2488-phall647_part2_rei.nd2 (series 16)].ome.tif_DiamQuant.csv	1	107473.071	373.978	365.901	64.827	381.892	443	834	68.759	365.711
PD+XAV+A83+LDN-1000-48_2019-05-08_screen-plate2_Pax3555-Sox2488-phall647_part2_rei.nd2 [2019-05-08_screen-plate2_Pax3555-Sox2488-phall647_part2_rei.nd2 (series 17)].ome.tif_DiamQuant.csv	1	104931.618	377.994	353.453	139.84	379.905	257	369	148.125	351.165
PD+XAV+A83+LDN-1000-48_2019-05-08_screen-plate2_Pax3555-Sox2488-phall647_part2_rei.nd2 [2019-05-08_screen-plate2_Pax3555-Sox2488-phall647_part2_rei.nd2 (series 18)].ome.tif_DiamQuant.csv	1	102647.238	365.845	357.24	40.811	367.628	288	705	38.262	357.351
PD+XAV+A83+LDN-1000-48_2019-05-08_screen-plate2_Pax3555-Sox2488-phall647_part2_rei.nd2 [2019-05-08_screen-plate2_Pax3555-Sox2488-phall647_part2_rei.nd2 (series 19)].ome.tif_DiamQuant.csv	1	101624.882	370.533	349.207	171.826	380.472	249	386	158.269	351.45
PD+XAV+LDN-1000-48_2019-05-08_screen-plate2_Pax3555-Sox2488-phall647_part2_rei.nd2 [2019-05-08_screen-plate2_Pax3555-Sox2488-phall647_part2_rei.nd2 (series 11)].ome.tif_DiamQuant.csv	1	96543.955	357.28	344.053	87.856	359.872	172	237	112.936	340.956
PD+XAV+LDN-1000-48_2019-05-08_screen-plate2_Pax3555-Sox2488-phall647_part2_rei.nd2 [2019-05-08_screen-plate2_Pax3555-Sox2488-phall647_part2_rei.nd2 (series 12)].ome.tif_DiamQuant.csv	1	95565.104	356.597	341.218	113.907	364.847	340	270	119.083	341.59
PD+XAV+LDN-1000-48_2019-05-08_screen-plate2_Pax3555-Sox2488-phall647_part2_rei.nd2 [2019-05-08_screen-plate2_Pax3555-Sox2488-phall647_part2_rei.nd2 (series 13)].ome.tif_DiamQuant.csv	1	99510.169	363.373	348.679	106.106	379.493	376	200	129.891	349.031
XAV-1000-48_2019-05-08_screen-plate2_Pax3555-Sox2488-phall647_part2_rei.nd2 [2019-05-08_screen-plate2_Pax3555-Sox2488-phall647_part2_rei.nd2 (series 03)].ome.tif_DiamQuant.csv	1	115632.534	395.332	372.416	11.176	408.088	94	614	8.954	376.842
XAV-1000-48_2019-05-08_screen-plate2_Pax3555-Sox2488-phall647_part2_rei.nd2 [2019-05-08_screen-plate2_Pax3555-Sox2488-phall647_part2_rei.nd2 (series 04)].ome.tif_DiamQuant.csv	1	118533.887	398.861	378.383	109.95	404.292	283	263	126.014	377.606
XAV-1000-48_NA.csv	1	114380	NA	NA	174.748	406.832	244	496	170.479	367.897
