# Supplementary material for: Paraxial mesoderm organoids model development of human somites
Source: eLife. 2022 Jan 28;11:e68925. doi: 10.7554/eLife.68925 (PMC8906808; doi:10.7554/eLife.68925)
Supplement: Figure 2—source data 2. [file elife-68925-fig2-data2.csv]

File	Means	SD
C59-500-24_2019-05-06_screen-plate1_Pax3555-Sox2488-phall649-reimage.nd2 [2019-05-06_screen-plate1_Pax3555-Sox2488-phall649-reimage.nd2 (series 07)].ome.tif_Pax3Quant.csv	1.274	0.140953773
C59-500-24_2019-05-06_screen-plate1_Pax3555-Sox2488-phall649-reimage.nd2 [2019-05-06_screen-plate1_Pax3555-Sox2488-phall649-reimage.nd2 (series 08)].ome.tif_Pax3Quant.csv	1.2949	0.144696374
C59-500-24_2019-05-06_screen-plate1_Pax3555-Sox2488-phall649-reimage.nd2 [2019-05-06_screen-plate1_Pax3555-Sox2488-phall649-reimage.nd2 (series 09)].ome.tif_Pax3Quant.csv	1.312783333	0.121750243
CFL-500-24_2019-05-06_screen-plate1_Pax3555-Sox2488-phall649-reimage.nd2 [2019-05-06_screen-plate1_Pax3555-Sox2488-phall649-reimage.nd2 (series 24)].ome.tif_Pax3Quant.csv	0.52155	0.022154638
CFL-500-24_2019-05-06_screen-plate1_Pax3555-Sox2488-phall649-reimage.nd2 [2019-05-06_screen-plate1_Pax3555-Sox2488-phall649-reimage.nd2 (series 25)].ome.tif_Pax3Quant.csv	0.538833333	0.0741147
CFL-500-24_2019-05-06_screen-plate1_Pax3555-Sox2488-phall649-reimage.nd2 [2019-05-06_screen-plate1_Pax3555-Sox2488-phall649-reimage.nd2 (series 26)].ome.tif_Pax3Quant.csv	0.55545	0.013432095
PD-500-24_2019-05-06_screen-plate1_Pax3555-Sox2488-phall649-reimage.nd2 [2019-05-06_screen-plate1_Pax3555-Sox2488-phall649-reimage.nd2 (series 01)].ome.tif_Pax3Quant.csv	1.43195	0.123352798
PD-500-24_2019-05-06_screen-plate1_Pax3555-Sox2488-phall649-reimage.nd2 [2019-05-06_screen-plate1_Pax3555-Sox2488-phall649-reimage.nd2 (series 02)].ome.tif_Pax3Quant.csv	1.5747	0.236433765
PD-500-24_2019-05-06_screen-plate1_Pax3555-Sox2488-phall649-reimage.nd2 [2019-05-06_screen-plate1_Pax3555-Sox2488-phall649-reimage.nd2 (series 03)].ome.tif_Pax3Quant.csv	1.348683333	0.205843572
PD+C59-500-24_2019-05-06_screen-plate1_Pax3555-Sox2488-phall649-reimage.nd2 [2019-05-06_screen-plate1_Pax3555-Sox2488-phall649-reimage.nd2 (series 12)].ome.tif_Pax3Quant.csv	1.500416667	0.101233292
PD+C59-500-24_2019-05-06_screen-plate1_Pax3555-Sox2488-phall649-reimage.nd2 [2019-05-06_screen-plate1_Pax3555-Sox2488-phall649-reimage.nd2 (series 13)].ome.tif_Pax3Quant.csv	1.549383333	0.114727546
PD+C59-500-24_2019-05-06_screen-plate1_Pax3555-Sox2488-phall649-reimage.nd2 [2019-05-06_screen-plate1_Pax3555-Sox2488-phall649-reimage.nd2 (series 14)].ome.tif_Pax3Quant.csv	1.497983333	0.11033777
PD+XAV-500-24_2019-05-06_screen-plate1_Pax3555-Sox2488-phall649-reimage.nd2 [2019-05-06_screen-plate1_Pax3555-Sox2488-phall649-reimage.nd2 (series 10)].ome.tif_Pax3Quant.csv	1.36695	0.095319698
PD+XAV-500-24_2019-05-06_screen-plate1_Pax3555-Sox2488-phall649-reimage.nd2 [2019-05-06_screen-plate1_Pax3555-Sox2488-phall649-reimage.nd2 (series 11)].ome.tif_Pax3Quant.csv	1.54485	0.094393842
PD+XAV-500-24_NA.csv	NA	NA
PD+XAV+A83-500-24_2019-05-06_screen-plate1_Pax3555-Sox2488-phall649-reimage.nd2 [2019-05-06_screen-plate1_Pax3555-Sox2488-phall649-reimage.nd2 (series 18)].ome.tif_Pax3Quant.csv	1.480433333	0.112549253
PD+XAV+A83-500-24_2019-05-06_screen-plate1_Pax3555-Sox2488-phall649-reimage.nd2 [2019-05-06_screen-plate1_Pax3555-Sox2488-phall649-reimage.nd2 (series 19)].ome.tif_Pax3Quant.csv	1.544233333	0.028458931
PD+XAV+A83-500-24_2019-05-06_screen-plate1_Pax3555-Sox2488-phall649-reimage.nd2 [2019-05-06_screen-plate1_Pax3555-Sox2488-phall649-reimage.nd2 (series 20)].ome.tif_Pax3Quant.csv	1.436733333	0.097961747
PD+XAV+A83+LDN-500-24_2019-05-06_screen-plate1_Pax3555-Sox2488-phall649-reimage.nd2 [2019-05-06_screen-plate1_Pax3555-Sox2488-phall649-reimage.nd2 (series 21)].ome.tif_Pax3Quant.csv	1.329416667	0.130430096
PD+XAV+A83+LDN-500-24_2019-05-06_screen-plate1_Pax3555-Sox2488-phall649-reimage.nd2 [2019-05-06_screen-plate1_Pax3555-Sox2488-phall649-reimage.nd2 (series 22)].ome.tif_Pax3Quant.csv	1.443066667	0.061758103
PD+XAV+A83+LDN-500-24_2019-05-06_screen-plate1_Pax3555-Sox2488-phall649-reimage.nd2 [2019-05-06_screen-plate1_Pax3555-Sox2488-phall649-reimage.nd2 (series 23)].ome.tif_Pax3Quant.csv	1.534216667	0.069527971
PD+XAV+LDN-500-24_2019-05-06_screen-plate1_Pax3555-Sox2488-phall649-reimage.nd2 [2019-05-06_screen-plate1_Pax3555-Sox2488-phall649-reimage.nd2 (series 15)].ome.tif_Pax3Quant.csv	1.366066667	0.146269297
PD+XAV+LDN-500-24_2019-05-06_screen-plate1_Pax3555-Sox2488-phall649-reimage.nd2 [2019-05-06_screen-plate1_Pax3555-Sox2488-phall649-reimage.nd2 (series 16)].ome.tif_Pax3Quant.csv	1.381983333	0.146191016
PD+XAV+LDN-500-24_2019-05-06_screen-plate1_Pax3555-Sox2488-phall649-reimage.nd2 [2019-05-06_screen-plate1_Pax3555-Sox2488-phall649-reimage.nd2 (series 17)].ome.tif_Pax3Quant.csv	1.500683333	0.059338298
XAV-500-24_2019-05-06_screen-plate1_Pax3555-Sox2488-phall649-reimage.nd2 [2019-05-06_screen-plate1_Pax3555-Sox2488-phall649-reimage.nd2 (series 04)].ome.tif_Pax3Quant.csv	1.234183333	0.078320613
XAV-500-24_2019-05-06_screen-plate1_Pax3555-Sox2488-phall649-reimage.nd2 [2019-05-06_screen-plate1_Pax3555-Sox2488-phall649-reimage.nd2 (series 05)].ome.tif_Pax3Quant.csv	1.275966667	0.145185908
XAV-500-24_2019-05-06_screen-plate1_Pax3555-Sox2488-phall649-reimage.nd2 [2019-05-06_screen-plate1_Pax3555-Sox2488-phall649-reimage.nd2 (series 06)].ome.tif_Pax3Quant.csv	1.174416667	0.118694636
C59-1000-24_2019-05-06_screen-plate1_Pax3555-Sox2488-phall649-reimage.nd2 [2019-05-06_screen-plate1_Pax3555-Sox2488-phall649-reimage.nd2 (series 31)].ome.tif_Pax3Quant.csv	1.297933333	0.061139426
C59-1000-24_2019-05-06_screen-plate1_Pax3555-Sox2488-phall649-reimage.nd2 [2019-05-06_screen-plate1_Pax3555-Sox2488-phall649-reimage.nd2 (series 32)].ome.tif_Pax3Quant.csv	1.175416667	0.077171895
C59-1000-24_NA.csv	NA	NA
CFL-1000-24_2019-05-06_screen-plate1_Pax3555-Sox2488-phall649-reimage.nd2 [2019-05-06_screen-plate1_Pax3555-Sox2488-phall649-reimage.nd2 (series 45)].ome.tif_Pax3Quant.csv	0.4686	0.007105023
CFL-1000-24_2019-05-06_screen-plate1_Pax3555-Sox2488-phall649-reimage.nd2 [2019-05-06_screen-plate1_Pax3555-Sox2488-phall649-reimage.nd2 (series 46)].ome.tif_Pax3Quant.csv	0.473816667	0.034619722
CFL-1000-24_2019-05-06_screen-plate1_Pax3555-Sox2488-phall649-reimage.nd2 [2019-05-06_screen-plate1_Pax3555-Sox2488-phall649-reimage.nd2 (series 47)].ome.tif_Pax3Quant.csv	0.480766667	0.027769247
PD-1000-24_2019-05-06_screen-plate1_Pax3555-Sox2488-phall649-reimage.nd2 [2019-05-06_screen-plate1_Pax3555-Sox2488-phall649-reimage.nd2 (series 27)].ome.tif_Pax3Quant.csv	1.570433333	0.087189326
PD-1000-24_2019-05-06_screen-plate1_Pax3555-Sox2488-phall649-reimage.nd2 [2019-05-06_screen-plate1_Pax3555-Sox2488-phall649-reimage.nd2 (series 28)].ome.tif_Pax3Quant.csv	1.5789	0.048385353
PD-1000-24_NA.csv	NA	NA
PD+C59-1000-24_2019-05-06_screen-plate1_Pax3555-Sox2488-phall649-reimage.nd2 [2019-05-06_screen-plate1_Pax3555-Sox2488-phall649-reimage.nd2 (series 36)].ome.tif_Pax3Quant.csv	1.4572	0.202582965
PD+C59-1000-24_2019-05-06_screen-plate1_Pax3555-Sox2488-phall649-reimage.nd2 [2019-05-06_screen-plate1_Pax3555-Sox2488-phall649-reimage.nd2 (series 37)].ome.tif_Pax3Quant.csv	1.473616667	0.191554399
PD+C59-1000-24_NA.csv	NA	NA
PD+XAV-1000-24_2019-05-06_screen-plate1_Pax3555-Sox2488-phall649-reimage.nd2 [2019-05-06_screen-plate1_Pax3555-Sox2488-phall649-reimage.nd2 (series 33)].ome.tif_Pax3Quant.csv	1.27035	0.058751076
PD+XAV-1000-24_2019-05-06_screen-plate1_Pax3555-Sox2488-phall649-reimage.nd2 [2019-05-06_screen-plate1_Pax3555-Sox2488-phall649-reimage.nd2 (series 34)].ome.tif_Pax3Quant.csv	1.09135	0.104238128
PD+XAV-1000-24_2019-05-06_screen-plate1_Pax3555-Sox2488-phall649-reimage.nd2 [2019-05-06_screen-plate1_Pax3555-Sox2488-phall649-reimage.nd2 (series 35)].ome.tif_Pax3Quant.csv	1.37335	0.089168822
PD+XAV+A83-1000-24_2019-05-06_screen-plate1_Pax3555-Sox2488-phall649-reimage.nd2 [2019-05-06_screen-plate1_Pax3555-Sox2488-phall649-reimage.nd2 (series 40)].ome.tif_Pax3Quant.csv	1.259866667	0.141800106
PD+XAV+A83-1000-24_2019-05-06_screen-plate1_Pax3555-Sox2488-phall649-reimage.nd2 [2019-05-06_screen-plate1_Pax3555-Sox2488-phall649-reimage.nd2 (series 41)].ome.tif_Pax3Quant.csv	1.3495	0.171376531
PD+XAV+A83-1000-24_2019-05-06_screen-plate1_Pax3555-Sox2488-phall649-reimage.nd2 [2019-05-06_screen-plate1_Pax3555-Sox2488-phall649-reimage.nd2 (series 42)].ome.tif_Pax3Quant.csv	1.41065	0.171778713
PD+XAV+A83+LDN-1000-24_2019-05-06_screen-plate1_Pax3555-Sox2488-phall649-reimage.nd2 [2019-05-06_screen-plate1_Pax3555-Sox2488-phall649-reimage.nd2 (series 43)].ome.tif_Pax3Quant.csv	1.1586	0.118776417
PD+XAV+A83+LDN-1000-24_2019-05-06_screen-plate1_Pax3555-Sox2488-phall649-reimage.nd2 [2019-05-06_screen-plate1_Pax3555-Sox2488-phall649-reimage.nd2 (series 44)].ome.tif_Pax3Quant.csv	1.118066667	0.025171188
PD+XAV+A83+LDN-1000-24_NA.csv	NA	NA
PD+XAV+LDN-1000-24_2019-05-06_screen-plate1_Pax3555-Sox2488-phall649-reimage.nd2 [2019-05-06_screen-plate1_Pax3555-Sox2488-phall649-reimage.nd2 (series 38)].ome.tif_Pax3Quant.csv	1.308616667	0.073379
PD+XAV+LDN-1000-24_2019-05-06_screen-plate1_Pax3555-Sox2488-phall649-reimage.nd2 [2019-05-06_screen-plate1_Pax3555-Sox2488-phall649-reimage.nd2 (series 39)].ome.tif_Pax3Quant.csv	1.28585	0.101944788
PD+XAV+LDN-1000-24_NA.csv	NA	NA
XAV-1000-24_2019-05-06_screen-plate1_Pax3555-Sox2488-phall649-reimage.nd2 [2019-05-06_screen-plate1_Pax3555-Sox2488-phall649-reimage.nd2 (series 29)].ome.tif_Pax3Quant.csv	1.303783333	0.133419193
XAV-1000-24_2019-05-06_screen-plate1_Pax3555-Sox2488-phall649-reimage.nd2 [2019-05-06_screen-plate1_Pax3555-Sox2488-phall649-reimage.nd2 (series 30)].ome.tif_Pax3Quant.csv	1.17375	0.080722085
XAV-1000-24_NA.csv	NA	NA
C59-500-48_2019-05-08_screen-plate2_Pax3555-Sox2488-phall64.nd2 [2019-05-08_screen-plate2_Pax3555-Sox2488-phall64.nd2 (series 08)].ome.tif_Pax3Quant.csv	0.9587	0.076522136
C59-500-48_2019-05-08_screen-plate2_Pax3555-Sox2488-phall64.nd2 [2019-05-08_screen-plate2_Pax3555-Sox2488-phall64.nd2 (series 09)].ome.tif_Pax3Quant.csv	0.9097	0.104393048
C59-500-48_2019-05-08_screen-plate2_Pax3555-Sox2488-phall64.nd2 [2019-05-08_screen-plate2_Pax3555-Sox2488-phall64.nd2 (series 10)].ome.tif_Pax3Quant.csv	0.81215	0.067316814
CFL-500-48_2019-05-08_screen-plate2_Pax3555-Sox2488-phall647_part2.nd2 [2019-05-08_screen-plate2_Pax3555-Sox2488-phall647_part2.nd2 (series 01)].ome.tif_Pax3Quant.csv	0.385683333	0.036984876
CFL-500-48_2019-05-08_screen-plate2_Pax3555-Sox2488-phall647_part2.nd2 [2019-05-08_screen-plate2_Pax3555-Sox2488-phall647_part2.nd2 (series 03)].ome.tif_Pax3Quant.csv	0.33825	0.046102915
CFL-500-48_2019-05-08_screen-plate2_Pax3555-Sox2488-phall647_part2.nd2 [2019-05-08_screen-plate2_Pax3555-Sox2488-phall647_part2.nd2 (series 04)].ome.tif_Pax3Quant.csv	0.409933333	0.041780649
PD-500-48_2019-05-08_screen-plate2_Pax3555-Sox2488-phall64.nd2 [2019-05-08_screen-plate2_Pax3555-Sox2488-phall64.nd2 (series 01)].ome.tif_Pax3Quant.csv	0.925083333	0.11694201
PD-500-48_2019-05-08_screen-plate2_Pax3555-Sox2488-phall64.nd2 [2019-05-08_screen-plate2_Pax3555-Sox2488-phall64.nd2 (series 02)].ome.tif_Pax3Quant.csv	0.905466667	0.067634979
PD-500-48_NA.csv	NA	NA
PD+C59-500-48_2019-05-08_screen-plate2_Pax3555-Sox2488-phall64.nd2 [2019-05-08_screen-plate2_Pax3555-Sox2488-phall64.nd2 (series 15)].ome.tif_Pax3Quant.csv	0.9219	0.087935782
PD+C59-500-48_2019-05-08_screen-plate2_Pax3555-Sox2488-phall64.nd2 [2019-05-08_screen-plate2_Pax3555-Sox2488-phall64.nd2 (series 16)].ome.tif_Pax3Quant.csv	0.93825	0.081191054
PD+C59-500-48_2019-05-08_screen-plate2_Pax3555-Sox2488-phall64.nd2 [2019-05-08_screen-plate2_Pax3555-Sox2488-phall64.nd2 (series 17)].ome.tif_Pax3Quant.csv	0.828966667	0.088892235
PD+XAV-500-48_2019-05-08_screen-plate2_Pax3555-Sox2488-phall64.nd2 [2019-05-08_screen-plate2_Pax3555-Sox2488-phall64.nd2 (series 12)].ome.tif_Pax3Quant.csv	0.744016667	0.087427353
PD+XAV-500-48_2019-05-08_screen-plate2_Pax3555-Sox2488-phall64.nd2 [2019-05-08_screen-plate2_Pax3555-Sox2488-phall64.nd2 (series 13)].ome.tif_Pax3Quant.csv	0.776316667	0.089503999
PD+XAV-500-48_2019-05-08_screen-plate2_Pax3555-Sox2488-phall64.nd2 [2019-05-08_screen-plate2_Pax3555-Sox2488-phall64.nd2 (series 14)].ome.tif_Pax3Quant.csv	0.80895	0.140228074
PD+XAV+A83-500-48_2019-05-08_screen-plate2_Pax3555-Sox2488-phall64.nd2 [2019-05-08_screen-plate2_Pax3555-Sox2488-phall64.nd2 (series 23)].ome.tif_Pax3Quant.csv	0.925883333	0.098149159
PD+XAV+A83-500-48_2019-05-08_screen-plate2_Pax3555-Sox2488-phall64.nd2 [2019-05-08_screen-plate2_Pax3555-Sox2488-phall64.nd2 (series 24)].ome.tif_Pax3Quant.csv	0.92695	0.107239701
PD+XAV+A83-500-48_2019-05-08_screen-plate2_Pax3555-Sox2488-phall64.nd2 [2019-05-08_screen-plate2_Pax3555-Sox2488-phall64.nd2 (series 25)].ome.tif_Pax3Quant.csv	1.034333333	0.172709187
PD+XAV+A83+LDN-500-48_2019-05-08_screen-plate2_Pax3555-Sox2488-phall64.nd2 [2019-05-08_screen-plate2_Pax3555-Sox2488-phall64.nd2 (series 28)].ome.tif_Pax3Quant.csv	1.005616667	0.159786202
PD+XAV+A83+LDN-500-48_2019-05-08_screen-plate2_Pax3555-Sox2488-phall64.nd2 [2019-05-08_screen-plate2_Pax3555-Sox2488-phall64.nd2 (series 29)].ome.tif_Pax3Quant.csv	0.901416667	0.15814682
PD+XAV+A83+LDN-500-48_2019-05-08_screen-plate2_Pax3555-Sox2488-phall64.nd2 [2019-05-08_screen-plate2_Pax3555-Sox2488-phall64.nd2 (series 30)].ome.tif_Pax3Quant.csv	0.98755	0.140328721
PD+XAV+LDN-500-48_2019-05-08_screen-plate2_Pax3555-Sox2488-phall64.nd2 [2019-05-08_screen-plate2_Pax3555-Sox2488-phall64.nd2 (series 19)].ome.tif_Pax3Quant.csv	0.9368	0.085078986
PD+XAV+LDN-500-48_2019-05-08_screen-plate2_Pax3555-Sox2488-phall64.nd2 [2019-05-08_screen-plate2_Pax3555-Sox2488-phall64.nd2 (series 21)].ome.tif_Pax3Quant.csv	0.862333333	0.087024576
PD+XAV+LDN-500-48_2019-05-08_screen-plate2_Pax3555-Sox2488-phall64.nd2 [2019-05-08_screen-plate2_Pax3555-Sox2488-phall64.nd2 (series 22)].ome.tif_Pax3Quant.csv	1.061416667	0.238756403
XAV-500-48_2019-05-08_screen-plate2_Pax3555-Sox2488-phall64.nd2 [2019-05-08_screen-plate2_Pax3555-Sox2488-phall64.nd2 (series 03)].ome.tif_Pax3Quant.csv	0.93725	0.097560346
XAV-500-48_2019-05-08_screen-plate2_Pax3555-Sox2488-phall64.nd2 [2019-05-08_screen-plate2_Pax3555-Sox2488-phall64.nd2 (series 05)].ome.tif_Pax3Quant.csv	0.872466667	0.084794161
XAV-500-48_2019-05-08_screen-plate2_Pax3555-Sox2488-phall64.nd2 [2019-05-08_screen-plate2_Pax3555-Sox2488-phall64.nd2 (series 06)].ome.tif_Pax3Quant.csv	1.041516667	0.060353336
C59-1000-48_2019-05-08_screen-plate2_Pax3555-Sox2488-phall647_part2_rei.nd2 [2019-05-08_screen-plate2_Pax3555-Sox2488-phall647_part2_rei.nd2 (series 05)].ome.tif_Pax3Quant.csv	0.705766667	0.030224228
C59-1000-48_2019-05-08_screen-plate2_Pax3555-Sox2488-phall647_part2_rei.nd2 [2019-05-08_screen-plate2_Pax3555-Sox2488-phall647_part2_rei.nd2 (series 06)].ome.tif_Pax3Quant.csv	0.664566667	0.049715927
C59-1000-48_NA.csv	NA	NA
CFL-1000-48_2019-05-08_screen-plate2_Pax3555-Sox2488-phall647_part2_rei.nd2 [2019-05-08_screen-plate2_Pax3555-Sox2488-phall647_part2_rei.nd2 (series 20)].ome.tif_Pax3Quant.csv	0.345966667	0.012145958
CFL-1000-48_2019-05-08_screen-plate2_Pax3555-Sox2488-phall647_part2_rei.nd2 [2019-05-08_screen-plate2_Pax3555-Sox2488-phall647_part2_rei.nd2 (series 21)].ome.tif_Pax3Quant.csv	0.408166667	0.026544601
CFL-1000-48_2019-05-08_screen-plate2_Pax3555-Sox2488-phall647_part2_rei.nd2 [2019-05-08_screen-plate2_Pax3555-Sox2488-phall647_part2_rei.nd2 (series 22)].ome.tif_Pax3Quant.csv	0.342816667	0.0287051
PD-1000-48_2019-05-08_screen-plate2_Pax3555-Sox2488-phall647_part2_rei.nd2 [2019-05-08_screen-plate2_Pax3555-Sox2488-phall647_part2_rei.nd2 (series 01)].ome.tif_Pax3Quant.csv	0.7373	0.072543453
PD-1000-48_2019-05-08_screen-plate2_Pax3555-Sox2488-phall647_part2_rei.nd2 [2019-05-08_screen-plate2_Pax3555-Sox2488-phall647_part2_rei.nd2 (series 02)].ome.tif_Pax3Quant.csv	0.642983333	0.06471934
PD-1000-48_NA.csv	NA	NA
PD+C59-1000-48_2019-05-08_screen-plate2_Pax3555-Sox2488-phall647_part2_rei.nd2 [2019-05-08_screen-plate2_Pax3555-Sox2488-phall647_part2_rei.nd2 (series 09)].ome.tif_Pax3Quant.csv	0.702566667	0.053052697
PD+C59-1000-48_2019-05-08_screen-plate2_Pax3555-Sox2488-phall647_part2_rei.nd2 [2019-05-08_screen-plate2_Pax3555-Sox2488-phall647_part2_rei.nd2 (series 10)].ome.tif_Pax3Quant.csv	0.69385	0.028867802
PD+C59-1000-48_NA.csv	NA	NA
PD+XAV-1000-48_2019-05-08_screen-plate2_Pax3555-Sox2488-phall647_part2_rei.nd2 [2019-05-08_screen-plate2_Pax3555-Sox2488-phall647_part2_rei.nd2 (series 07)].ome.tif_Pax3Quant.csv	0.707033333	0.067591737
PD+XAV-1000-48_2019-05-08_screen-plate2_Pax3555-Sox2488-phall647_part2_rei.nd2 [2019-05-08_screen-plate2_Pax3555-Sox2488-phall647_part2_rei.nd2 (series 08)].ome.tif_Pax3Quant.csv	0.729466667	0.062386838
PD+XAV-1000-48_NA.csv	NA	NA
PD+XAV+A83-1000-48_2019-05-08_screen-plate2_Pax3555-Sox2488-phall647_part2_rei.nd2 [2019-05-08_screen-plate2_Pax3555-Sox2488-phall647_part2_rei.nd2 (series 14)].ome.tif_Pax3Quant.csv	0.686633333	0.029852727
PD+XAV+A83-1000-48_2019-05-08_screen-plate2_Pax3555-Sox2488-phall647_part2_rei.nd2 [2019-05-08_screen-plate2_Pax3555-Sox2488-phall647_part2_rei.nd2 (series 15)].ome.tif_Pax3Quant.csv	0.755833333	0.042305654
PD+XAV+A83-1000-48_2019-05-08_screen-plate2_Pax3555-Sox2488-phall647_part2_rei.nd2 [2019-05-08_screen-plate2_Pax3555-Sox2488-phall647_part2_rei.nd2 (series 16)].ome.tif_Pax3Quant.csv	0.664683333	0.033502589
PD+XAV+A83+LDN-1000-48_2019-05-08_screen-plate2_Pax3555-Sox2488-phall647_part2_rei.nd2 [2019-05-08_screen-plate2_Pax3555-Sox2488-phall647_part2_rei.nd2 (series 17)].ome.tif_Pax3Quant.csv	0.6544	0.056344942
PD+XAV+A83+LDN-1000-48_2019-05-08_screen-plate2_Pax3555-Sox2488-phall647_part2_rei.nd2 [2019-05-08_screen-plate2_Pax3555-Sox2488-phall647_part2_rei.nd2 (series 18)].ome.tif_Pax3Quant.csv	0.621066667	0.055641061
PD+XAV+A83+LDN-1000-48_2019-05-08_screen-plate2_Pax3555-Sox2488-phall647_part2_rei.nd2 [2019-05-08_screen-plate2_Pax3555-Sox2488-phall647_part2_rei.nd2 (series 19)].ome.tif_Pax3Quant.csv	0.627233333	0.026202191
PD+XAV+LDN-1000-48_2019-05-08_screen-plate2_Pax3555-Sox2488-phall647_part2_rei.nd2 [2019-05-08_screen-plate2_Pax3555-Sox2488-phall647_part2_rei.nd2 (series 11)].ome.tif_Pax3Quant.csv	0.6288	0.04787158
PD+XAV+LDN-1000-48_2019-05-08_screen-plate2_Pax3555-Sox2488-phall647_part2_rei.nd2 [2019-05-08_screen-plate2_Pax3555-Sox2488-phall647_part2_rei.nd2 (series 12)].ome.tif_Pax3Quant.csv	0.7113	0.037142556
PD+XAV+LDN-1000-48_2019-05-08_screen-plate2_Pax3555-Sox2488-phall647_part2_rei.nd2 [2019-05-08_screen-plate2_Pax3555-Sox2488-phall647_part2_rei.nd2 (series 13)].ome.tif_Pax3Quant.csv	0.671183333	0.038843228
XAV-1000-48_2019-05-08_screen-plate2_Pax3555-Sox2488-phall647_part2_rei.nd2 [2019-05-08_screen-plate2_Pax3555-Sox2488-phall647_part2_rei.nd2 (series 03)].ome.tif_Pax3Quant.csv	0.717	0.064952916
XAV-1000-48_2019-05-08_screen-plate2_Pax3555-Sox2488-phall647_part2_rei.nd2 [2019-05-08_screen-plate2_Pax3555-Sox2488-phall647_part2_rei.nd2 (series 04)].ome.tif_Pax3Quant.csv	0.75545	0.017176477
XAV-1000-48_NA.csv	NA	NA
