# Supplementary material for: Paraxial mesoderm organoids model development of human somites
Source: eLife. 2022 Jan 28;11:e68925. doi: 10.7554/eLife.68925 (PMC8906808; doi:10.7554/eLife.68925)
Supplement: Figure 3—figure supplement 2—source data 1. [file elife-68925-fig3-figsupp2-data1.csv]

	FOXC1	FOXC2	MEOX1	MEOX2	PARAXIS	PAX3	PP1A	TBX18	UNCX
CFL, 24	4349.598941	7065.944326	107.3863392	32.74796454	52.10440113	15216.33542	1	1028.742835	106.1529019
CFL, 48	2235.941406	5752.606211	32.97574465	0.810377861	11.20962932	312.9959111	1	24.87572497	0.388683203
PD-100 + C59-1, 24	3902.00524	5256.912476	80.63494719	64	30.20397801	12133.15115	1	709.1760477	88.23831482
PD-100 + C59-1, 48	6094.673977	9047.687174	93.26949063	107.6347412	45.78066984	14732.01006	1	178.5271893	206.0237241
PD-250 + XAV-1 + A83, 24	4826.182201	5819.448275	89.88447205	97.45515982	34.69525985	13094.43932	1	383.5666117	100.6590679
PD-250 + XAV-1 + A83, 48	5765.91292	8229.942677	147.7144002	192.6715837	40.88028455	17970.38047	1	77.88822487	199.0057998
PD-250 + XAV-1 + A83 + LDN, 24	4544.796558	6746.857613	90.7190315	91.98542199	38.23088432	17318.18358	1	338.5753974	136.5545271
PD-250 + XAV-1 + A83 + LDN, 48	4961.864651	6888.623434	137.1870032	109.3897183	44.22121216	15357.61607	1	82.71058116	172.4458978
XAV-2, 24	3089.876228	4329.545894	69.87316893	117.5121946	27.72918547	11164.77585	1	710.8164866	86.62230554
XAV-2, 48	3786.545808	5442.297095	76.6386371	85.62736351	33.59093388	11638.89655	1	627.4398426	132.5139103
Control	1	1	1	1	1	1	1	1	1
