# Supplementary material for: Paraxial mesoderm organoids model development of human somites
Source: eLife. 2022 Jan 28;11:e68925. doi: 10.7554/eLife.68925 (PMC8906808; doi:10.7554/eLife.68925)
Supplement: Figure 3—source data 1. [file elife-68925-fig3-data1.csv]

File	Means	SD
C59-1_24_2019-08-20_2ndary_D4_0-24h_plate2_run1.nd2 [2019-08-20_2ndary_D4_0-24h_plate2_run1.nd2 (series 12)].ome.tif_Pax3Quant.csv	0.91121	0.031797749
C59-1_24_2019-08-20_2ndary_D4_0-24h_plate2_run1.nd2 [2019-08-20_2ndary_D4_0-24h_plate2_run1.nd2 (series 13)].ome.tif_Pax3Quant.csv	0.99971	0.053973674
C59-1_24_2019-08-20_2ndary_D4_0-24h_plate2_run1.nd2 [2019-08-20_2ndary_D4_0-24h_plate2_run1.nd2 (series 14)].ome.tif_Pax3Quant.csv	0.99684	0.054173071
C59-1_24_2019-08-20_2ndary_D4_0-24h_plate2_run1.nd2 [2019-08-20_2ndary_D4_0-24h_plate2_run1.nd2 (series 15)].ome.tif_Pax3Quant.csv	1.00183	0.057122066
C59-1_24_2019-08-20_2ndary_D4_0-24h_plate2_run1.nd2 [2019-08-20_2ndary_D4_0-24h_plate2_run1.nd2 (series 16)].ome.tif_Pax3Quant.csv	1.03421	0.069055576
C59-2_24_2019-08-21_2ndary_D4_0-24h_plate2_run2.nd2 [2019-08-21_2ndary_D4_0-24h_plate2_run2.nd2 (series 01)].ome.tif_Pax3Quant.csv	NA
C59-2_24_2019-08-21_2ndary_D4_0-24h_plate2_run2.nd2 [2019-08-21_2ndary_D4_0-24h_plate2_run2.nd2 (series 01)].ome.tif_Pax3Quant.csv	NA
C59-2_24_2019-08-21_2ndary_D4_0-24h_plate2_run2.nd2 [2019-08-21_2ndary_D4_0-24h_plate2_run2.nd2 (series 01)].ome.tif_Pax3Quant.csv	0.98103	0.079626458
C59-2_24_2019-08-21_2ndary_D4_0-24h_plate2_run2.nd2 [2019-08-21_2ndary_D4_0-24h_plate2_run2.nd2 (series 02)].ome.tif_Pax3Quant.csv	0.95546	0.056603605
C59-2_24_2019-08-21_2ndary_D4_0-24h_plate2_run2.nd2 [2019-08-21_2ndary_D4_0-24h_plate2_run2.nd2 (series 03)].ome.tif_Pax3Quant.csv	0.94181	0.052110158
CFL_24_2019-08-20_2ndary_D4_0-24h_plate2_run1.nd2 [2019-08-20_2ndary_D4_0-24h_plate2_run1.nd2 (series 17)].ome.tif_Pax3Quant.csv	0.83395	0.019116007
CFL_24_2019-08-20_2ndary_D4_0-24h_plate2_run1.nd2 [2019-08-20_2ndary_D4_0-24h_plate2_run1.nd2 (series 18)].ome.tif_Pax3Quant.csv	0.84262	0.010652244
CFL_24_2019-08-20_2ndary_D4_0-24h_plate2_run1.nd2 [2019-08-20_2ndary_D4_0-24h_plate2_run1.nd2 (series 19)].ome.tif_Pax3Quant.csv	0.85357	0.019257036
CFL_24_2019-08-20_2ndary_D4_0-24h_plate2_run1.nd2 [2019-08-20_2ndary_D4_0-24h_plate2_run1.nd2 (series 20)].ome.tif_Pax3Quant.csv	0.84396	0.01845985
CFL_24_2019-08-20_2ndary_D4_0-24h_plate2_run1.nd2 [2019-08-20_2ndary_D4_0-24h_plate2_run1.nd2 (series 21)].ome.tif_Pax3Quant.csv	0.8377	0.01400541
CFL_24_2019-08-20_2ndary_D4_0-24h_plate2_run1.nd2 [2019-08-20_2ndary_D4_0-24h_plate2_run1.nd2 (series 32)].ome.tif_Pax3Quant.csv	0.83012	0.027808973
CFL_24_2019-08-20_2ndary_D4_0-24h_plate2_run1.nd2 [2019-08-20_2ndary_D4_0-24h_plate2_run1.nd2 (series 33)].ome.tif_Pax3Quant.csv	0.82166	0.027350409
CFL_24_2019-08-20_2ndary_D4_0-24h_plate2_run1.nd2 [2019-08-20_2ndary_D4_0-24h_plate2_run1.nd2 (series 34)].ome.tif_Pax3Quant.csv	0.97711	0.061190033
CFL_24_2019-08-20_2ndary_D4_0-24h_plate2_run1.nd2 [2019-08-20_2ndary_D4_0-24h_plate2_run1.nd2 (series 35)].ome.tif_Pax3Quant.csv	0.82072	0.027536231
CFL_24_2019-08-20_2ndary_D4_0-24h_plate2_run1.nd2 [2019-08-20_2ndary_D4_0-24h_plate2_run1.nd2 (series 36)].ome.tif_Pax3Quant.csv	0.82101	0.021768059
PD-100_24_2019-08-20_2ndary_D4_0-24h_plate2_run1.nd2 [2019-08-20_2ndary_D4_0-24h_plate2_run1.nd2 (series 01)].ome.tif_Pax3Quant.csv	0.80063	0.030455351
PD-100_24_2019-08-20_2ndary_D4_0-24h_plate2_run1.nd2 [2019-08-20_2ndary_D4_0-24h_plate2_run1.nd2 (series 02)].ome.tif_Pax3Quant.csv	0.84701	0.021046603
PD-100_24_2019-08-20_2ndary_D4_0-24h_plate2_run1.nd2 [2019-08-20_2ndary_D4_0-24h_plate2_run1.nd2 (series 03)].ome.tif_Pax3Quant.csv	0.8707	0.009391055
PD-100_24_2019-08-20_2ndary_D4_0-24h_plate2_run1.nd2 [2019-08-20_2ndary_D4_0-24h_plate2_run1.nd2 (series 04)].ome.tif_Pax3Quant.csv	0.94922	0.02867427
PD-100_24_2019-08-20_2ndary_D4_0-24h_plate2_run1.nd2 [2019-08-20_2ndary_D4_0-24h_plate2_run1.nd2 (series 05)].ome.tif_Pax3Quant.csv	0.95273	0.029882888
PD-100_C59-1_24_2019-08-20_2ndary_D4_0-24h_plate2_run1.nd2 [2019-08-20_2ndary_D4_0-24h_plate2_run1.nd2 (series 22)].ome.tif_Pax3Quant.csv	0.95445	0.038833854
PD-100_C59-1_24_2019-08-20_2ndary_D4_0-24h_plate2_run1.nd2 [2019-08-20_2ndary_D4_0-24h_plate2_run1.nd2 (series 23)].ome.tif_Pax3Quant.csv	0.94223	0.036184392
PD-100_C59-1_24_2019-08-20_2ndary_D4_0-24h_plate2_run1.nd2 [2019-08-20_2ndary_D4_0-24h_plate2_run1.nd2 (series 24)].ome.tif_Pax3Quant.csv	0.98272	0.042255854
PD-100_C59-1_24_2019-08-20_2ndary_D4_0-24h_plate2_run1.nd2 [2019-08-20_2ndary_D4_0-24h_plate2_run1.nd2 (series 25)].ome.tif_Pax3Quant.csv	0.94335	0.039690055
PD-100_C59-1_24_2019-08-20_2ndary_D4_0-24h_plate2_run1.nd2 [2019-08-20_2ndary_D4_0-24h_plate2_run1.nd2 (series 26)].ome.tif_Pax3Quant.csv	0.93641	0.048181914
PD-100_C59-2_24_2019-08-20_2ndary_D4_0-24h_plate2_run1.nd2 [2019-08-20_2ndary_D4_0-24h_plate2_run1.nd2 (series 27)].ome.tif_Pax3Quant.csv	0.941	0.039469461
PD-100_C59-2_24_2019-08-20_2ndary_D4_0-24h_plate2_run1.nd2 [2019-08-20_2ndary_D4_0-24h_plate2_run1.nd2 (series 28)].ome.tif_Pax3Quant.csv	0.89361	0.040294596
PD-100_C59-2_24_2019-08-20_2ndary_D4_0-24h_plate2_run1.nd2 [2019-08-20_2ndary_D4_0-24h_plate2_run1.nd2 (series 29)].ome.tif_Pax3Quant.csv	0.89723	0.037372505
PD-100_C59-2_24_2019-08-20_2ndary_D4_0-24h_plate2_run1.nd2 [2019-08-20_2ndary_D4_0-24h_plate2_run1.nd2 (series 30)].ome.tif_Pax3Quant.csv	0.85216	0.037984505
PD-100_C59-2_24_2019-08-20_2ndary_D4_0-24h_plate2_run1.nd2 [2019-08-20_2ndary_D4_0-24h_plate2_run1.nd2 (series 31)].ome.tif_Pax3Quant.csv	0.83516	0.027559933
PD-100_XAV-1_A83_24_2019-08-21_2ndary_D4_0-24h_plate2_run2.nd2 [2019-08-21_2ndary_D4_0-24h_plate2_run2.nd2 (series 13)].ome.tif_Pax3Quant.csv	0.84895	0.046407805
PD-100_XAV-1_A83_24_2019-08-21_2ndary_D4_0-24h_plate2_run2.nd2 [2019-08-21_2ndary_D4_0-24h_plate2_run2.nd2 (series 14)].ome.tif_Pax3Quant.csv	0.8836	0.047783815
PD-100_XAV-1_A83_24_2019-08-21_2ndary_D4_0-24h_plate2_run2.nd2 [2019-08-21_2ndary_D4_0-24h_plate2_run2.nd2 (series 15)].ome.tif_Pax3Quant.csv	0.87034	0.058674968
PD-100_XAV-1_A83_LDN_24_2019-08-21_2ndary_D4_0-24h_plate2_run2.nd2 [2019-08-21_2ndary_D4_0-24h_plate2_run2.nd2 (series 19)].ome.tif_Pax3Quant.csv	0.85319	0.038591278
PD-100_XAV-1_A83_LDN_24_2019-08-21_2ndary_D4_0-24h_plate2_run2.nd2 [2019-08-21_2ndary_D4_0-24h_plate2_run2.nd2 (series 20)].ome.tif_Pax3Quant.csv	0.89905	0.051816182
PD-100_XAV-2_A83_24_2019-08-21_2ndary_D4_0-24h_plate2_run2.nd2 [2019-08-21_2ndary_D4_0-24h_plate2_run2.nd2 (series 34)].ome.tif_Pax3Quant.csv	0.82862	0.036613399
PD-100_XAV-2_A83_24_2019-08-21_2ndary_D4_0-24h_plate2_run2.nd2 [2019-08-21_2ndary_D4_0-24h_plate2_run2.nd2 (series 35)].ome.tif_Pax3Quant.csv	0.80542	0.036788278
PD-100_XAV-2_A83_24_2019-08-21_2ndary_D4_0-24h_plate2_run2.nd2 [2019-08-21_2ndary_D4_0-24h_plate2_run2.nd2 (series 36)].ome.tif_Pax3Quant.csv	0.83723	0.029513515
PD-100_XAV-2_A83_LDN_24_2019-08-21_2ndary_D4_0-24h_plate2_run2.nd2 [2019-08-21_2ndary_D4_0-24h_plate2_run2.nd2 (series 28)].ome.tif_Pax3Quant.csv	0.808	0.028067379
PD-100_XAV-2_A83_LDN_24_2019-08-21_2ndary_D4_0-24h_plate2_run2.nd2 [2019-08-21_2ndary_D4_0-24h_plate2_run2.nd2 (series 29)].ome.tif_Pax3Quant.csv	0.79169	0.026235412
PD-250_24_2019-08-21_2ndary_D4_0-24h_plate2_run2.nd2 [2019-08-21_2ndary_D4_0-24h_plate2_run2.nd2 (series 07)].ome.tif_Pax3Quant.csv	NA
PD-250_24_2019-08-21_2ndary_D4_0-24h_plate2_run2.nd2 [2019-08-21_2ndary_D4_0-24h_plate2_run2.nd2 (series 07)].ome.tif_Pax3Quant.csv	NA
PD-250_24_2019-08-21_2ndary_D4_0-24h_plate2_run2.nd2 [2019-08-21_2ndary_D4_0-24h_plate2_run2.nd2 (series 07)].ome.tif_Pax3Quant.csv	0.84614	0.027929572
PD-250_24_2019-08-21_2ndary_D4_0-24h_plate2_run2.nd2 [2019-08-21_2ndary_D4_0-24h_plate2_run2.nd2 (series 08)].ome.tif_Pax3Quant.csv	0.89725	0.044081049
PD-250_24_2019-08-21_2ndary_D4_0-24h_plate2_run2.nd2 [2019-08-21_2ndary_D4_0-24h_plate2_run2.nd2 (series 09)].ome.tif_Pax3Quant.csv	0.94707	0.042351882
PD-250_C59-1_24_2019-08-21_2ndary_D4_0-24h_plate2_run2.nd2 [2019-08-21_2ndary_D4_0-24h_plate2_run2.nd2 (series 10)].ome.tif_Pax3Quant.csv	NA
PD-250_C59-1_24_2019-08-21_2ndary_D4_0-24h_plate2_run2.nd2 [2019-08-21_2ndary_D4_0-24h_plate2_run2.nd2 (series 10)].ome.tif_Pax3Quant.csv	NA
PD-250_C59-1_24_2019-08-21_2ndary_D4_0-24h_plate2_run2.nd2 [2019-08-21_2ndary_D4_0-24h_plate2_run2.nd2 (series 10)].ome.tif_Pax3Quant.csv	0.95386	0.052432741
PD-250_C59-1_24_2019-08-21_2ndary_D4_0-24h_plate2_run2.nd2 [2019-08-21_2ndary_D4_0-24h_plate2_run2.nd2 (series 11)].ome.tif_Pax3Quant.csv	0.94682	0.082183999
PD-250_C59-1_24_2019-08-21_2ndary_D4_0-24h_plate2_run2.nd2 [2019-08-21_2ndary_D4_0-24h_plate2_run2.nd2 (series 12)].ome.tif_Pax3Quant.csv	0.87173	0.036241294
PD-250_C59-2_24_2019-08-21_2ndary_D4_0-24h_plate2_run2.nd2 [2019-08-21_2ndary_D4_0-24h_plate2_run2.nd2 (series 37)].ome.tif_Pax3Quant.csv	NA
PD-250_C59-2_24_2019-08-21_2ndary_D4_0-24h_plate2_run2.nd2 [2019-08-21_2ndary_D4_0-24h_plate2_run2.nd2 (series 37)].ome.tif_Pax3Quant.csv	NA
PD-250_C59-2_24_2019-08-21_2ndary_D4_0-24h_plate2_run2.nd2 [2019-08-21_2ndary_D4_0-24h_plate2_run2.nd2 (series 37)].ome.tif_Pax3Quant.csv	0.81116	0.030547106
PD-250_C59-2_24_2019-08-21_2ndary_D4_0-24h_plate2_run2.nd2 [2019-08-21_2ndary_D4_0-24h_plate2_run2.nd2 (series 38)].ome.tif_Pax3Quant.csv	0.77321	0.024559265
PD-250_C59-2_24_2019-08-21_2ndary_D4_0-24h_plate2_run2.nd2 [2019-08-21_2ndary_D4_0-24h_plate2_run2.nd2 (series 39)].ome.tif_Pax3Quant.csv	0.83128	0.032530042
PD-250_XAV-1_A83_24_2019-08-21_2ndary_D4_0-24h_plate2_run2.nd2 [2019-08-21_2ndary_D4_0-24h_plate2_run2.nd2 (series 16)].ome.tif_Pax3Quant.csv	0.87324	0.041188927
PD-250_XAV-1_A83_24_2019-08-21_2ndary_D4_0-24h_plate2_run2.nd2 [2019-08-21_2ndary_D4_0-24h_plate2_run2.nd2 (series 17)].ome.tif_Pax3Quant.csv	0.89602	0.053429833
PD-250_XAV-1_A83_24_2019-08-21_2ndary_D4_0-24h_plate2_run2.nd2 [2019-08-21_2ndary_D4_0-24h_plate2_run2.nd2 (series 18)].ome.tif_Pax3Quant.csv	0.84968	0.036188586
PD-250_XAV-1_A83_LDN_24_2019-08-21_2ndary_D4_0-24h_plate2_run2.nd2 [2019-08-21_2ndary_D4_0-24h_plate2_run2.nd2 (series 22)].ome.tif_Pax3Quant.csv	0.82337	0.035342096
PD-250_XAV-1_A83_LDN_24_2019-08-21_2ndary_D4_0-24h_plate2_run2.nd2 [2019-08-21_2ndary_D4_0-24h_plate2_run2.nd2 (series 23)].ome.tif_Pax3Quant.csv	0.81598	0.034901009
PD-250_XAV-2_A83_24_2019-08-21_2ndary_D4_0-24h_plate2_run2.nd2 [2019-08-21_2ndary_D4_0-24h_plate2_run2.nd2 (series 31)].ome.tif_Pax3Quant.csv	0.81372	0.027370662
PD-250_XAV-2_A83_24_2019-08-21_2ndary_D4_0-24h_plate2_run2.nd2 [2019-08-21_2ndary_D4_0-24h_plate2_run2.nd2 (series 32)].ome.tif_Pax3Quant.csv	0.83193	0.032247545
PD-250_XAV-2_A83_24_2019-08-21_2ndary_D4_0-24h_plate2_run2.nd2 [2019-08-21_2ndary_D4_0-24h_plate2_run2.nd2 (series 33)].ome.tif_Pax3Quant.csv	0.79143	0.024483866
PD-250_XAV-2_A83_LDN_24_2019-08-21_2ndary_D4_0-24h_plate2_run2.nd2 [2019-08-21_2ndary_D4_0-24h_plate2_run2.nd2 (series 25)].ome.tif_Pax3Quant.csv	0.7754	0.026603714
PD-250_XAV-2_A83_LDN_24_2019-08-21_2ndary_D4_0-24h_plate2_run2.nd2 [2019-08-21_2ndary_D4_0-24h_plate2_run2.nd2 (series 26)].ome.tif_Pax3Quant.csv	0.74371	0.01493778
XAV-1_24_2019-08-20_2ndary_D4_0-24h_plate2_run1.nd2 [2019-08-20_2ndary_D4_0-24h_plate2_run1.nd2 (series 06)].ome.tif_Pax3Quant.csv	0.9827	0.044391168
XAV-1_24_2019-08-20_2ndary_D4_0-24h_plate2_run1.nd2 [2019-08-20_2ndary_D4_0-24h_plate2_run1.nd2 (series 07)].ome.tif_Pax3Quant.csv	0.96064	0.026475268
XAV-1_24_2019-08-20_2ndary_D4_0-24h_plate2_run1.nd2 [2019-08-20_2ndary_D4_0-24h_plate2_run1.nd2 (series 08)].ome.tif_Pax3Quant.csv	0.99549	0.051739537
XAV-1_24_2019-08-20_2ndary_D4_0-24h_plate2_run1.nd2 [2019-08-20_2ndary_D4_0-24h_plate2_run1.nd2 (series 09)].ome.tif_Pax3Quant.csv	0.98274	0.040768779
XAV-1_24_2019-08-20_2ndary_D4_0-24h_plate2_run1.nd2 [2019-08-20_2ndary_D4_0-24h_plate2_run1.nd2 (series 10)].ome.tif_Pax3Quant.csv	0.98555	0.04244649
XAV-2_24_2019-08-21_2ndary_D4_0-24h_plate2_run2.nd2 [2019-08-21_2ndary_D4_0-24h_plate2_run2.nd2 (series 04)].ome.tif_Pax3Quant.csv	NA
XAV-2_24_2019-08-21_2ndary_D4_0-24h_plate2_run2.nd2 [2019-08-21_2ndary_D4_0-24h_plate2_run2.nd2 (series 04)].ome.tif_Pax3Quant.csv	NA
XAV-2_24_2019-08-21_2ndary_D4_0-24h_plate2_run2.nd2 [2019-08-21_2ndary_D4_0-24h_plate2_run2.nd2 (series 04)].ome.tif_Pax3Quant.csv	0.9059	0.046181132
XAV-2_24_2019-08-21_2ndary_D4_0-24h_plate2_run2.nd2 [2019-08-21_2ndary_D4_0-24h_plate2_run2.nd2 (series 05)].ome.tif_Pax3Quant.csv	0.95183	0.047053603
XAV-2_24_2019-08-21_2ndary_D4_0-24h_plate2_run2.nd2 [2019-08-21_2ndary_D4_0-24h_plate2_run2.nd2 (series 06)].ome.tif_Pax3Quant.csv	0.95209	0.060183909
C59-1_48_2019-08-22_2ndary_D5_0-48h_plate3_run1.nd2 [2019-08-22_2ndary_D5_0-48h_plate3_run1.nd2 (series 07)].ome.tif_Pax3Quant.csv	0.86937	0.054598748
C59-1_48_2019-08-22_2ndary_D5_0-48h_plate3_run1.nd2 [2019-08-22_2ndary_D5_0-48h_plate3_run1.nd2 (series 08)].ome.tif_Pax3Quant.csv	0.8883	0.073737249
C59-1_48_2019-08-22_2ndary_D5_0-48h_plate3_run1.nd2 [2019-08-22_2ndary_D5_0-48h_plate3_run1.nd2 (series 09)].ome.tif_Pax3Quant.csv	0.91557	0.09956159
C59-1_48_2019-08-22_2ndary_D5_0-48h_plate3_run1.nd2 [2019-08-22_2ndary_D5_0-48h_plate3_run1.nd2 (series 09)].ome.tif_Pax3Quant.csv	NA
C59-1_48_2019-08-22_2ndary_D5_0-48h_plate3_run1.nd2 [2019-08-22_2ndary_D5_0-48h_plate3_run1.nd2 (series 09)].ome.tif_Pax3Quant.csv	NA
C59-2_48_2019-08-22_2ndary_D5_0-48h_plate3_run1.nd2 [2019-08-22_2ndary_D5_0-48h_plate3_run1.nd2 (series 22)].ome.tif_Pax3Quant.csv	1.05561	0.118218245
C59-2_48_2019-08-22_2ndary_D5_0-48h_plate3_run1.nd2 [2019-08-22_2ndary_D5_0-48h_plate3_run1.nd2 (series 23)].ome.tif_Pax3Quant.csv	1.0518	0.110534057
C59-2_48_2019-08-22_2ndary_D5_0-48h_plate3_run1.nd2 [2019-08-22_2ndary_D5_0-48h_plate3_run1.nd2 (series 24)].ome.tif_Pax3Quant.csv	1.06065	0.088114294
C59-2_48_2019-08-22_2ndary_D5_0-48h_plate3_run1.nd2 [2019-08-22_2ndary_D5_0-48h_plate3_run1.nd2 (series 24)].ome.tif_Pax3Quant.csv	NA
C59-2_48_2019-08-22_2ndary_D5_0-48h_plate3_run1.nd2 [2019-08-22_2ndary_D5_0-48h_plate3_run1.nd2 (series 24)].ome.tif_Pax3Quant.csv	NA
CFL_48_2019-08-22_2ndary_D5_0-48h_plate3_run1.nd2 [2019-08-22_2ndary_D5_0-48h_plate3_run1.nd2 (series 01)].ome.tif_Pax3Quant.csv	0.72354	0.011253211
CFL_48_2019-08-22_2ndary_D5_0-48h_plate3_run1.nd2 [2019-08-22_2ndary_D5_0-48h_plate3_run1.nd2 (series 02)].ome.tif_Pax3Quant.csv	0.74354	0.006565013
CFL_48_2019-08-22_2ndary_D5_0-48h_plate3_run1.nd2 [2019-08-22_2ndary_D5_0-48h_plate3_run1.nd2 (series 03)].ome.tif_Pax3Quant.csv	0.78039	0.013965972
CFL_48_2019-08-22_2ndary_D5_0-48h_plate3_run1.nd2 [2019-08-22_2ndary_D5_0-48h_plate3_run1.nd2 (series 28)].ome.tif_Pax3Quant.csv	0.89626	0.064050898
CFL_48_2019-08-22_2ndary_D5_0-48h_plate3_run1.nd2 [2019-08-22_2ndary_D5_0-48h_plate3_run1.nd2 (series 29)].ome.tif_Pax3Quant.csv	0.91815	0.069714624
CFL_48_2019-08-23_2ndary_D5_0-48h_plate3_run2.nd2 [2019-08-23_2ndary_D5_0-48h_plate3_run2.nd2 (series 01)].ome.tif_Pax3Quant.csv	0.83107	0.041258548
CFL_48_2019-08-23_2ndary_D5_0-48h_plate3_run2.nd2 [2019-08-23_2ndary_D5_0-48h_plate3_run2.nd2 (series 01)].ome.tif_Pax3Quant.csv	NA
CFL_48_2019-08-23_2ndary_D5_0-48h_plate3_run2.nd2 [2019-08-23_2ndary_D5_0-48h_plate3_run2.nd2 (series 01)].ome.tif_Pax3Quant.csv	NA
CFL_48_2019-08-23_2ndary_D5_0-48h_plate3_run2.nd2 [2019-08-23_2ndary_D5_0-48h_plate3_run2.nd2 (series 01)].ome.tif_Pax3Quant.csv	NA
CFL_48_2019-08-23_2ndary_D5_0-48h_plate3_run2.nd2 [2019-08-23_2ndary_D5_0-48h_plate3_run2.nd2 (series 01)].ome.tif_Pax3Quant.csv	NA
PD-100_48_2019-08-22_2ndary_D5_0-48h_plate3_run1.nd2 [2019-08-22_2ndary_D5_0-48h_plate3_run1.nd2 (series 04)].ome.tif_Pax3Quant.csv	0.79595	0.031353757
PD-100_48_2019-08-22_2ndary_D5_0-48h_plate3_run1.nd2 [2019-08-22_2ndary_D5_0-48h_plate3_run1.nd2 (series 05)].ome.tif_Pax3Quant.csv	0.82436	0.032233843
PD-100_48_2019-08-22_2ndary_D5_0-48h_plate3_run1.nd2 [2019-08-22_2ndary_D5_0-48h_plate3_run1.nd2 (series 06)].ome.tif_Pax3Quant.csv	0.8129	0.034990764
PD-100_48_2019-08-22_2ndary_D5_0-48h_plate3_run1.nd2 [2019-08-22_2ndary_D5_0-48h_plate3_run1.nd2 (series 06)].ome.tif_Pax3Quant.csv	NA
PD-100_48_2019-08-22_2ndary_D5_0-48h_plate3_run1.nd2 [2019-08-22_2ndary_D5_0-48h_plate3_run1.nd2 (series 06)].ome.tif_Pax3Quant.csv	NA
PD-100_C59-1_48_2019-08-22_2ndary_D5_0-48h_plate3_run1.nd2 [2019-08-22_2ndary_D5_0-48h_plate3_run1.nd2 (series 13)].ome.tif_Pax3Quant.csv	0.80948	0.029639749
PD-100_C59-1_48_2019-08-22_2ndary_D5_0-48h_plate3_run1.nd2 [2019-08-22_2ndary_D5_0-48h_plate3_run1.nd2 (series 14)].ome.tif_Pax3Quant.csv	0.83435	0.039227226
PD-100_C59-1_48_2019-08-22_2ndary_D5_0-48h_plate3_run1.nd2 [2019-08-22_2ndary_D5_0-48h_plate3_run1.nd2 (series 15)].ome.tif_Pax3Quant.csv	0.86358	0.047213288
PD-100_C59-1_48_2019-08-22_2ndary_D5_0-48h_plate3_run1.nd2 [2019-08-22_2ndary_D5_0-48h_plate3_run1.nd2 (series 15)].ome.tif_Pax3Quant.csv	NA
PD-100_C59-1_48_2019-08-22_2ndary_D5_0-48h_plate3_run1.nd2 [2019-08-22_2ndary_D5_0-48h_plate3_run1.nd2 (series 15)].ome.tif_Pax3Quant.csv	NA
PD-100_C59-2_48_2019-08-22_2ndary_D5_0-48h_plate3_run1.nd2 [2019-08-22_2ndary_D5_0-48h_plate3_run1.nd2 (series 16)].ome.tif_Pax3Quant.csv	0.92721	0.063892791
PD-100_C59-2_48_2019-08-22_2ndary_D5_0-48h_plate3_run1.nd2 [2019-08-22_2ndary_D5_0-48h_plate3_run1.nd2 (series 17)].ome.tif_Pax3Quant.csv	0.90101	0.059358438
PD-100_C59-2_48_2019-08-22_2ndary_D5_0-48h_plate3_run1.nd2 [2019-08-22_2ndary_D5_0-48h_plate3_run1.nd2 (series 18)].ome.tif_Pax3Quant.csv	0.92181	0.095956397
PD-100_C59-2_48_2019-08-22_2ndary_D5_0-48h_plate3_run1.nd2 [2019-08-22_2ndary_D5_0-48h_plate3_run1.nd2 (series 18)].ome.tif_Pax3Quant.csv	NA
PD-100_C59-2_48_2019-08-22_2ndary_D5_0-48h_plate3_run1.nd2 [2019-08-22_2ndary_D5_0-48h_plate3_run1.nd2 (series 18)].ome.tif_Pax3Quant.csv	NA
PD-100_XAV-1_A83_48_2019-08-23_2ndary_D5_0-48h_plate3_run2.nd2 [2019-08-23_2ndary_D5_0-48h_plate3_run2.nd2 (series 05)].ome.tif_Pax3Quant.csv	0.89191	0.03580985
PD-100_XAV-1_A83_48_2019-08-23_2ndary_D5_0-48h_plate3_run2.nd2 [2019-08-23_2ndary_D5_0-48h_plate3_run2.nd2 (series 06)].ome.tif_Pax3Quant.csv	0.88056	0.028483672
PD-100_XAV-1_A83_48_2019-08-23_2ndary_D5_0-48h_plate3_run2.nd2 [2019-08-23_2ndary_D5_0-48h_plate3_run2.nd2 (series 07)].ome.tif_Pax3Quant.csv	0.90144	0.036195407
PD-100_XAV-1_A83_LDN_48_2019-08-23_2ndary_D5_0-48h_plate3_run2.nd2 [2019-08-23_2ndary_D5_0-48h_plate3_run2.nd2 (series 11)].ome.tif_Pax3Quant.csv	0.92309	0.043224127
PD-100_XAV-1_A83_LDN_48_2019-08-23_2ndary_D5_0-48h_plate3_run2.nd2 [2019-08-23_2ndary_D5_0-48h_plate3_run2.nd2 (series 12)].ome.tif_Pax3Quant.csv	0.90909	0.03266917
PD-100_XAV-2_A83_48_2019-08-23_2ndary_D5_0-48h_plate3_run2.nd2 [2019-08-23_2ndary_D5_0-48h_plate3_run2.nd2 (series 26)].ome.tif_Pax3Quant.csv	0.8371	0.030286344
PD-100_XAV-2_A83_48_2019-08-23_2ndary_D5_0-48h_plate3_run2.nd2 [2019-08-23_2ndary_D5_0-48h_plate3_run2.nd2 (series 27)].ome.tif_Pax3Quant.csv	0.88043	0.031671373
PD-100_XAV-2_A83_48_2019-08-23_2ndary_D5_0-48h_plate3_run2.nd2 [2019-08-23_2ndary_D5_0-48h_plate3_run2.nd2 (series 28)].ome.tif_Pax3Quant.csv	0.92139	0.046636548
PD-100_XAV-2_A83_LDN_48_2019-08-23_2ndary_D5_0-48h_plate3_run2.nd2 [2019-08-23_2ndary_D5_0-48h_plate3_run2.nd2 (series 20)].ome.tif_Pax3Quant.csv	0.87885	0.0284173
PD-100_XAV-2_A83_LDN_48_2019-08-23_2ndary_D5_0-48h_plate3_run2.nd2 [2019-08-23_2ndary_D5_0-48h_plate3_run2.nd2 (series 21)].ome.tif_Pax3Quant.csv	0.85166	0.034576287
PD-250_48_2019-08-22_2ndary_D5_0-48h_plate3_run1.nd2 [2019-08-22_2ndary_D5_0-48h_plate3_run1.nd2 (series 25)].ome.tif_Pax3Quant.csv	0.95504	0.067508311
PD-250_48_2019-08-22_2ndary_D5_0-48h_plate3_run1.nd2 [2019-08-22_2ndary_D5_0-48h_plate3_run1.nd2 (series 26)].ome.tif_Pax3Quant.csv	0.92497	0.063113407
PD-250_48_2019-08-22_2ndary_D5_0-48h_plate3_run1.nd2 [2019-08-22_2ndary_D5_0-48h_plate3_run1.nd2 (series 27)].ome.tif_Pax3Quant.csv	0.95758	0.070973203
PD-250_48_2019-08-22_2ndary_D5_0-48h_plate3_run1.nd2 [2019-08-22_2ndary_D5_0-48h_plate3_run1.nd2 (series 27)].ome.tif_Pax3Quant.csv	NA
PD-250_48_2019-08-22_2ndary_D5_0-48h_plate3_run1.nd2 [2019-08-22_2ndary_D5_0-48h_plate3_run1.nd2 (series 27)].ome.tif_Pax3Quant.csv	NA
PD-250_C59-1_48_2019-08-23_2ndary_D5_0-48h_plate3_run2.nd2 [2019-08-23_2ndary_D5_0-48h_plate3_run2.nd2 (series 02)].ome.tif_Pax3Quant.csv	0.78127	0.015710676
PD-250_C59-1_48_2019-08-23_2ndary_D5_0-48h_plate3_run2.nd2 [2019-08-23_2ndary_D5_0-48h_plate3_run2.nd2 (series 03)].ome.tif_Pax3Quant.csv	0.80212	0.027419775
PD-250_C59-1_48_2019-08-23_2ndary_D5_0-48h_plate3_run2.nd2 [2019-08-23_2ndary_D5_0-48h_plate3_run2.nd2 (series 04)].ome.tif_Pax3Quant.csv	0.82579	0.025906317
PD-250_C59-1_48_2019-08-23_2ndary_D5_0-48h_plate3_run2.nd2 [2019-08-23_2ndary_D5_0-48h_plate3_run2.nd2 (series 04)].ome.tif_Pax3Quant.csv	NA
PD-250_C59-1_48_2019-08-23_2ndary_D5_0-48h_plate3_run2.nd2 [2019-08-23_2ndary_D5_0-48h_plate3_run2.nd2 (series 04)].ome.tif_Pax3Quant.csv	NA
PD-250_C59-2_48_2019-08-23_2ndary_D5_0-48h_plate3_run2.nd2 [2019-08-23_2ndary_D5_0-48h_plate3_run2.nd2 (series 29)].ome.tif_Pax3Quant.csv	0.73742	0.024988959
PD-250_C59-2_48_2019-08-23_2ndary_D5_0-48h_plate3_run2.nd2 [2019-08-23_2ndary_D5_0-48h_plate3_run2.nd2 (series 30)].ome.tif_Pax3Quant.csv	0.74004	0.025463747
PD-250_C59-2_48_2019-08-23_2ndary_D5_0-48h_plate3_run2.nd2 [2019-08-23_2ndary_D5_0-48h_plate3_run2.nd2 (series 31)].ome.tif_Pax3Quant.csv	0.73562	0.022490303
PD-250_C59-2_48_2019-08-23_2ndary_D5_0-48h_plate3_run2.nd2 [2019-08-23_2ndary_D5_0-48h_plate3_run2.nd2 (series 31)].ome.tif_Pax3Quant.csv	NA
PD-250_C59-2_48_2019-08-23_2ndary_D5_0-48h_plate3_run2.nd2 [2019-08-23_2ndary_D5_0-48h_plate3_run2.nd2 (series 31)].ome.tif_Pax3Quant.csv	NA
PD-250_XAV-1_A83_48_2019-08-23_2ndary_D5_0-48h_plate3_run2.nd2 [2019-08-23_2ndary_D5_0-48h_plate3_run2.nd2 (series 08)].ome.tif_Pax3Quant.csv	0.8735	0.027128761
PD-250_XAV-1_A83_48_2019-08-23_2ndary_D5_0-48h_plate3_run2.nd2 [2019-08-23_2ndary_D5_0-48h_plate3_run2.nd2 (series 09)].ome.tif_Pax3Quant.csv	0.93466	0.039266821
PD-250_XAV-1_A83_48_2019-08-23_2ndary_D5_0-48h_plate3_run2.nd2 [2019-08-23_2ndary_D5_0-48h_plate3_run2.nd2 (series 10)].ome.tif_Pax3Quant.csv	0.90734	0.033853583
PD-250_XAV-1_A83_LDN_48_2019-08-23_2ndary_D5_0-48h_plate3_run2.nd2 [2019-08-23_2ndary_D5_0-48h_plate3_run2.nd2 (series 14)].ome.tif_Pax3Quant.csv	0.82255	0.017423063
PD-250_XAV-1_A83_LDN_48_2019-08-23_2ndary_D5_0-48h_plate3_run2.nd2 [2019-08-23_2ndary_D5_0-48h_plate3_run2.nd2 (series 15)].ome.tif_Pax3Quant.csv	0.84403	0.022452848
PD-250_XAV-2_A83_48_2019-08-23_2ndary_D5_0-48h_plate3_run2.nd2 [2019-08-23_2ndary_D5_0-48h_plate3_run2.nd2 (series 23)].ome.tif_Pax3Quant.csv	0.92452	0.038812286
PD-250_XAV-2_A83_48_2019-08-23_2ndary_D5_0-48h_plate3_run2.nd2 [2019-08-23_2ndary_D5_0-48h_plate3_run2.nd2 (series 24)].ome.tif_Pax3Quant.csv	0.87184	0.029381063
PD-250_XAV-2_A83_48_2019-08-23_2ndary_D5_0-48h_plate3_run2.nd2 [2019-08-23_2ndary_D5_0-48h_plate3_run2.nd2 (series 25)].ome.tif_Pax3Quant.csv	0.84731	0.030721195
PD-250_XAV-2_A83_LDN_48_2019-08-23_2ndary_D5_0-48h_plate3_run2.nd2 [2019-08-23_2ndary_D5_0-48h_plate3_run2.nd2 (series 17)].ome.tif_Pax3Quant.csv	0.75855	0.019787954
PD-250_XAV-2_A83_LDN_48_2019-08-23_2ndary_D5_0-48h_plate3_run2.nd2 [2019-08-23_2ndary_D5_0-48h_plate3_run2.nd2 (series 18)].ome.tif_Pax3Quant.csv	0.74034	0.012240205
XAV-1_48_2019-08-22_2ndary_D5_0-48h_plate3_run1.nd2 [2019-08-22_2ndary_D5_0-48h_plate3_run1.nd2 (series 10)].ome.tif_Pax3Quant.csv	0.89342	0.069734443
XAV-1_48_2019-08-22_2ndary_D5_0-48h_plate3_run1.nd2 [2019-08-22_2ndary_D5_0-48h_plate3_run1.nd2 (series 11)].ome.tif_Pax3Quant.csv	0.9596	0.094118558
XAV-1_48_2019-08-22_2ndary_D5_0-48h_plate3_run1.nd2 [2019-08-22_2ndary_D5_0-48h_plate3_run1.nd2 (series 12)].ome.tif_Pax3Quant.csv	0.92953	0.071138285
XAV-1_48_2019-08-22_2ndary_D5_0-48h_plate3_run1.nd2 [2019-08-22_2ndary_D5_0-48h_plate3_run1.nd2 (series 19)].ome.tif_Pax3Quant.csv	1.01472	0.080386953
XAV-1_48_2019-08-22_2ndary_D5_0-48h_plate3_run1.nd2 [2019-08-22_2ndary_D5_0-48h_plate3_run1.nd2 (series 20)].ome.tif_Pax3Quant.csv	1.02632	0.102851946
C59-1_24+24_2019-08-16_2ndary_D5_0-24h_plate1.nd2 [2019-08-16_2ndary_D5_0-24h_plate1.nd2 (series 12)].ome.tif_Pax3Quant.csv	1.18655	0.086509458
C59-1_24+24_2019-08-16_2ndary_D5_0-24h_plate1.nd2 [2019-08-16_2ndary_D5_0-24h_plate1.nd2 (series 13)].ome.tif_Pax3Quant.csv	1.22721	0.102668762
C59-1_24+24_2019-08-16_2ndary_D5_0-24h_plate1.nd2 [2019-08-16_2ndary_D5_0-24h_plate1.nd2 (series 14)].ome.tif_Pax3Quant.csv	1.21015	0.094693805
C59-1_24+24_2019-08-16_2ndary_D5_0-24h_plate1.nd2 [2019-08-16_2ndary_D5_0-24h_plate1.nd2 (series 15)].ome.tif_Pax3Quant.csv	1.19536	0.089855498
C59-1_24+24_2019-08-16_2ndary_D5_0-24h_plate1.nd2 [2019-08-16_2ndary_D5_0-24h_plate1.nd2 (series 16)].ome.tif_Pax3Quant.csv	1.17497	0.087739796
C59-2_24+24_2019-08-16_2ndary_D5_0-24h_plate1.nd2 [2019-08-16_2ndary_D5_0-24h_plate1.nd2 (series 39)].ome.tif_Pax3Quant.csv	1.06191	0.087166982
C59-2_24+24_2019-08-16_2ndary_D5_0-24h_plate1.nd2 [2019-08-16_2ndary_D5_0-24h_plate1.nd2 (series 40)].ome.tif_Pax3Quant.csv	1.23167	0.115695006
C59-2_24+24_2019-08-16_2ndary_D5_0-24h_plate1.nd2 [2019-08-16_2ndary_D5_0-24h_plate1.nd2 (series 41)].ome.tif_Pax3Quant.csv	1.31413	0.132642045
C59-2_24+24_2019-08-16_2ndary_D5_0-24h_plate1.nd2 [2019-08-16_2ndary_D5_0-24h_plate1.nd2 (series 42)].ome.tif_Pax3Quant.csv	1.22193	0.111543193
C59-2_24+24_2019-08-16_2ndary_D5_0-24h_plate1.nd2 [2019-08-16_2ndary_D5_0-24h_plate1.nd2 (series 43)].ome.tif_Pax3Quant.csv	1.09004	0.08915336
CFL_24+24_2019-08-16_2ndary_D5_0-24h_plate1.nd2 [2019-08-16_2ndary_D5_0-24h_plate1.nd2 (series 50)].ome.tif_Pax3Quant.csv	1.52742	0.169582564
CFL_24+24_2019-08-16_2ndary_D5_0-24h_plate1.nd2 [2019-08-16_2ndary_D5_0-24h_plate1.nd2 (series 51)].ome.tif_Pax3Quant.csv	1.42854	0.162184919
CFL_24+24_2019-08-16_2ndary_D5_0-24h_plate1.nd2 [2019-08-16_2ndary_D5_0-24h_plate1.nd2 (series 52)].ome.tif_Pax3Quant.csv	1.44268	0.173471907
CFL_24+24_2019-08-16_2ndary_D5_0-24h_plate1.nd2 [2019-08-16_2ndary_D5_0-24h_plate1.nd2 (series 54)].ome.tif_Pax3Quant.csv	1.50463	0.168916312
CFL_24+24_2019-08-16_2ndary_D5_0-24h_plate1.nd2 [2019-08-16_2ndary_D5_0-24h_plate1.nd2 (series 55)].ome.tif_Pax3Quant.csv	1.57427	0.177202324
CFL_24+24_2019-08-16_2ndary_D5_0-24h_plate1.nd2 [2019-08-16_2ndary_D5_0-24h_plate1.nd2 (series 03)].ome.tif_Pax3Quant.csv	1.1651	0.039367345
CFL_24+24_2019-08-16_2ndary_D5_0-24h_plate1.nd2 [2019-08-16_2ndary_D5_0-24h_plate1.nd2 (series 04)].ome.tif_Pax3Quant.csv	1.18294	0.035588223
CFL_24+24_2019-08-16_2ndary_D5_0-24h_plate1.nd2 [2019-08-16_2ndary_D5_0-24h_plate1.nd2 (series 05)].ome.tif_Pax3Quant.csv	1.22356	0.046797289
CFL_24+24_2019-08-16_2ndary_D5_0-24h_plate1.nd2 [2019-08-16_2ndary_D5_0-24h_plate1.nd2 (series 06)].ome.tif_Pax3Quant.csv	1.23655	0.070363612
CFL_24+24_2019-08-16_2ndary_D5_0-24h_plate1.nd2 [2019-08-16_2ndary_D5_0-24h_plate1.nd2 (series 53)].ome.tif_Pax3Quant.csv	1.38727	0.152505662
PD-100_24+24_2019-08-16_2ndary_D5_0-24h_plate1.nd2 [2019-08-16_2ndary_D5_0-24h_plate1.nd2 (series 07)].ome.tif_Pax3Quant.csv	1.07815	0.030549637
PD-100_24+24_2019-08-16_2ndary_D5_0-24h_plate1.nd2 [2019-08-16_2ndary_D5_0-24h_plate1.nd2 (series 08)].ome.tif_Pax3Quant.csv	1.1121	0.054425466
PD-100_24+24_2019-08-16_2ndary_D5_0-24h_plate1.nd2 [2019-08-16_2ndary_D5_0-24h_plate1.nd2 (series 09)].ome.tif_Pax3Quant.csv	1.1327	0.072817955
PD-100_24+24_2019-08-16_2ndary_D5_0-24h_plate1.nd2 [2019-08-16_2ndary_D5_0-24h_plate1.nd2 (series 10)].ome.tif_Pax3Quant.csv	1.1174	0.059031579
PD-100_24+24_2019-08-16_2ndary_D5_0-24h_plate1.nd2 [2019-08-16_2ndary_D5_0-24h_plate1.nd2 (series 11)].ome.tif_Pax3Quant.csv	1.07586	0.060280828
PD-100_C59-1_24+24_2019-08-16_2ndary_D5_0-24h_plate1.nd2 [2019-08-16_2ndary_D5_0-24h_plate1.nd2 (series 24)].ome.tif_Pax3Quant.csv	1.18357	0.083811146
PD-100_C59-1_24+24_2019-08-16_2ndary_D5_0-24h_plate1.nd2 [2019-08-16_2ndary_D5_0-24h_plate1.nd2 (series 25)].ome.tif_Pax3Quant.csv	1.14461	0.091456221
PD-100_C59-1_24+24_2019-08-16_2ndary_D5_0-24h_plate1.nd2 [2019-08-16_2ndary_D5_0-24h_plate1.nd2 (series 26)].ome.tif_Pax3Quant.csv	1.11698	0.088430533
PD-100_C59-1_24+24_2019-08-16_2ndary_D5_0-24h_plate1.nd2 [2019-08-16_2ndary_D5_0-24h_plate1.nd2 (series 27)].ome.tif_Pax3Quant.csv	1.16609	0.08975242
PD-100_C59-1_24+24_2019-08-16_2ndary_D5_0-24h_plate1.nd2 [2019-08-16_2ndary_D5_0-24h_plate1.nd2 (series 28)].ome.tif_Pax3Quant.csv	1.16626	0.086486365
PD-100_C59-2_24+24_2019-08-16_2ndary_D5_0-24h_plate1.nd2 [2019-08-16_2ndary_D5_0-24h_plate1.nd2 (series 29)].ome.tif_Pax3Quant.csv	1.14292	0.093778342
PD-100_C59-2_24+24_2019-08-16_2ndary_D5_0-24h_plate1.nd2 [2019-08-16_2ndary_D5_0-24h_plate1.nd2 (series 30)].ome.tif_Pax3Quant.csv	0.98705	0.05905337
PD-100_C59-2_24+24_2019-08-16_2ndary_D5_0-24h_plate1.nd2 [2019-08-16_2ndary_D5_0-24h_plate1.nd2 (series 31)].ome.tif_Pax3Quant.csv	1.06614	0.07751025
PD-100_C59-2_24+24_2019-08-16_2ndary_D5_0-24h_plate1.nd2 [2019-08-16_2ndary_D5_0-24h_plate1.nd2 (series 32)].ome.tif_Pax3Quant.csv	1.08739	0.079782519
PD-100_C59-2_24+24_2019-08-16_2ndary_D5_0-24h_plate1.nd2 [2019-08-16_2ndary_D5_0-24h_plate1.nd2 (series 33)].ome.tif_Pax3Quant.csv	1.04496	0.074461558
PD-100_X-1,A83_24+242019-08-17_2ndary_D5_0-24h_plate1.nd2 [2019-08-17_2ndary_D5_0-24h_plate1.nd2 (series 05)].ome.tif_Pax3Quant.csv	0.89948	0.071982248
PD-100_X-1,A83_24+242019-08-17_2ndary_D5_0-24h_plate1.nd2 [2019-08-17_2ndary_D5_0-24h_plate1.nd2 (series 06)].ome.tif_Pax3Quant.csv	0.88841	0.052113143
PD-100_X-1,A83_24+242019-08-17_2ndary_D5_0-24h_plate1.nd2 [2019-08-17_2ndary_D5_0-24h_plate1.nd2 (series 07)].ome.tif_Pax3Quant.csv	0.88157	0.065616772
PD-100_X-1,A83_24+242019-08-17_2ndary_D5_0-24h_plate1.nd2 [2019-08-17_2ndary_D5_0-24h_plate1.nd2 (series 08)].ome.tif_Pax3Quant.csv	0.84722	0.049679087
PD-100_X-1,A83_24+242019-08-17_2ndary_D5_0-24h_plate1.nd2 [2019-08-17_2ndary_D5_0-24h_plate1.nd2 (series 08)].ome.tif_Pax3Quant.csv	NA
PD-100_X-1,A83,LDN_24+242019-08-17_2ndary_D5_0-24h_plate1.nd2 [2019-08-17_2ndary_D5_0-24h_plate1.nd2 (series 13)].ome.tif_Pax3Quant.csv	0.78493	0.027708167
PD-100_X-1,A83,LDN_24+242019-08-17_2ndary_D5_0-24h_plate1.nd2 [2019-08-17_2ndary_D5_0-24h_plate1.nd2 (series 14)].ome.tif_Pax3Quant.csv	0.79864	0.028496507
PD-100_X-1,A83,LDN_24+242019-08-17_2ndary_D5_0-24h_plate1.nd2 [2019-08-17_2ndary_D5_0-24h_plate1.nd2 (series 15)].ome.tif_Pax3Quant.csv	0.83733	0.035031027
PD-100_X-1,A83,LDN_24+242019-08-17_2ndary_D5_0-24h_plate1.nd2 [2019-08-17_2ndary_D5_0-24h_plate1.nd2 (series 16)].ome.tif_Pax3Quant.csv	0.82952	0.031303493
PD-100_X-1,A83,LDN_24+242019-08-17_2ndary_D5_0-24h_plate1.nd2 [2019-08-17_2ndary_D5_0-24h_plate1.nd2 (series 17)].ome.tif_Pax3Quant.csv	0.82188	0.02797231
PD-100_X-2_A83_24+24_2019-08-19_2ndary_D5_0-24h_plate1_run3.nd2 [2019-08-19_2ndary_D5_0-24h_plate1_run3.nd2 (series 17)].ome.tif_Pax3Quant.csv	0.82972	0.019179682
PD-100_X-2_A83_24+24_2019-08-19_2ndary_D5_0-24h_plate1_run3.nd2 [2019-08-19_2ndary_D5_0-24h_plate1_run3.nd2 (series 17)].ome.tif_Pax3Quant.csv	NA
PD-100_X-2_A83_24+24_2019-08-19_2ndary_D5_0-24h_plate1_run3.nd2 [2019-08-19_2ndary_D5_0-24h_plate1_run3.nd2 (series 17)].ome.tif_Pax3Quant.csv	NA
PD-100_X-2_A83_24+24_2019-08-19_2ndary_D5_0-24h_plate1_run3.nd2 [2019-08-19_2ndary_D5_0-24h_plate1_run3.nd2 (series 17)].ome.tif_Pax3Quant.csv	NA
PD-100_X-2_A83_24+24_2019-08-19_2ndary_D5_0-24h_plate1_run3.nd2 [2019-08-19_2ndary_D5_0-24h_plate1_run3.nd2 (series 17)].ome.tif_Pax3Quant.csv	NA
PD-100_X-2_A83_LDN_24+24_2019-08-19_2ndary_D5_0-24h_plate1_run3.nd2 [2019-08-19_2ndary_D5_0-24h_plate1_run3.nd2 (series 09)].ome.tif_Pax3Quant.csv	0.84406	0.013981821
PD-100_X-2_A83_LDN_24+24_2019-08-19_2ndary_D5_0-24h_plate1_run3.nd2 [2019-08-19_2ndary_D5_0-24h_plate1_run3.nd2 (series 10)].ome.tif_Pax3Quant.csv	0.85699	0.015942127
PD-100_X-2_A83_LDN_24+24_2019-08-19_2ndary_D5_0-24h_plate1_run3.nd2 [2019-08-19_2ndary_D5_0-24h_plate1_run3.nd2 (series 11)].ome.tif_Pax3Quant.csv	0.87615	0.026399179
PD-100_X-2_A83_LDN_24+24_2019-08-19_2ndary_D5_0-24h_plate1_run3.nd2 [2019-08-19_2ndary_D5_0-24h_plate1_run3.nd2 (series 12)].ome.tif_Pax3Quant.csv	0.84806	0.021775169
PD-100_X-2_A83_LDN_24+24_2019-08-19_2ndary_D5_0-24h_plate1_run3.nd2 [2019-08-19_2ndary_D5_0-24h_plate1_run3.nd2 (series 13)].ome.tif_Pax3Quant.csv	0.90393	0.030698355
PD-250_24+24_2019-08-16_2ndary_D5_0-24h_plate1.nd2 [2019-08-16_2ndary_D5_0-24h_plate1.nd2 (series 45)].ome.tif_Pax3Quant.csv	1.1537	0.097075572
PD-250_24+24_2019-08-16_2ndary_D5_0-24h_plate1.nd2 [2019-08-16_2ndary_D5_0-24h_plate1.nd2 (series 46)].ome.tif_Pax3Quant.csv	0.98181	0.059511937
PD-250_24+24_2019-08-16_2ndary_D5_0-24h_plate1.nd2 [2019-08-16_2ndary_D5_0-24h_plate1.nd2 (series 47)].ome.tif_Pax3Quant.csv	1.00992	0.059522287
PD-250_24+24_2019-08-16_2ndary_D5_0-24h_plate1.nd2 [2019-08-16_2ndary_D5_0-24h_plate1.nd2 (series 48)].ome.tif_Pax3Quant.csv	0.99184	0.065614688
PD-250_24+24_2019-08-16_2ndary_D5_0-24h_plate1.nd2 [2019-08-16_2ndary_D5_0-24h_plate1.nd2 (series 49)].ome.tif_Pax3Quant.csv	0.96775	0.051235912
PD-250_C59-1_24+24_2019-08-17_2ndary_D5_0-24h_plate1.nd2 [2019-08-17_2ndary_D5_0-24h_plate1.nd2 (series 01)].ome.tif_Pax3Quant.csv	0.83882	0.053188512
PD-250_C59-1_24+24_2019-08-17_2ndary_D5_0-24h_plate1.nd2 [2019-08-17_2ndary_D5_0-24h_plate1.nd2 (series 02)].ome.tif_Pax3Quant.csv	0.80277	0.041750063
PD-250_C59-1_24+24_2019-08-17_2ndary_D5_0-24h_plate1.nd2 [2019-08-17_2ndary_D5_0-24h_plate1.nd2 (series 03)].ome.tif_Pax3Quant.csv	0.80083	0.034808583
PD-250_C59-1_24+24_2019-08-17_2ndary_D5_0-24h_plate1.nd2 [2019-08-17_2ndary_D5_0-24h_plate1.nd2 (series 04)].ome.tif_Pax3Quant.csv	0.8451	0.042438904
PD-250_C59-1_24+24_2019-08-17_2ndary_D5_0-24h_plate1.nd2 [2019-08-17_2ndary_D5_0-24h_plate1.nd2 (series 04)].ome.tif_Pax3Quant.csv	NA
PD-250_C59-2_24+24_2019-08-19_2ndary_D5_0-24h_plate1_run3.nd2 [2019-08-19_2ndary_D5_0-24h_plate1_run3.nd2 (series 18)].ome.tif_Pax3Quant.csv	0.88911	0.026930098
PD-250_C59-2_24+24_2019-08-19_2ndary_D5_0-24h_plate1_run3.nd2 [2019-08-19_2ndary_D5_0-24h_plate1_run3.nd2 (series 19)].ome.tif_Pax3Quant.csv	0.82268	0.017439002
PD-250_C59-2_24+24_2019-08-19_2ndary_D5_0-24h_plate1_run3.nd2 [2019-08-19_2ndary_D5_0-24h_plate1_run3.nd2 (series 20)].ome.tif_Pax3Quant.csv	0.78257	0.014972874
PD-250_C59-2_24+24_2019-08-19_2ndary_D5_0-24h_plate1_run3.nd2 [2019-08-19_2ndary_D5_0-24h_plate1_run3.nd2 (series 21)].ome.tif_Pax3Quant.csv	0.79763	0.014345418
PD-250_C59-2_24+24_2019-08-19_2ndary_D5_0-24h_plate1_run3.nd2 [2019-08-19_2ndary_D5_0-24h_plate1_run3.nd2 (series 21)].ome.tif_Pax3Quant.csv	NA
PD-250_X-1_A83_LDN_24+24_2019-08-19_2ndary_D5_0-24h_plate1_run3.nd2 [2019-08-19_2ndary_D5_0-24h_plate1_run3.nd2 (series 01)].ome.tif_Pax3Quant.csv	0.79253	0.018285312
PD-250_X-1_A83_LDN_24+24_2019-08-19_2ndary_D5_0-24h_plate1_run3.nd2 [2019-08-19_2ndary_D5_0-24h_plate1_run3.nd2 (series 02)].ome.tif_Pax3Quant.csv	0.81505	0.018222184
PD-250_X-1_A83_LDN_24+24_2019-08-19_2ndary_D5_0-24h_plate1_run3.nd2 [2019-08-19_2ndary_D5_0-24h_plate1_run3.nd2 (series 03)].ome.tif_Pax3Quant.csv	0.87514	0.022948348
PD-250_X-1_A83_LDN_24+24_2019-08-19_2ndary_D5_0-24h_plate1_run3.nd2 [2019-08-19_2ndary_D5_0-24h_plate1_run3.nd2 (series 04)].ome.tif_Pax3Quant.csv	0.82234	0.015805778
PD-250_X-1_A83_LDN_24+24_2019-08-19_2ndary_D5_0-24h_plate1_run3.nd2 [2019-08-19_2ndary_D5_0-24h_plate1_run3.nd2 (series 05)].ome.tif_Pax3Quant.csv	0.8258	0.013706151
PD-250_X-1,A83_24+24_2019-08-17_2ndary_D5_0-24h_plate1.nd2 [2019-08-17_2ndary_D5_0-24h_plate1.nd2 (series 09)].ome.tif_Pax3Quant.csv	0.84308	0.048459226
PD-250_X-1,A83_24+24_2019-08-17_2ndary_D5_0-24h_plate1.nd2 [2019-08-17_2ndary_D5_0-24h_plate1.nd2 (series 10)].ome.tif_Pax3Quant.csv	0.85044	0.052411025
PD-250_X-1,A83_24+24_2019-08-17_2ndary_D5_0-24h_plate1.nd2 [2019-08-17_2ndary_D5_0-24h_plate1.nd2 (series 11)].ome.tif_Pax3Quant.csv	0.85924	0.04353963
PD-250_X-1,A83_24+24_2019-08-17_2ndary_D5_0-24h_plate1.nd2 [2019-08-17_2ndary_D5_0-24h_plate1.nd2 (series 12)].ome.tif_Pax3Quant.csv	0.82723	0.036645133
PD-250_X-1,A83_24+24_2019-08-17_2ndary_D5_0-24h_plate1.nd2 [2019-08-17_2ndary_D5_0-24h_plate1.nd2 (series 12)].ome.tif_Pax3Quant.csv	NA
PD-250_X-2_A83_24+24_2019-08-19_2ndary_D5_0-24h_plate1_run3.nd2 [2019-08-19_2ndary_D5_0-24h_plate1_run3.nd2 (series 14)].ome.tif_Pax3Quant.csv	0.79859	0.011172744
PD-250_X-2_A83_24+24_2019-08-19_2ndary_D5_0-24h_plate1_run3.nd2 [2019-08-19_2ndary_D5_0-24h_plate1_run3.nd2 (series 15)].ome.tif_Pax3Quant.csv	0.83568	0.013440388
PD-250_X-2_A83_24+24_2019-08-19_2ndary_D5_0-24h_plate1_run3.nd2 [2019-08-19_2ndary_D5_0-24h_plate1_run3.nd2 (series 16)].ome.tif_Pax3Quant.csv	0.85327	0.020680277
PD-250_X-2_A83_24+24_2019-08-19_2ndary_D5_0-24h_plate1_run3.nd2 [2019-08-19_2ndary_D5_0-24h_plate1_run3.nd2 (series 16)].ome.tif_Pax3Quant.csv	NA
PD-250_X-2_A83_24+24_2019-08-19_2ndary_D5_0-24h_plate1_run3.nd2 [2019-08-19_2ndary_D5_0-24h_plate1_run3.nd2 (series 16)].ome.tif_Pax3Quant.csv	NA
PD-250_X-2_A83_LDN_24+24_2019-08-19_2ndary_D5_0-24h_plate1_run3.nd2 [2019-08-19_2ndary_D5_0-24h_plate1_run3.nd2 (series 06)].ome.tif_Pax3Quant.csv	0.89699	0.030453639
PD-250_X-2_A83_LDN_24+24_2019-08-19_2ndary_D5_0-24h_plate1_run3.nd2 [2019-08-19_2ndary_D5_0-24h_plate1_run3.nd2 (series 07)].ome.tif_Pax3Quant.csv	0.88414	0.025058727
PD-250_X-2_A83_LDN_24+24_2019-08-19_2ndary_D5_0-24h_plate1_run3.nd2 [2019-08-19_2ndary_D5_0-24h_plate1_run3.nd2 (series 08)].ome.tif_Pax3Quant.csv	0.85695	0.023191506
PD-250_X-2_A83_LDN_24+24_2019-08-19_2ndary_D5_0-24h_plate1_run3.nd2 [2019-08-19_2ndary_D5_0-24h_plate1_run3.nd2 (series 08)].ome.tif_Pax3Quant.csv	NA
PD-250_X-2_A83_LDN_24+24_2019-08-19_2ndary_D5_0-24h_plate1_run3.nd2 [2019-08-19_2ndary_D5_0-24h_plate1_run3.nd2 (series 08)].ome.tif_Pax3Quant.csv	NA
XAV-1_24+24_2019-08-16_2ndary_D5_0-24h_plate1.nd2 [2019-08-16_2ndary_D5_0-24h_plate1.nd2 (series 18)].ome.tif_Pax3Quant.csv	1.26884	0.108051869
XAV-1_24+24_2019-08-16_2ndary_D5_0-24h_plate1.nd2 [2019-08-16_2ndary_D5_0-24h_plate1.nd2 (series 19)].ome.tif_Pax3Quant.csv	1.20393	0.097239084
XAV-1_24+24_2019-08-16_2ndary_D5_0-24h_plate1.nd2 [2019-08-16_2ndary_D5_0-24h_plate1.nd2 (series 20)].ome.tif_Pax3Quant.csv	1.25369	0.118999168
XAV-1_24+24_2019-08-16_2ndary_D5_0-24h_plate1.nd2 [2019-08-16_2ndary_D5_0-24h_plate1.nd2 (series 21)].ome.tif_Pax3Quant.csv	1.24613	0.109453062
XAV-1_24+24_2019-08-16_2ndary_D5_0-24h_plate1.nd2 [2019-08-16_2ndary_D5_0-24h_plate1.nd2 (series 22)].ome.tif_Pax3Quant.csv	1.23193	0.103639064
XAV-2_24+24_2019-08-16_2ndary_D5_0-24h_plate1.nd2 [2019-08-16_2ndary_D5_0-24h_plate1.nd2 (series 34)].ome.tif_Pax3Quant.csv	1.1627	0.112638557
XAV-2_24+24_2019-08-16_2ndary_D5_0-24h_plate1.nd2 [2019-08-16_2ndary_D5_0-24h_plate1.nd2 (series 35)].ome.tif_Pax3Quant.csv	1.18431	0.10703966
XAV-2_24+24_2019-08-16_2ndary_D5_0-24h_plate1.nd2 [2019-08-16_2ndary_D5_0-24h_plate1.nd2 (series 36)].ome.tif_Pax3Quant.csv	1.14755	0.109742156
XAV-2_24+24_2019-08-16_2ndary_D5_0-24h_plate1.nd2 [2019-08-16_2ndary_D5_0-24h_plate1.nd2 (series 37)].ome.tif_Pax3Quant.csv	1.1375	0.109628528
XAV-2_24+24_2019-08-16_2ndary_D5_0-24h_plate1.nd2 [2019-08-16_2ndary_D5_0-24h_plate1.nd2 (series 38)].ome.tif_Pax3Quant.csv	1.08843	0.094218342
