# Supplementary material for: Paraxial mesoderm organoids model development of human somites
Source: eLife. 2022 Jan 28;11:e68925. doi: 10.7554/eLife.68925 (PMC8906808; doi:10.7554/eLife.68925)
Supplement: Figure 3—source data 2. [file elife-68925-fig3-data2.csv]

image_id	OrganoidType	Treatment	channel	MeanInt	SDMeantInt	MinInt	SDMinInt	MaxInt	SDMaxInt	Average_XRadius	Average_YRadius	Average_Area	SD_XRadius	SD_YRadius	SD_Area	OrganoidSomiteCount	AvgSomiteCount	SDSomiteCount
996751	C59-1	24+24	FITC	829.000918067443	253.725779898288	198.615384615385	92.465810729405	3537.69230769231	719.954541299978	30.0484667214928	28.2323128453362	1095.2260176828	5.8766963156623	6.47720905272212	1095.2260176828	7	4.33333333333333	1.66969421987344
996751	C59-1	24+24	TRITC	1080.00200185287	268.213519501773	364.923076923077	74.1516948299487	2821.57692307692	828.484166321936	30.0484667214928	28.2323128453362	1095.2260176828	5.8766963156623	6.47720905272212	1095.2260176828	7	4.33333333333333	1.66969421987344
996752	C59-1	24+24	FITC	829.000918067443	253.725779898288	198.615384615385	92.465810729405	3537.69230769231	719.954541299978	39.3395925314491	33.1734015930925	1749.08596101743	14.2456175183276	8.82043053301741	1749.08596101743	5	4.33333333333333	1.66969421987344
996752	C59-1	24+24	TRITC	1080.00200185287	268.213519501773	364.923076923077	74.1516948299487	2821.57692307692	828.484166321936	39.3395925314491	33.1734015930925	1749.08596101743	14.2456175183276	8.82043053301741	1749.08596101743	5	4.33333333333333	1.66969421987344
996753	C59-1	24+24	FITC	829.000918067443	253.725779898288	198.615384615385	92.465810729405	3537.69230769231	719.954541299978	42.0325836603624	44.1105798728586	2372.07131122036	8.19278539112023	7.73084843363613	2372.07131122036	4	4.33333333333333	1.66969421987344
996753	C59-1	24+24	TRITC	1080.00200185287	268.213519501773	364.923076923077	74.1516948299487	2821.57692307692	828.484166321936	42.0325836603624	44.1105798728586	2372.07131122036	8.19278539112023	7.73084843363613	2372.07131122036	4	4.33333333333333	1.66969421987344
996754	C59-1	24+24	FITC	829.000918067443	253.725779898288	198.615384615385	92.465810729405	3537.69230769231	719.954541299978	38.6273316574169	41.5621243215574	2159.65278606526	14.0726034001517	12.5765278734592	2159.65278606526	2	4.33333333333333	1.66969421987344
996754	C59-1	24+24	TRITC	1080.00200185287	268.213519501773	364.923076923077	74.1516948299487	2821.57692307692	828.484166321936	38.6273316574169	41.5621243215574	2159.65278606526	14.0726034001517	12.5765278734592	2159.65278606526	2	4.33333333333333	1.66969421987344
996755	C59-1	24+24	FITC	829.000918067443	253.725779898288	198.615384615385	92.465810729405	3537.69230769231	719.954541299978	44.1721681636623	38.6879733417583	2364.49692447846	19.6101184396385	11.1168888806129	2364.49692447846	5	4.33333333333333	1.66969421987344
996755	C59-1	24+24	TRITC	1080.00200185287	268.213519501773	364.923076923077	74.1516948299487	2821.57692307692	828.484166321936	44.1721681636623	38.6879733417583	2364.49692447846	19.6101184396385	11.1168888806129	2364.49692447846	5	4.33333333333333	1.66969421987344
996756	C59-1	24+24	FITC	829.000918067443	253.725779898288	198.615384615385	92.465810729405	3537.69230769231	719.954541299978	37.7334350902648	38.865438862681	1829.12486671452	5.41314362428518	4.78489977919662	1829.12486671452	3	4.33333333333333	1.66969421987344
996756	C59-1	24+24	TRITC	1080.00200185287	268.213519501773	364.923076923077	74.1516948299487	2821.57692307692	828.484166321936	37.7334350902648	38.865438862681	1829.12486671452	5.41314362428518	4.78489977919662	1829.12486671452	3	4.33333333333333	1.66969421987344
996778	C59-2	24+24	FITC	773.65712374735	306.831906338722	162.261904761905	105.927047957386	3176.47619047619	851.10680416867	43.6905855291122	44.5352251778749	2464.16577594965	9.10067153123788	7.32394689312162	2464.16577594965	7	7	1.70560573084488
996778	C59-2	24+24	TRITC	1115.52787284218	364.971850047478	321.261904761905	105.141266068227	2951.42857142857	820.765292580788	43.6905855291122	44.5352251778749	2464.16577594965	9.10067153123788	7.32394689312162	2464.16577594965	7	7	1.70560573084488
996779	C59-2	24+24	FITC	773.65712374735	306.831906338722	162.261904761905	105.927047957386	3176.47619047619	851.10680416867	38.190014614953	38.3613345866457	1844.68658288326	3.84531760186708	5.77094108880213	1844.68658288326	8	7	1.70560573084488
996779	C59-2	24+24	TRITC	1115.52787284218	364.971850047478	321.261904761905	105.141266068227	2951.42857142857	820.765292580788	38.190014614953	38.3613345866457	1844.68658288326	3.84531760186708	5.77094108880213	1844.68658288326	8	7	1.70560573084488
996780	C59-2	24+24	FITC	773.65712374735	306.831906338722	162.261904761905	105.927047957386	3176.47619047619	851.10680416867	45.5925789149037	44.6067930881877	2593.66522646382	9.85627221898089	7.10677766400824	2593.66522646382	9	7	1.70560573084488
996780	C59-2	24+24	TRITC	1115.52787284218	364.971850047478	321.261904761905	105.141266068227	2951.42857142857	820.765292580788	45.5925789149037	44.6067930881877	2593.66522646382	9.85627221898089	7.10677766400824	2593.66522646382	9	7	1.70560573084488
996781	C59-2	24+24	FITC	773.65712374735	306.831906338722	162.261904761905	105.927047957386	3176.47619047619	851.10680416867	41.0135628854977	42.4833855229643	2172.37930593681	4.0104233941841	4.17552690683034	2172.37930593681	8	7	1.70560573084488
996781	C59-2	24+24	TRITC	1115.52787284218	364.971850047478	321.261904761905	105.141266068227	2951.42857142857	820.765292580788	41.0135628854977	42.4833855229643	2172.37930593681	4.0104233941841	4.17552690683034	2172.37930593681	8	7	1.70560573084488
996782	C59-2	24+24	FITC	773.65712374735	306.831906338722	162.261904761905	105.927047957386	3176.47619047619	851.10680416867	48.2823913731682	48.7557408930796	2946.16121222587	4.59632906926832	4.30876550360272	2946.16121222587	4	7	1.70560573084488
996782	C59-2	24+24	TRITC	1115.52787284218	364.971850047478	321.261904761905	105.141266068227	2951.42857142857	820.765292580788	48.2823913731682	48.7557408930796	2946.16121222587	4.59632906926832	4.30876550360272	2946.16121222587	4	7	1.70560573084488
996783	C59-2	24+24	FITC	773.65712374735	306.831906338722	162.261904761905	105.927047957386	3176.47619047619	851.10680416867	34.8677250319788	40.8360644435282	1819.37624180696	5.86448566640528	10.3218585356482	1819.37624180696	6	7	1.70560573084488
996783	C59-2	24+24	TRITC	1115.52787284218	364.971850047478	321.261904761905	105.141266068227	2951.42857142857	820.765292580788	34.8677250319788	40.8360644435282	1819.37624180696	5.86448566640528	10.3218585356482	1819.37624180696	6	7	1.70560573084488
996740	Control	24+24	FITC	1212.63402922616	416.579267095646	299.93023255814	145.585913679634	3600.53488372093	681.970342818229	40.14699300125	41.3545247395833	2083.43189579167	6.53946917265458	5.99888046288769	2083.43189579167	24	14.3333333333333	4.90489255891429
996740	Control	24+24	TRITC	1212.73871194826	281.441348726985	459.936046511628	108.615484031574	2878.25	722.49235715013	40.14699300125	41.3545247395833	2083.43189579167	6.53946917265458	5.99888046288769	2083.43189579167	24	14.3333333333333	4.90489255891429
996741	Control	24+24	FITC	1212.63402922616	416.579267095646	299.93023255814	145.585913679634	3600.53488372093	681.970342818229	50.7053571428571	50.1517857142857	3182.13788804762	5.95557487463014	5.34044841412566	3182.13788804762	21	14.3333333333333	4.90489255891429
996741	Control	24+24	TRITC	1212.73871194826	281.441348726985	459.936046511628	108.615484031574	2878.25	722.49235715013	50.7053571428571	50.1517857142857	3182.13788804762	5.95557487463014	5.34044841412566	3182.13788804762	21	14.3333333333333	4.90489255891429
996742	Control	24+24	FITC	1212.63402922616	416.579267095646	299.93023255814	145.585913679634	3600.53488372093	681.970342818229	44.1565972222222	43.6319444444444	2424.86865772222	7.36697868029982	6.77069327693973	2424.86865772222	18	14.3333333333333	4.90489255891429
996742	Control	24+24	TRITC	1212.73871194826	281.441348726985	459.936046511628	108.615484031574	2878.25	722.49235715013	44.1565972222222	43.6319444444444	2424.86865772222	7.36697868029982	6.77069327693973	2424.86865772222	18	14.3333333333333	4.90489255891429
996743	Control	24+24	FITC	1212.63402922616	416.579267095646	299.93023255814	145.585913679634	3600.53488372093	681.970342818229	45.7861111111111	45.8715277777778	2623.42324561111	6.06796442081705	6.60844848613116	2623.42324561111	18	14.3333333333333	4.90489255891429
996743	Control	24+24	TRITC	1212.73871194826	281.441348726985	459.936046511628	108.615484031574	2878.25	722.49235715013	45.7861111111111	45.8715277777778	2623.42324561111	6.06796442081705	6.60844848613116	2623.42324561111	18	14.3333333333333	4.90489255891429
996744	Control	24+24	FITC	1212.63402922616	416.579267095646	299.93023255814	145.585913679634	3600.53488372093	681.970342818229	35.9907819690909	33.8676738627273	1632.27180029091	11.3011964540232	9.01639761239303	1632.27180029091	11	14.3333333333333	4.90489255891429
996744	Control	24+24	TRITC	1212.73871194826	281.441348726985	459.936046511628	108.615484031574	2878.25	722.49235715013	35.9907819690909	33.8676738627273	1632.27180029091	11.3011964540232	9.01639761239303	1632.27180029091	11	14.3333333333333	4.90489255891429
996745	Control	24+24	FITC	1212.63402922616	416.579267095646	299.93023255814	145.585913679634	3600.53488372093	681.970342818229	44.587979353125	43.02527669875	2591.03300356875	13.5073810690605	12.9933199746703	2591.03300356875	16	14.3333333333333	4.90489255891429
996745	Control	24+24	TRITC	1212.73871194826	281.441348726985	459.936046511628	108.615484031574	2878.25	722.49235715013	44.587979353125	43.02527669875	2591.03300356875	13.5073810690605	12.9933199746703	2591.03300356875	16	14.3333333333333	4.90489255891429
996789	Control	24+24	FITC	1212.63402922616	416.579267095646	299.93023255814	145.585913679634	3600.53488372093	681.970342818229	46.0433637838462	48.45991715	2861.929047	9.80891609729365	9.59866529496828	2861.929047	13	14.3333333333333	4.90489255891429
996789	Control	24+24	TRITC	1212.73871194826	281.441348726985	459.936046511628	108.615484031574	2878.25	722.49235715013	46.0433637838462	48.45991715	2861.929047	9.80891609729365	9.59866529496828	2861.929047	13	14.3333333333333	4.90489255891429
996790	Control	24+24	FITC	1212.63402922616	416.579267095646	299.93023255814	145.585913679634	3600.53488372093	681.970342818229	57.7726273311111	55.4226222444444	3998.73648744444	7.1656798305717	6.23453200819021	3998.73648744444	9	14.3333333333333	4.90489255891429
996790	Control	24+24	TRITC	1212.73871194826	281.441348726985	459.936046511628	108.615484031574	2878.25	722.49235715013	57.7726273311111	55.4226222444444	3998.73648744444	7.1656798305717	6.23453200819021	3998.73648744444	9	14.3333333333333	4.90489255891429
996791	Control	24+24	FITC	1212.63402922616	416.579267095646	299.93023255814	145.585913679634	3600.53488372093	681.970342818229	57.75596996625	52.09857739375	3826.201798875	13.0147291818439	6.78597330288184	3826.201798875	8	14.3333333333333	4.90489255891429
996791	Control	24+24	TRITC	1212.73871194826	281.441348726985	459.936046511628	108.615484031574	2878.25	722.49235715013	57.75596996625	52.09857739375	3826.201798875	13.0147291818439	6.78597330288184	3826.201798875	8	14.3333333333333	4.90489255891429
996792	Control	24+24	FITC	1212.63402922616	416.579267095646	299.93023255814	145.585913679634	3600.53488372093	681.970342818229	57.28746086	53.2604882827273	3991.33929036364	18.6493750565575	12.1719167906051	3991.33929036364	11	14.3333333333333	4.90489255891429
996792	Control	24+24	TRITC	1212.73871194826	281.441348726985	459.936046511628	108.615484031574	2878.25	722.49235715013	57.28746086	53.2604882827273	3991.33929036364	18.6493750565575	12.1719167906051	3991.33929036364	11	14.3333333333333	4.90489255891429
996793	Control	24+24	FITC	1212.63402922616	416.579267095646	299.93023255814	145.585913679634	3600.53488372093	681.970342818229	49.575491	44.6691964854545	2775.45973881818	6.95105353541602	6.65001780404199	2775.45973881818	11	14.3333333333333	4.90489255891429
996793	Control	24+24	TRITC	1212.73871194826	281.441348726985	459.936046511628	108.615484031574	2878.25	722.49235715013	49.575491	44.6691964854545	2775.45973881818	6.95105353541602	6.65001780404199	2775.45973881818	11	14.3333333333333	4.90489255891429
996794	Control	24+24	FITC	1212.63402922616	416.579267095646	299.93023255814	145.585913679634	3600.53488372093	681.970342818229	48.982435775	52.2181753	3280.13216216667	8.04246563135652	13.139552055498	3280.13216216667	12	14.3333333333333	4.90489255891429
996794	Control	24+24	TRITC	1212.73871194826	281.441348726985	459.936046511628	108.615484031574	2878.25	722.49235715013	48.982435775	52.2181753	3280.13216216667	8.04246563135652	13.139552055498	3280.13216216667	12	14.3333333333333	4.90489255891429
996763	PD-100, C59-1	24+24	FITC	707.594091564868	182.320028073547	144.678571428571	54.4875477255387	3337.75	737.790576779878	41.6756589771966	43.2819012097815	2249.37482032014	2.43620297977037	3.7392977481411	2249.37482032014	5	5.6	1.83787316694536
996763	PD-100, C59-1	24+24	TRITC	876.547296853401	181.274682473255	275.535714285714	57.9670929272278	2418.21428571429	567.821721966066	41.6756589771966	43.2819012097815	2249.37482032014	2.43620297977037	3.7392977481411	2249.37482032014	5	5.6	1.83787316694536
996764	PD-100, C59-1	24+24	FITC	707.594091564868	182.320028073547	144.678571428571	54.4875477255387	3337.75	737.790576779878	39.2732710738658	39.0144850789292	1922.2109388302	4.4761954310992	5.60215370409607	1922.2109388302	8	5.6	1.83787316694536
996764	PD-100, C59-1	24+24	TRITC	876.547296853401	181.274682473255	275.535714285714	57.9670929272278	2418.21428571429	567.821721966066	39.2732710738658	39.0144850789292	1922.2109388302	4.4761954310992	5.60215370409607	1922.2109388302	8	5.6	1.83787316694536
996765	PD-100, C59-1	24+24	FITC	707.594091564868	182.320028073547	144.678571428571	54.4875477255387	3337.75	737.790576779878	36.7740383599911	37.1343551053632	1739.12544532046	6.2071663303076	9.17186720278299	1739.12544532046	7	5.6	1.83787316694536
996765	PD-100, C59-1	24+24	TRITC	876.547296853401	181.274682473255	275.535714285714	57.9670929272278	2418.21428571429	567.821721966066	36.7740383599911	37.1343551053632	1739.12544532046	6.2071663303076	9.17186720278299	1739.12544532046	7	5.6	1.83787316694536
996766	PD-100, C59-1	24+24	FITC	707.594091564868	182.320028073547	144.678571428571	54.4875477255387	3337.75	737.790576779878	44.7976422468903	42.0987841552802	2351.8370465524	8.46580585593847	2.58032711766745	2351.8370465524	3	5.6	1.83787316694536
996766	PD-100, C59-1	24+24	TRITC	876.547296853401	181.274682473255	275.535714285714	57.9670929272278	2418.21428571429	567.821721966066	44.7976422468903	42.0987841552802	2351.8370465524	8.46580585593847	2.58032711766745	2351.8370465524	3	5.6	1.83787316694536
996767	PD-100, C59-1	24+24	FITC	707.594091564868	182.320028073547	144.678571428571	54.4875477255387	3337.75	737.790576779878	42.4659016511582	39.0022655662525	2084.19491312655	7.035359976073	3.67651072725456	2084.19491312655	5	5.6	1.83787316694536
996767	PD-100, C59-1	24+24	TRITC	876.547296853401	181.274682473255	275.535714285714	57.9670929272278	2418.21428571429	567.821721966066	42.4659016511582	39.0022655662525	2084.19491312655	7.035359976073	3.67651072725456	2084.19491312655	5	5.6	1.83787316694536
996768	PD-100, C59-2	24+24	FITC	661.890511113378	232.458428941815	138.586206896552	67.2264389111156	2948.31034482759	822.908565631178	40.3099936886914	40.8271439537046	2059.10311537456	4.76451906167368	4.82521064048338	2059.10311537456	5	5.8	1.22927259430572
996768	PD-100, C59-2	24+24	TRITC	906.30706828348	253.778351478783	284	57.8087981440294	2405.03448275862	791.858504800962	40.3099936886914	40.8271439537046	2059.10311537456	4.76451906167368	4.82521064048338	2059.10311537456	5	5.8	1.22927259430572
996769	PD-100, C59-2	24+24	FITC	661.890511113378	232.458428941815	138.586206896552	67.2264389111156	2948.31034482759	822.908565631178	37.0694484514606	36.480860114357	1691.82360547382	2.8659699122925	5.20809851571196	1691.82360547382	4	5.8	1.22927259430572
996769	PD-100, C59-2	24+24	TRITC	906.30706828348	253.778351478783	284	57.8087981440294	2405.03448275862	791.858504800962	37.0694484514606	36.480860114357	1691.82360547382	2.8659699122925	5.20809851571196	1691.82360547382	4	5.8	1.22927259430572
996770	PD-100, C59-2	24+24	FITC	661.890511113378	232.458428941815	138.586206896552	67.2264389111156	2948.31034482759	822.908565631178	37.8486139328733	33.8662298936439	1676.7175847533	11.834544063679	6.77640823818567	1676.7175847533	7	5.8	1.22927259430572
996770	PD-100, C59-2	24+24	TRITC	906.30706828348	253.778351478783	284	57.8087981440294	2405.03448275862	791.858504800962	37.8486139328733	33.8662298936439	1676.7175847533	11.834544063679	6.77640823818567	1676.7175847533	7	5.8	1.22927259430572
996771	PD-100, C59-2	24+24	FITC	661.890511113378	232.458428941815	138.586206896552	67.2264389111156	2948.31034482759	822.908565631178	38.8538146547728	31.155552037781	1533.25584457574	7.35268639189495	5.40597077380188	1533.25584457574	6	5.8	1.22927259430572
996771	PD-100, C59-2	24+24	TRITC	906.30706828348	253.778351478783	284	57.8087981440294	2405.03448275862	791.858504800962	38.8538146547728	31.155552037781	1533.25584457574	7.35268639189495	5.40597077380188	1533.25584457574	6	5.8	1.22927259430572
996772	PD-100, C59-2	24+24	FITC	661.890511113378	232.458428941815	138.586206896552	67.2264389111156	2948.31034482759	822.908565631178	42.8736687921743	40.2673842577598	2186.61626146227	7.62367318382201	5.88852233910838	2186.61626146227	7	5.8	1.22927259430572
996772	PD-100, C59-2	24+24	TRITC	906.30706828348	253.778351478783	284	57.8087981440294	2405.03448275862	791.858504800962	42.8736687921743	40.2673842577598	2186.61626146227	7.62367318382201	5.88852233910838	2186.61626146227	7	5.8	1.22927259430572
996807	PD-100, XAV-1, A83, LDN	24+24	FITC	628.986153154469	246.279269650779	120.555555555556	81.076582231739	2851.92063492063	806.537307930304	33.302172741138	31.2723182784275	1329.73431786763	4.82024522876184	7.280973732044	1329.73431786763	7	7.875	1.08781125813871
996807	PD-100, XAV-1, A83, LDN	24+24	TRITC	789.141015579924	253.232532217812	234.444444444444	59.9746660972506	2228.61904761905	784.498245820762	33.302172741138	31.2723182784275	1329.73431786763	4.82024522876184	7.280973732044	1329.73431786763	7	7.875	1.08781125813871
996808	PD-100, XAV-1, A83, LDN	24+24	FITC	628.986153154469	246.279269650779	120.555555555556	81.076582231739	2851.92063492063	806.537307930304	35.0650175916493	33.30401230672	1493.19594437889	6.08062409519153	7.48378267542911	1493.19594437889	9	7.875	1.08781125813871
996808	PD-100, XAV-1, A83, LDN	24+24	TRITC	789.141015579924	253.232532217812	234.444444444444	59.9746660972506	2228.61904761905	784.498245820762	35.0650175916493	33.30401230672	1493.19594437889	6.08062409519153	7.48378267542911	1493.19594437889	9	7.875	1.08781125813871
996809	PD-100, XAV-1, A83, LDN	24+24	FITC	628.986153154469	246.279269650779	120.555555555556	81.076582231739	2851.92063492063	806.537307930304	36.3439745445062	34.3219795092064	1611.05721413064	7.55599996920651	7.51066352217226	1611.05721413064	9	7.875	1.08781125813871
996809	PD-100, XAV-1, A83, LDN	24+24	TRITC	789.141015579924	253.232532217812	234.444444444444	59.9746660972506	2228.61904761905	784.498245820762	36.3439745445062	34.3219795092064	1611.05721413064	7.55599996920651	7.51066352217226	1611.05721413064	9	7.875	1.08781125813871
996810	PD-100, XAV-1, A83, LDN	24+24	FITC	628.986153154469	246.279269650779	120.555555555556	81.076582231739	2851.92063492063	806.537307930304	35.4686530628675	36.5210416564301	1641.17105996179	5.55056502345163	5.39168527200789	1641.17105996179	8	7.875	1.08781125813871
996810	PD-100, XAV-1, A83, LDN	24+24	TRITC	789.141015579924	253.232532217812	234.444444444444	59.9746660972506	2228.61904761905	784.498245820762	35.4686530628675	36.5210416564301	1641.17105996179	5.55056502345163	5.39168527200789	1641.17105996179	8	7.875	1.08781125813871
996811	PD-100, XAV-1, A83, LDN	24+24	FITC	628.986153154469	246.279269650779	120.555555555556	81.076582231739	2851.92063492063	806.537307930304	32.6182256955055	32.8637856087535	1364.78398408835	3.65001707606817	9.83111801009673	1364.78398408835	6	7.875	1.08781125813871
996811	PD-100, XAV-1, A83, LDN	24+24	TRITC	789.141015579924	253.232532217812	234.444444444444	59.9746660972506	2228.61904761905	784.498245820762	32.6182256955055	32.8637856087535	1364.78398408835	3.65001707606817	9.83111801009673	1364.78398408835	6	7.875	1.08781125813871
996812	PD-100, XAV-1, A83, LDN	24+24	FITC	628.986153154469	246.279269650779	120.555555555556	81.076582231739	2851.92063492063	806.537307930304	33.6360800960362	29.5780406463265	1229.33834843874	6.19432548328844	4.04177989170289	1229.33834843874	8	7.875	1.08781125813871
996812	PD-100, XAV-1, A83, LDN	24+24	TRITC	789.141015579924	253.232532217812	234.444444444444	59.9746660972506	2228.61904761905	784.498245820762	33.6360800960362	29.5780406463265	1229.33834843874	6.19432548328844	4.04177989170289	1229.33834843874	8	7.875	1.08781125813871
996813	PD-100, XAV-1, A83, LDN	24+24	FITC	628.986153154469	246.279269650779	120.555555555556	81.076582231739	2851.92063492063	806.537307930304	43.4536798848329	37.1359347655726	2050.94108881437	6.7577583689408	6.43296947319233	2050.94108881437	7	7.875	1.08781125813871
996813	PD-100, XAV-1, A83, LDN	24+24	TRITC	789.141015579924	253.232532217812	234.444444444444	59.9746660972506	2228.61904761905	784.498245820762	43.4536798848329	37.1359347655726	2050.94108881437	6.7577583689408	6.43296947319233	2050.94108881437	7	7.875	1.08781125813871
996814	PD-100, XAV-1, A83, LDN	24+24	FITC	628.986153154469	246.279269650779	120.555555555556	81.076582231739	2851.92063492063	806.537307930304	45.9659762698609	36.4193364194673	2255.00563416531	16.7278749655355	10.218713105463	2255.00563416531	9	7.875	1.08781125813871
996814	PD-100, XAV-1, A83, LDN	24+24	TRITC	789.141015579924	253.232532217812	234.444444444444	59.9746660972506	2228.61904761905	784.498245820762	45.9659762698609	36.4193364194673	2255.00563416531	16.7278749655355	10.218713105463	2255.00563416531	9	7.875	1.08781125813871
996799	PD-100, XAV-1, A83	24+24	FITC	613.752436752308	242.048133057413	101.294117647059	64.9734348566908	2912.35294117647	869.895984111265	35.1338745186665	33.9962007499583	1498.41969476429	6.08293902626632	6.4170739409873	1498.41969476429	7	8.5	1.19522860933439
996799	PD-100, XAV-1, A83	24+24	TRITC	916.42443240596	377.592930398151	273.441176470588	63.8811354410724	2402.88235294118	769.734695132853	35.1338745186665	33.9962007499583	1498.41969476429	6.08293902626632	6.4170739409873	1498.41969476429	7	8.5	1.19522860933439
996800	PD-100, XAV-1, A83	24+24	FITC	613.752436752308	242.048133057413	101.294117647059	64.9734348566908	2912.35294117647	869.895984111265	42.7931019000729	39.974111380466	2254.61289087136	13.2149919455315	10.7895393650919	2254.61289087136	10	8.5	1.19522860933439
996800	PD-100, XAV-1, A83	24+24	TRITC	916.42443240596	377.592930398151	273.441176470588	63.8811354410724	2402.88235294118	769.734695132853	42.7931019000729	39.974111380466	2254.61289087136	13.2149919455315	10.7895393650919	2254.61289087136	10	8.5	1.19522860933439
996801	PD-100, XAV-1, A83	24+24	FITC	613.752436752308	242.048133057413	101.294117647059	64.9734348566908	2912.35294117647	869.895984111265	38.2297960944935	36.6364044647216	1880.14030796712	13.2501022202244	9.43095940337505	1880.14030796712	9	8.5	1.19522860933439
996801	PD-100, XAV-1, A83	24+24	TRITC	916.42443240596	377.592930398151	273.441176470588	63.8811354410724	2402.88235294118	769.734695132853	38.2297960944935	36.6364044647216	1880.14030796712	13.2501022202244	9.43095940337505	1880.14030796712	9	8.5	1.19522860933439
996802	PD-100, XAV-1, A83	24+24	FITC	613.752436752308	242.048133057413	101.294117647059	64.9734348566908	2912.35294117647	869.895984111265	43.9029227475385	37.4201539484421	2054.93239125586	10.5953508756791	5.29044700951272	2054.93239125586	8	8.5	1.19522860933439
996802	PD-100, XAV-1, A83	24+24	TRITC	916.42443240596	377.592930398151	273.441176470588	63.8811354410724	2402.88235294118	769.734695132853	43.9029227475385	37.4201539484421	2054.93239125586	10.5953508756791	5.29044700951272	2054.93239125586	8	8.5	1.19522860933439
996823	PD-100, XAV-2, A83, LDN	24+24	FITC	606.290770645652	294.949284499195	100.304347826087	76.944964333164	2704.84782608696	1059.97322748981	33.87591729	33.1058432983333	1410.33582985	7.40367464965996	5.58526966768721	1410.33582985	12	9.2	2.04396129556745
996823	PD-100, XAV-2, A83, LDN	24+24	TRITC	818.210575147826	332.114072149662	238.521739130435	82.6023241885642	2218.17391304348	884.260200628446	33.87591729	33.1058432983333	1410.33582985	7.40367464965996	5.58526966768721	1410.33582985	12	9.2	2.04396129556745
996824	PD-100, XAV-2, A83, LDN	24+24	FITC	606.290770645652	294.949284499195	100.304347826087	76.944964333164	2704.84782608696	1059.97322748981	37.418933065	40.61026348	1909.254100125	7.50553727125219	6.22031286010996	1909.254100125	8	9.2	2.04396129556745
996824	PD-100, XAV-2, A83, LDN	24+24	TRITC	818.210575147826	332.114072149662	238.521739130435	82.6023241885642	2218.17391304348	884.260200628446	37.418933065	40.61026348	1909.254100125	7.50553727125219	6.22031286010996	1909.254100125	8	9.2	2.04396129556745
996825	PD-100, XAV-2, A83, LDN	24+24	FITC	606.290770645652	294.949284499195	100.304347826087	76.944964333164	2704.84782608696	1059.97322748981	41.58666377875	39.89479586125	2128.951858875	8.70110719054681	7.02257335076948	2128.951858875	8	9.2	2.04396129556745
996825	PD-100, XAV-2, A83, LDN	24+24	TRITC	818.210575147826	332.114072149662	238.521739130435	82.6023241885642	2218.17391304348	884.260200628446	41.58666377875	39.89479586125	2128.951858875	8.70110719054681	7.02257335076948	2128.951858875	8	9.2	2.04396129556745
996826	PD-100, XAV-2, A83, LDN	24+24	FITC	606.290770645652	294.949284499195	100.304347826087	76.944964333164	2704.84782608696	1059.97322748981	40.1750740671429	40.6163016414286	2150.60997585714	12.3730963876236	8.79595145079568	2150.60997585714	7	9.2	2.04396129556745
996826	PD-100, XAV-2, A83, LDN	24+24	TRITC	818.210575147826	332.114072149662	238.521739130435	82.6023241885642	2218.17391304348	884.260200628446	40.1750740671429	40.6163016414286	2150.60997585714	12.3730963876236	8.79595145079568	2150.60997585714	7	9.2	2.04396129556745
996827	PD-100, XAV-2, A83, LDN	24+24	FITC	606.290770645652	294.949284499195	100.304347826087	76.944964333164	2704.84782608696	1059.97322748981	42.3207795390909	41.9036190472727	2290.25782354545	8.90654942816808	9.97080233718625	2290.25782354545	11	9.2	2.04396129556745
996827	PD-100, XAV-2, A83, LDN	24+24	TRITC	818.210575147826	332.114072149662	238.521739130435	82.6023241885642	2218.17391304348	884.260200628446	42.3207795390909	41.9036190472727	2290.25782354545	8.90654942816808	9.97080233718625	2290.25782354545	11	9.2	2.04396129556745
996831	PD-100, XAV-2, A83	24+24	FITC	551.303976495189	264.412560950242	93.2	83.4079475486942	2373.13333333333	1027.23414125134	35.3354910248831	35.8914823472323	1582.56428590853	4.75996934872463	4.89446560315079	1582.56428590853	15	15	0
996831	PD-100, XAV-2, A83	24+24	TRITC	764.961567053836	231.904447042626	246.066666666667	78.4997421894462	2100	689.400360561885	35.3354910248831	35.8914823472323	1582.56428590853	4.75996934872463	4.89446560315079	1582.56428590853	15	15	0
996795	PD-250, C59-1	24+24	FITC	683.44258821683	253.161546279787	144.96	80.4691866493007	2711.44	891.105543692777	37.7131077222133	37.0369807503156	1751.03113403209	7.89069320004811	3.77932048838808	1751.03113403209	7	6.25	2.0528725518857
996795	PD-250, C59-1	24+24	TRITC	833.785023514934	309.792854303016	224.04	69.3244064766034	2231.92	801.910942686281	37.7131077222133	37.0369807503156	1751.03113403209	7.89069320004811	3.77932048838808	1751.03113403209	7	6.25	2.0528725518857
996796	PD-250, C59-1	24+24	FITC	683.44258821683	253.161546279787	144.96	80.4691866493007	2711.44	891.105543692777	36.9859282622795	35.7783715498516	1659.85389834612	4.80102293462595	6.77604740741437	1659.85389834612	9	6.25	2.0528725518857
996796	PD-250, C59-1	24+24	TRITC	833.785023514934	309.792854303016	224.04	69.3244064766034	2231.92	801.910942686281	36.9859282622795	35.7783715498516	1659.85389834612	4.80102293462595	6.77604740741437	1659.85389834612	9	6.25	2.0528725518857
996797	PD-250, C59-1	24+24	FITC	683.44258821683	253.161546279787	144.96	80.4691866493007	2711.44	891.105543692777	34.8728609560169	31.4209697907696	1317.24868686029	8.7042138617636	6.74715415738372	1317.24868686029	5	6.25	2.0528725518857
996797	PD-250, C59-1	24+24	TRITC	833.785023514934	309.792854303016	224.04	69.3244064766034	2231.92	801.910942686281	34.8728609560169	31.4209697907696	1317.24868686029	8.7042138617636	6.74715415738372	1317.24868686029	5	6.25	2.0528725518857
996798	PD-250, C59-1	24+24	FITC	683.44258821683	253.161546279787	144.96	80.4691866493007	2711.44	891.105543692777	37.9723001312325	32.9366128341618	1549.11639762135	1.81108170395014	4.75480017075284	1549.11639762135	4	6.25	2.0528725518857
996798	PD-250, C59-1	24+24	TRITC	833.785023514934	309.792854303016	224.04	69.3244064766034	2231.92	801.910942686281	37.9723001312325	32.9366128341618	1549.11639762135	1.81108170395014	4.75480017075284	1549.11639762135	4	6.25	2.0528725518857
996832	PD-250, C59-2	24+24	FITC	534.74632019855	201.77362551749	105.243902439024	67.6046523871711	2056.70731707317	825.155235210395	37.5965828396847	38.1061860592022	1824.43528174852	7.7609663773069	7.280302123498	1824.43528174852	10	10.25	1.90862703084106
996832	PD-250, C59-2	24+24	TRITC	683.350022413195	175.148696981651	207.048780487805	45.5894457191093	1822.21951219512	572.016412010841	37.5965828396847	38.1061860592022	1824.43528174852	7.7609663773069	7.280302123498	1824.43528174852	10	10.25	1.90862703084106
996833	PD-250, C59-2	24+24	FITC	534.74632019855	201.77362551749	105.243902439024	67.6046523871711	2056.70731707317	825.155235210395	31.9874459863938	33.1813456144948	1338.72036427498	4.31303651896619	4.36202923273363	1338.72036427498	8	10.25	1.90862703084106
996833	PD-250, C59-2	24+24	TRITC	683.350022413195	175.148696981651	207.048780487805	45.5894457191093	1822.21951219512	572.016412010841	31.9874459863938	33.1813456144948	1338.72036427498	4.31303651896619	4.36202923273363	1338.72036427498	8	10.25	1.90862703084106
996834	PD-250, C59-2	24+24	FITC	534.74632019855	201.77362551749	105.243902439024	67.6046523871711	2056.70731707317	825.155235210395	42.3779105764314	38.3758591288621	2101.78115486671	13.1303688338186	7.00146226562749	2101.78115486671	10	10.25	1.90862703084106
996834	PD-250, C59-2	24+24	TRITC	683.350022413195	175.148696981651	207.048780487805	45.5894457191093	1822.21951219512	572.016412010841	42.3779105764314	38.3758591288621	2101.78115486671	13.1303688338186	7.00146226562749	2101.78115486671	10	10.25	1.90862703084106
996835	PD-250, C59-2	24+24	FITC	534.74632019855	201.77362551749	105.243902439024	67.6046523871711	2056.70731707317	825.155235210395	35.2339942916509	35.2796553351013	1578.32910179274	5.8693395453948	6.13163543850918	1578.32910179274	13	10.25	1.90862703084106
996835	PD-250, C59-2	24+24	TRITC	683.350022413195	175.148696981651	207.048780487805	45.5894457191093	1822.21951219512	572.016412010841	35.2339942916509	35.2796553351013	1578.32910179274	5.8693395453948	6.13163543850918	1578.32910179274	13	10.25	1.90862703084106
996815	PD-250, XAV-1, A83, LDN	24+24	FITC	603.172810812512	244.543058337624	108.658536585366	56.3336532439081	2860.31707317073	923.822911575167	48.0663015974491	36.8193321227689	2243.24233949606	12.1645195704393	5.99046773567255	2243.24233949606	10	8.2	1.54919333848297
996815	PD-250, XAV-1, A83, LDN	24+24	TRITC	793.21098873267	282.584369168317	235.268292682927	64.5604462462288	2205.21951219512	874.177771171148	48.0663015974491	36.8193321227689	2243.24233949606	12.1645195704393	5.99046773567255	2243.24233949606	10	8.2	1.54919333848297
996816	PD-250, XAV-1, A83, LDN	24+24	FITC	603.172810812512	244.543058337624	108.658536585366	56.3336532439081	2860.31707317073	923.822911575167	37.1428449649314	34.0714224937731	1573.65072058291	4.04508264221266	7.63307200102873	1573.65072058291	7	8.2	1.54919333848297
996816	PD-250, XAV-1, A83, LDN	24+24	TRITC	793.21098873267	282.584369168317	235.268292682927	64.5604462462288	2205.21951219512	874.177771171148	37.1428449649314	34.0714224937731	1573.65072058291	4.04508264221266	7.63307200102873	1573.65072058291	7	8.2	1.54919333848297
996817	PD-250, XAV-1, A83, LDN	24+24	FITC	603.172810812512	244.543058337624	108.658536585366	56.3336532439081	2860.31707317073	923.822911575167	36.6335232740214	37.6992299085134	1753.12026798974	7.86519513558552	6.33200354397541	1753.12026798974	7	8.2	1.54919333848297
996817	PD-250, XAV-1, A83, LDN	24+24	TRITC	793.21098873267	282.584369168317	235.268292682927	64.5604462462288	2205.21951219512	874.177771171148	36.6335232740214	37.6992299085134	1753.12026798974	7.86519513558552	6.33200354397541	1753.12026798974	7	8.2	1.54919333848297
996818	PD-250, XAV-1, A83, LDN	24+24	FITC	603.172810812512	244.543058337624	108.658536585366	56.3336532439081	2860.31707317073	923.822911575167	42.3905346250469	36.2802526250904	1915.28241149742	4.60013968554588	4.83318480677247	1915.28241149742	10	8.2	1.54919333848297
996818	PD-250, XAV-1, A83, LDN	24+24	TRITC	793.21098873267	282.584369168317	235.268292682927	64.5604462462288	2205.21951219512	874.177771171148	42.3905346250469	36.2802526250904	1915.28241149742	4.60013968554588	4.83318480677247	1915.28241149742	10	8.2	1.54919333848297
996819	PD-250, XAV-1, A83, LDN	24+24	FITC	603.172810812512	244.543058337624	108.658536585366	56.3336532439081	2860.31707317073	923.822911575167	41.5544509325768	41.6832234783639	2217.73163567873	8.53719288234172	9.51901532516538	2217.73163567873	7	8.2	1.54919333848297
996819	PD-250, XAV-1, A83, LDN	24+24	TRITC	793.21098873267	282.584369168317	235.268292682927	64.5604462462288	2205.21951219512	874.177771171148	41.5544509325768	41.6832234783639	2217.73163567873	8.53719288234172	9.51901532516538	2217.73163567873	7	8.2	1.54919333848297
996803	PD-250, XAV-1, A83	24+24	FITC	650.448827108103	254.721485878923	125.115384615385	75.0649462388814	2995.03846153846	1005.0449733527	39.3842208344776	35.2366201816146	1742.69875954886	6.47109627242461	5.12462147440931	1742.69875954886	7	6.5	0.534522483824849
996803	PD-250, XAV-1, A83	24+24	TRITC	899.128224904366	309.141944080796	266.653846153846	80.4357842295044	2345.38461538462	840.351644345298	39.3842208344776	35.2366201816146	1742.69875954886	6.47109627242461	5.12462147440931	1742.69875954886	7	6.5	0.534522483824849
996804	PD-250, XAV-1, A83	24+24	FITC	650.448827108103	254.721485878923	125.115384615385	75.0649462388814	2995.03846153846	1005.0449733527	34.5436911071028	31.8697209747204	1421.44670115749	6.87968466808843	7.25268048598546	1421.44670115749	6	6.5	0.534522483824849
996804	PD-250, XAV-1, A83	24+24	TRITC	899.128224904366	309.141944080796	266.653846153846	80.4357842295044	2345.38461538462	840.351644345298	34.5436911071028	31.8697209747204	1421.44670115749	6.87968466808843	7.25268048598546	1421.44670115749	6	6.5	0.534522483824849
996805	PD-250, XAV-1, A83	24+24	FITC	650.448827108103	254.721485878923	125.115384615385	75.0649462388814	2995.03846153846	1005.0449733527	47.8791682369112	46.680392730428	2881.49898586816	10.7965495846423	10.3518882911033	2881.49898586816	6	6.5	0.534522483824849
996805	PD-250, XAV-1, A83	24+24	TRITC	899.128224904366	309.141944080796	266.653846153846	80.4357842295044	2345.38461538462	840.351644345298	47.8791682369112	46.680392730428	2881.49898586816	10.7965495846423	10.3518882911033	2881.49898586816	6	6.5	0.534522483824849
996806	PD-250, XAV-1, A83	24+24	FITC	650.448827108103	254.721485878923	125.115384615385	75.0649462388814	2995.03846153846	1005.0449733527	47.6593469851623	39.8701493597834	2382.80745440175	11.3948363768302	5.47759740385833	2382.80745440175	7	6.5	0.534522483824849
996806	PD-250, XAV-1, A83	24+24	TRITC	899.128224904366	309.141944080796	266.653846153846	80.4357842295044	2345.38461538462	840.351644345298	47.6593469851623	39.8701493597834	2382.80745440175	11.3948363768302	5.47759740385833	2382.80745440175	7	6.5	0.534522483824849
996820	PD-250, XAV-2, A83, LDN	24+24	FITC	572.286751101101	219.867648209029	102.521739130435	60.2312736384569	2524.17391304348	1070.95576057404	42.7997671178478	37.5743847879025	2043.51655774828	7.490339422955	7.38660006703648	2043.51655774828	7	7.66666666666667	0.516397779494322
996820	PD-250, XAV-2, A83, LDN	24+24	TRITC	754.488476355898	217.562996090952	224.434782608696	59.0345246344394	2030.30434782609	655.766549008425	42.7997671178478	37.5743847879025	2043.51655774828	7.490339422955	7.38660006703648	2043.51655774828	7	7.66666666666667	0.516397779494322
996821	PD-250, XAV-2, A83, LDN	24+24	FITC	572.286751101101	219.867648209029	102.521739130435	60.2312736384569	2524.17391304348	1070.95576057404	38.353480475224	37.5378190571435	1825.84268171401	4.90044980267464	7.48078213732412	1825.84268171401	8	7.66666666666667	0.516397779494322
996821	PD-250, XAV-2, A83, LDN	24+24	TRITC	754.488476355898	217.562996090952	224.434782608696	59.0345246344394	2030.30434782609	655.766549008425	38.353480475224	37.5378190571435	1825.84268171401	4.90044980267464	7.48078213732412	1825.84268171401	8	7.66666666666667	0.516397779494322
996822	PD-250, XAV-2, A83, LDN	24+24	FITC	572.286751101101	219.867648209029	102.521739130435	60.2312736384569	2524.17391304348	1070.95576057404	34.7493897467308	34.1522285827673	1477.45080340438	6.12101175971119	5.72142326315964	1477.45080340438	8	7.66666666666667	0.516397779494322
996822	PD-250, XAV-2, A83, LDN	24+24	TRITC	754.488476355898	217.562996090952	224.434782608696	59.0345246344394	2030.30434782609	655.766549008425	34.7493897467308	34.1522285827673	1477.45080340438	6.12101175971119	5.72142326315964	1477.45080340438	8	7.66666666666667	0.516397779494322
996828	PD-250, XAV-2, A83	24+24	FITC	579.65266831211	210.556449625648	111.866666666667	51.9288195403147	2397.53333333333	769.226782995861	34.8773147017686	33.744329517016	1457.48339911566	3.71324735124287	3.7180287158699	1457.48339911566	10	10	1.78885438199983
996828	PD-250, XAV-2, A83	24+24	TRITC	776.198511298057	192.994175223208	249.033333333333	48.9246312222165	2025	657.089927189417	34.8773147017686	33.744329517016	1457.48339911566	3.71324735124287	3.7180287158699	1457.48339911566	10	10	1.78885438199983
996829	PD-250, XAV-2, A83	24+24	FITC	579.65266831211	210.556449625648	111.866666666667	51.9288195403147	2397.53333333333	769.226782995861	35.1892498330397	40.0822043612715	1772.01539550568	5.65344576669338	8.16683249584996	1772.01539550568	12	10	1.78885438199983
996829	PD-250, XAV-2, A83	24+24	TRITC	776.198511298057	192.994175223208	249.033333333333	48.9246312222165	2025	657.089927189417	35.1892498330397	40.0822043612715	1772.01539550568	5.65344576669338	8.16683249584996	1772.01539550568	12	10	1.78885438199983
996830	PD-250, XAV-2, A83	24+24	FITC	579.65266831211	210.556449625648	111.866666666667	51.9288195403147	2397.53333333333	769.226782995861	34.2877311561443	34.5734841010099	1528.05272011693	6.74475231352461	7.51477911572322	1528.05272011693	8	10	1.78885438199983
996830	PD-250, XAV-2, A83	24+24	TRITC	776.198511298057	192.994175223208	249.033333333333	48.9246312222165	2025	657.089927189417	34.2877311561443	34.5734841010099	1528.05272011693	6.74475231352461	7.51477911572322	1528.05272011693	8	10	1.78885438199983
996784	PD-250	24+24	FITC	653.881755481112	287.596490981458	118.185185185185	65.4011509173236	3030.25925925926	962.368176490945	38.0553372387267	41.9297411232144	1995.02382791198	6.33582985949088	5.07506814572371	1995.02382791198	6	5.4	2.71620650499512
996784	PD-250	24+24	TRITC	981.85953804902	354.538019258492	253.037037037037	49.7072053912335	2754.88888888889	784.267631582942	38.0553372387267	41.9297411232144	1995.02382791198	6.33582985949088	5.07506814572371	1995.02382791198	6	5.4	2.71620650499512
996785	PD-250	24+24	FITC	653.881755481112	287.596490981458	118.185185185185	65.4011509173236	3030.25925925926	962.368176490945	38.3841206683439	37.4479437894551	1840.32938729585	9.43754828274541	6.17174388349159	1840.32938729585	5	5.4	2.71620650499512
996785	PD-250	24+24	TRITC	981.85953804902	354.538019258492	253.037037037037	49.7072053912335	2754.88888888889	784.267631582942	38.3841206683439	37.4479437894551	1840.32938729585	9.43754828274541	6.17174388349159	1840.32938729585	5	5.4	2.71620650499512
996786	PD-250	24+24	FITC	653.881755481112	287.596490981458	118.185185185185	65.4011509173236	3030.25925925926	962.368176490945	40.0111704734733	40.715768617627	2113.28903028063	8.65961137978385	11.370358196106	2113.28903028063	10	5.4	2.71620650499512
996786	PD-250	24+24	TRITC	981.85953804902	354.538019258492	253.037037037037	49.7072053912335	2754.88888888889	784.267631582942	40.0111704734733	40.715768617627	2113.28903028063	8.65961137978385	11.370358196106	2113.28903028063	10	5.4	2.71620650499512
996787	PD-250	24+24	FITC	653.881755481112	287.596490981458	118.185185185185	65.4011509173236	3030.25925925926	962.368176490945	44.4060449876754	47.798155697172	2641.19551142373	6.20594693116357	4.225978961598	2641.19551142373	3	5.4	2.71620650499512
996787	PD-250	24+24	TRITC	981.85953804902	354.538019258492	253.037037037037	49.7072053912335	2754.88888888889	784.267631582942	44.4060449876754	47.798155697172	2641.19551142373	6.20594693116357	4.225978961598	2641.19551142373	3	5.4	2.71620650499512
996788	PD-250	24+24	FITC	653.881755481112	287.596490981458	118.185185185185	65.4011509173236	3030.25925925926	962.368176490945	35.4757610204878	32.8892752692316	1443.64831894155	2.15907774010914	3.4320944336493	1443.64831894155	3	5.4	2.71620650499512
996788	PD-250	24+24	TRITC	981.85953804902	354.538019258492	253.037037037037	49.7072053912335	2754.88888888889	784.267631582942	35.4757610204878	32.8892752692316	1443.64831894155	2.15907774010914	3.4320944336493	1443.64831894155	3	5.4	2.71620650499512
996746	PD-100	24+24	FITC	904.754329167278	287.973382364056	180.833333333333	90.649454104323	3767.38888888889	590.044478770969	49.8506957380614	44.5705630443834	2891.71413424299	12.424630940438	10.2270733201918	2891.71413424299	3	3.6	1.26491106406735
996746	PD-100	24+24	TRITC	1256.62642994875	305.618139954554	359.722222222222	82.3091772136909	3210.94444444444	718.663176625816	49.8506957380614	44.5705630443834	2891.71413424299	12.424630940438	10.2270733201918	2891.71413424299	3	3.6	1.26491106406735
996747	PD-100	24+24	FITC	904.754329167278	287.973382364056	180.833333333333	90.649454104323	3767.38888888889	590.044478770969	36.4120046832149	39.3716357445315	1858.11187068613	6.95760235518996	10.7867006033886	1858.11187068613	3	3.6	1.26491106406735
996747	PD-100	24+24	TRITC	1256.62642994875	305.618139954554	359.722222222222	82.3091772136909	3210.94444444444	718.663176625816	36.4120046832149	39.3716357445315	1858.11187068613	6.95760235518996	10.7867006033886	1858.11187068613	3	3.6	1.26491106406735
996748	PD-100	24+24	FITC	904.754329167278	287.973382364056	180.833333333333	90.649454104323	3767.38888888889	590.044478770969	28.0312365229471	27.1849653200687	970.73934312085	5.19943097936866	4.41598795323268	970.73934312085	5	3.6	1.26491106406735
996748	PD-100	24+24	TRITC	1256.62642994875	305.618139954554	359.722222222222	82.3091772136909	3210.94444444444	718.663176625816	28.0312365229471	27.1849653200687	970.73934312085	5.19943097936866	4.41598795323268	970.73934312085	5	3.6	1.26491106406735
996749	PD-100	24+24	FITC	904.754329167278	287.973382364056	180.833333333333	90.649454104323	3767.38888888889	590.044478770969	26.9102512649055	26.910243826178	898.247717894601	1.80135613258214	0.900669476788427	898.247717894601	2	3.6	1.26491106406735
996749	PD-100	24+24	TRITC	1256.62642994875	305.618139954554	359.722222222222	82.3091772136909	3210.94444444444	718.663176625816	26.9102512649055	26.910243826178	898.247717894601	1.80135613258214	0.900669476788427	898.247717894601	2	3.6	1.26491106406735
996750	PD-100	24+24	FITC	904.754329167278	287.973382364056	180.833333333333	90.649454104323	3767.38888888889	590.044478770969	45.2482407423215	43.4227620504769	2489.05288942629	7.4292685446086	6.83855576530817	2489.05288942629	5	3.6	1.26491106406735
996750	PD-100	24+24	TRITC	1256.62642994875	305.618139954554	359.722222222222	82.3091772136909	3210.94444444444	718.663176625816	45.2482407423215	43.4227620504769	2489.05288942629	7.4292685446086	6.83855576530817	2489.05288942629	5	3.6	1.26491106406735
996757	XAV-1	24+24	FITC	896.915013360788	295.447906415889	201.36	104.413792192411	3523.24	775.380566775653	63.5370616486016	57.5805015680513	4545.62570791051	0	0	4545.62570791051	1	4.16666666666667	2.03752672412294
996757	XAV-1	24+24	TRITC	1276.83075665152	315.097175123765	378.8	85.5769634111112	3382.48	631.681494109175	63.5370616486016	57.5805015680513	4545.62570791051	0	0	4545.62570791051	1	4.16666666666667	2.03752672412294
996758	XAV-1	24+24	FITC	896.915013360788	295.447906415889	201.36	104.413792192411	3523.24	775.380566775653	51.2921930003632	50.7026365251649	3265.52937134777	6.91577710856293	5.19353756094399	3265.52937134777	3	4.16666666666667	2.03752672412294
996758	XAV-1	24+24	TRITC	1276.83075665152	315.097175123765	378.8	85.5769634111112	3382.48	631.681494109175	51.2921930003632	50.7026365251649	3265.52937134777	6.91577710856293	5.19353756094399	3265.52937134777	3	4.16666666666667	2.03752672412294
996759	XAV-1	24+24	FITC	896.915013360788	295.447906415889	201.36	104.413792192411	3523.24	775.380566775653	46.0204131052096	47.2299324091454	2992.16976819828	14.282876002376	20.0043296332356	2992.16976819828	7	4.16666666666667	2.03752672412294
996759	XAV-1	24+24	TRITC	1276.83075665152	315.097175123765	378.8	85.5769634111112	3382.48	631.681494109175	46.0204131052096	47.2299324091454	2992.16976819828	14.282876002376	20.0043296332356	2992.16976819828	7	4.16666666666667	2.03752672412294
996760	XAV-1	24+24	FITC	896.915013360788	295.447906415889	201.36	104.413792192411	3523.24	775.380566775653	39.4107355439799	36.1451807028571	1795.10316853196	3.62130795103137	6.87357992988052	1795.10316853196	4	4.16666666666667	2.03752672412294
996760	XAV-1	24+24	TRITC	1276.83075665152	315.097175123765	378.8	85.5769634111112	3382.48	631.681494109175	39.4107355439799	36.1451807028571	1795.10316853196	3.62130795103137	6.87357992988052	1795.10316853196	4	4.16666666666667	2.03752672412294
996761	XAV-1	24+24	FITC	896.915013360788	295.447906415889	201.36	104.413792192411	3523.24	775.380566775653	36.1079856537728	35.7392519445066	1601.13559607447	2.07667520007379	3.29491826741976	1601.13559607447	4	4.16666666666667	2.03752672412294
996761	XAV-1	24+24	TRITC	1276.83075665152	315.097175123765	378.8	85.5769634111112	3382.48	631.681494109175	36.1079856537728	35.7392519445066	1601.13559607447	2.07667520007379	3.29491826741976	1601.13559607447	4	4.16666666666667	2.03752672412294
996762	XAV-1	24+24	FITC	896.915013360788	295.447906415889	201.36	104.413792192411	3523.24	775.380566775653	50.3858541640393	43.4586533053935	2754.78698782908	7.96152836920245	8.2859154080584	2754.78698782908	6	4.16666666666667	2.03752672412294
996762	XAV-1	24+24	TRITC	1276.83075665152	315.097175123765	378.8	85.5769634111112	3382.48	631.681494109175	50.3858541640393	43.4586533053935	2754.78698782908	7.96152836920245	8.2859154080584	2754.78698782908	6	4.16666666666667	2.03752672412294
996773	XAV-2	24+24	FITC	720.012140106318	250.289256099422	146.55	82.3909007495111	2804.4	842.355931770813	39.0749224599665	36.5766616510412	1770.7198510094	2.26963325551714	2.40050649810098	1770.7198510094	2	4	1.15470053837925
996773	XAV-2	24+24	TRITC	1099.19488675141	305.358680316412	306.2	59.2066852555298	3030.65	857.598131564638	39.0749224599665	36.5766616510412	1770.7198510094	2.26963325551714	2.40050649810098	1770.7198510094	2	4	1.15470053837925
996774	XAV-2	24+24	FITC	720.012140106318	250.289256099422	146.55	82.3909007495111	2804.4	842.355931770813	43.8497971139189	44.1969055471411	2421.63851596224	5.16556230193079	16.971749728239	2421.63851596224	5	4	1.15470053837925
996774	XAV-2	24+24	TRITC	1099.19488675141	305.358680316412	306.2	59.2066852555298	3030.65	857.598131564638	43.8497971139189	44.1969055471411	2421.63851596224	5.16556230193079	16.971749728239	2421.63851596224	5	4	1.15470053837925
996775	XAV-2	24+24	FITC	720.012140106318	250.289256099422	146.55	82.3909007495111	2804.4	842.355931770813	39.4871678763973	38.1082548727187	1903.6479055669	6.19794447013424	7.52376115351168	1903.6479055669	4	4	1.15470053837925
996775	XAV-2	24+24	TRITC	1099.19488675141	305.358680316412	306.2	59.2066852555298	3030.65	857.598131564638	39.4871678763973	38.1082548727187	1903.6479055669	6.19794447013424	7.52376115351168	1903.6479055669	4	4	1.15470053837925
996776	XAV-2	24+24	FITC	720.012140106318	250.289256099422	146.55	82.3909007495111	2804.4	842.355931770813	51.1465528026076	43.3835712439454	2867.20348045223	17.1373085542303	8.2160693912495	2867.20348045223	4	4	1.15470053837925
996776	XAV-2	24+24	TRITC	1099.19488675141	305.358680316412	306.2	59.2066852555298	3030.65	857.598131564638	51.1465528026076	43.3835712439454	2867.20348045223	17.1373085542303	8.2160693912495	2867.20348045223	4	4	1.15470053837925
996777	XAV-2	24+24	FITC	720.012140106318	250.289256099422	146.55	82.3909007495111	2804.4	842.355931770813	47.6493900501371	41.1205559480383	2465.32358486056	7.20333198112343	5.53948147662907	2465.32358486056	5	4	1.15470053837925
996777	XAV-2	24+24	TRITC	1099.19488675141	305.358680316412	306.2	59.2066852555298	3030.65	857.598131564638	47.6493900501371	41.1205559480383	2465.32358486056	7.20333198112343	5.53948147662907	2465.32358486056	5	4	1.15470053837925
1001976	C59-1	24	FITC	797.684019633432	291.654728031531	183.858974358974	85.6029378605838	2785.82051282051	918.922798837373	34.2212651280297	34.591346701764	1497.62999617839	6.68745952219099	5.32301092618448	1497.62999617839	20	15.6	3.02581485810939
1001976	C59-1	24	TRITC	871.588938125364	222.854280948187	323.615384615385	74.1199853465462	2060.11538461538	624.567964562418	34.2212651280297	34.591346701764	1497.62999617839	6.68745952219099	5.32301092618448	1497.62999617839	20	15.6	3.02581485810939
1001977	C59-1	24	FITC	797.684019633432	291.654728031531	183.858974358974	85.6029378605838	2785.82051282051	918.922798837373	37.4908765139848	37.3206646517053	1786.24275273704	6.8743170509009	6.54363796472019	1786.24275273704	13	15.6	3.02581485810939
1001977	C59-1	24	TRITC	871.588938125364	222.854280948187	323.615384615385	74.1199853465462	2060.11538461538	624.567964562418	37.4908765139848	37.3206646517053	1786.24275273704	6.8743170509009	6.54363796472019	1786.24275273704	13	15.6	3.02581485810939
1001978	C59-1	24	FITC	797.684019633432	291.654728031531	183.858974358974	85.6029378605838	2785.82051282051	918.922798837373	37.5342516482667	37.6406781967788	1793.24656809414	7.39874682760097	7.01059483897846	1793.24656809414	16	15.6	3.02581485810939
1001978	C59-1	24	TRITC	871.588938125364	222.854280948187	323.615384615385	74.1199853465462	2060.11538461538	624.567964562418	37.5342516482667	37.6406781967788	1793.24656809414	7.39874682760097	7.01059483897846	1793.24656809414	16	15.6	3.02581485810939
1001979	C59-1	24	FITC	797.684019633432	291.654728031531	183.858974358974	85.6029378605838	2785.82051282051	918.922798837373	42.1102191007738	42.7475823877496	2274.80378629538	7.20879299227185	7.286022085623	2274.80378629538	17	15.6	3.02581485810939
1001979	C59-1	24	TRITC	871.588938125364	222.854280948187	323.615384615385	74.1199853465462	2060.11538461538	624.567964562418	42.1102191007738	42.7475823877496	2274.80378629538	7.20879299227185	7.286022085623	2274.80378629538	17	15.6	3.02581485810939
1001980	C59-1	24	FITC	797.684019633432	291.654728031531	183.858974358974	85.6029378605838	2785.82051282051	918.922798837373	43.7257115166453	41.3145198724807	2282.89571191067	9.65325981510219	6.85683837913528	2282.89571191067	12	15.6	3.02581485810939
1001980	C59-1	24	TRITC	871.588938125364	222.854280948187	323.615384615385	74.1199853465462	2060.11538461538	624.567964562418	43.7257115166453	41.3145198724807	2282.89571191067	9.65325981510219	6.85683837913528	2282.89571191067	12	15.6	3.02581485810939
1002001	C59-2	24	FITC	867.481969640454	271.930388966699	209.083333333333	84.6246755638432	2917.30555555556	728.85443655269	42.2796321395567	38.9897228209334	2085.76291603066	7.30954169263059	6.75012901360767	2085.76291603066	13	12	0.894427190999916
1002001	C59-2	24	TRITC	955.668451575671	202.227573002932	344.944444444444	59.6762429133568	2370.77777777778	668.851301480429	42.2796321395567	38.9897228209334	2085.76291603066	7.30954169263059	6.75012901360767	2085.76291603066	13	12	0.894427190999916
1002002	C59-2	24	FITC	867.481969640454	271.930388966699	209.083333333333	84.6246755638432	2917.30555555556	728.85443655269	49.4686015104002	41.0151123197461	2604.56469586664	10.6121544972716	8.37040232428087	2604.56469586664	12	12	0.894427190999916
1002002	C59-2	24	TRITC	955.668451575671	202.227573002932	344.944444444444	59.6762429133568	2370.77777777778	668.851301480429	49.4686015104002	41.0151123197461	2604.56469586664	10.6121544972716	8.37040232428087	2604.56469586664	12	12	0.894427190999916
1002003	C59-2	24	FITC	867.481969640454	271.930388966699	209.083333333333	84.6246755638432	2917.30555555556	728.85443655269	40.0906665023974	38.0018154156138	1921.46558323487	5.9531763191664	5.51027665904763	1921.46558323487	11	12	0.894427190999916
1002003	C59-2	24	TRITC	955.668451575671	202.227573002932	344.944444444444	59.6762429133568	2370.77777777778	668.851301480429	40.0906665023974	38.0018154156138	1921.46558323487	5.9531763191664	5.51027665904763	1921.46558323487	11	12	0.894427190999916
1001986	PD-100, C59-1	24	FITC	725.588002903266	235.809946720889	198.5	86.3929560620706	2498	952.659975317232	41.4856712643169	35.2491979594048	1809.16365920485	7.65965769337357	4.08717900220751	1809.16365920485	8	7.2	1.81352940116473
1001986	PD-100, C59-1	24	TRITC	659.096593601381	164.420492141152	156.5	37.1402746354951	1811.58333333333	571.292738319981	41.4856712643169	35.2491979594048	1809.16365920485	7.65965769337357	4.08717900220751	1809.16365920485	8	7.2	1.81352940116473
1001987	PD-100, C59-1	24	FITC	725.588002903266	235.809946720889	198.5	86.3929560620706	2498	952.659975317232	38.2693526709232	35.9859342631377	1722.88863519146	7.00919146590128	2.96667039906485	1722.88863519146	8	7.2	1.81352940116473
1001987	PD-100, C59-1	24	TRITC	659.096593601381	164.420492141152	156.5	37.1402746354951	1811.58333333333	571.292738319981	38.2693526709232	35.9859342631377	1722.88863519146	7.00919146590128	2.96667039906485	1722.88863519146	8	7.2	1.81352940116473
1001988	PD-100, C59-1	24	FITC	725.588002903266	235.809946720889	198.5	86.3929560620706	2498	952.659975317232	43.8496471271373	39.9228104347004	2182.99972966378	5.84068633197847	7.98830503340698	2182.99972966378	7	7.2	1.81352940116473
1001988	PD-100, C59-1	24	TRITC	659.096593601381	164.420492141152	156.5	37.1402746354951	1811.58333333333	571.292738319981	43.8496471271373	39.9228104347004	2182.99972966378	5.84068633197847	7.98830503340698	2182.99972966378	7	7.2	1.81352940116473
1001989	PD-100, C59-1	24	FITC	725.588002903266	235.809946720889	198.5	86.3929560620706	2498	952.659975317232	37.988065734023	39.3651859397069	1891.89606914408	5.51152073875835	5.69046995218423	1891.89606914408	9	7.2	1.81352940116473
1001989	PD-100, C59-1	24	TRITC	659.096593601381	164.420492141152	156.5	37.1402746354951	1811.58333333333	571.292738319981	37.988065734023	39.3651859397069	1891.89606914408	5.51152073875835	5.69046995218423	1891.89606914408	9	7.2	1.81352940116473
1001990	PD-100, C59-1	24	FITC	725.588002903266	235.809946720889	198.5	86.3929560620706	2498	952.659975317232	37.657448902954	39.0996703255899	1837.97749045288	4.34393651491547	3.14014037173111	1837.97749045288	4	7.2	1.81352940116473
1001990	PD-100, C59-1	24	TRITC	659.096593601381	164.420492141152	156.5	37.1402746354951	1811.58333333333	571.292738319981	37.657448902954	39.0996703255899	1837.97749045288	4.34393651491547	3.14014037173111	1837.97749045288	4	7.2	1.81352940116473
1001991	PD-100, C59-2	24	FITC	636.208893641427	168.636586896404	182.884615384615	61.9853704824465	1873.84615384615	633.252852646252	38.5904840402235	40.0109984729438	1948.46732765955	5.32771583096487	5.76431527712256	1948.46732765955	3	5.2	1.81352940116473
1001991	PD-100, C59-2	24	TRITC	593.60441394014	113.380350879975	153.423076923077	35.7683358035266	1589.84615384615	429.851852833759	38.5904840402235	40.0109984729438	1948.46732765955	5.32771583096487	5.76431527712256	1948.46732765955	3	5.2	1.81352940116473
1001992	PD-100, C59-2	24	FITC	636.208893641427	168.636586896404	182.884615384615	61.9853704824465	1873.84615384615	633.252852646252	34.1896646250262	34.9751923140473	1522.42182597268	5.05123781697997	8.09787351193722	1522.42182597268	4	5.2	1.81352940116473
1001992	PD-100, C59-2	24	TRITC	593.60441394014	113.380350879975	153.423076923077	35.7683358035266	1589.84615384615	429.851852833759	34.1896646250262	34.9751923140473	1522.42182597268	5.05123781697997	8.09787351193722	1522.42182597268	4	5.2	1.81352940116473
1001993	PD-100, C59-2	24	FITC	636.208893641427	168.636586896404	182.884615384615	61.9853704824465	1873.84615384615	633.252852646252	33.9303165224809	34.1188916998952	1452.41679445319	4.37277478005089	3.86677372887612	1452.41679445319	8	5.2	1.81352940116473
1001993	PD-100, C59-2	24	TRITC	593.60441394014	113.380350879975	153.423076923077	35.7683358035266	1589.84615384615	429.851852833759	33.9303165224809	34.1188916998952	1452.41679445319	4.37277478005089	3.86677372887612	1452.41679445319	8	5.2	1.81352940116473
1001994	PD-100, C59-2	24	FITC	636.208893641427	168.636586896404	182.884615384615	61.9853704824465	1873.84615384615	633.252852646252	37.452690837877	35.7575689661104	1685.29964405554	5.46322514287251	3.65140510654823	1685.29964405554	5	5.2	1.81352940116473
1001994	PD-100, C59-2	24	TRITC	593.60441394014	113.380350879975	153.423076923077	35.7683358035266	1589.84615384615	429.851852833759	37.452690837877	35.7575689661104	1685.29964405554	5.46322514287251	3.65140510654823	1685.29964405554	5	5.2	1.81352940116473
1001995	PD-100, C59-2	24	FITC	636.208893641427	168.636586896404	182.884615384615	61.9853704824465	1873.84615384615	633.252852646252	30.0785558963363	31.6211358486983	1194.59752028462	2.72076418362035	4.55580015803461	1194.59752028462	6	5.2	1.81352940116473
1001995	PD-100, C59-2	24	TRITC	593.60441394014	113.380350879975	153.423076923077	35.7683358035266	1589.84615384615	429.851852833759	30.0785558963363	31.6211358486983	1194.59752028462	2.72076418362035	4.55580015803461	1194.59752028462	6	5.2	1.81352940116473
1002019	PD-100, XAV-1, A83, LDN	24	FITC	883.793077477407	269.047376067065	218.631578947368	90.9589812669162	3033.21052631579	854.264474456614	35.1672735457433	33.6122968538282	1473.34165353641	3.76087696755427	3.64170705595918	1473.34165353641	13	12.6666666666667	0.516397779494322
1002019	PD-100, XAV-1, A83, LDN	24	TRITC	985.161661749605	197.126372813675	339.763157894737	58.6881056186816	2304.76315789474	608.98743759335	35.1672735457433	33.6122968538282	1473.34165353641	3.76087696755427	3.64170705595918	1473.34165353641	13	12.6666666666667	0.516397779494322
1002020	PD-100, XAV-1, A83, LDN	24	FITC	883.793077477407	269.047376067065	218.631578947368	90.9589812669162	3033.21052631579	854.264474456614	35.1286840515045	36.8698961516018	1623.49920106905	3.73288740408605	4.13282033110624	1623.49920106905	13	12.6666666666667	0.516397779494322
1002020	PD-100, XAV-1, A83, LDN	24	TRITC	985.161661749605	197.126372813675	339.763157894737	58.6881056186816	2304.76315789474	608.98743759335	35.1286840515045	36.8698961516018	1623.49920106905	3.73288740408605	4.13282033110624	1623.49920106905	13	12.6666666666667	0.516397779494322
1002021	PD-100, XAV-1, A83, LDN	24	FITC	883.793077477407	269.047376067065	218.631578947368	90.9589812669162	3033.21052631579	854.264474456614	34.0327672106936	34.3204947689779	1470.6094284808	6.36579929374238	6.50470998029636	1470.6094284808	12	12.6666666666667	0.516397779494322
1002021	PD-100, XAV-1, A83, LDN	24	TRITC	985.161661749605	197.126372813675	339.763157894737	58.6881056186816	2304.76315789474	608.98743759335	34.0327672106936	34.3204947689779	1470.6094284808	6.36579929374238	6.50470998029636	1470.6094284808	12	12.6666666666667	0.516397779494322
1002013	PD-100, XAV-1, A83	24	FITC	902.965753396239	319.802990587227	230.775510204082	103.838268737599	3056.12244897959	830.214872604603	31.5075888616751	31.893497182209	1264.5961139283	5.19618626633804	5.23699061249299	1264.5961139283	21	16.3333333333333	3.61478445646026
1002013	PD-100, XAV-1, A83	24	TRITC	1057.93365112048	257.140529663382	366.244897959184	70.0135494661108	2493.71428571429	701.109448184328	31.5075888616751	31.893497182209	1264.5961139283	5.19618626633804	5.23699061249299	1264.5961139283	21	16.3333333333333	3.61478445646026
1002014	PD-100, XAV-1, A83	24	FITC	902.965753396239	319.802990587227	230.775510204082	103.838268737599	3056.12244897959	830.214872604603	32.2250568674433	34.0350472883613	1379.29208498515	4.97857401747553	4.33684425223914	1379.29208498515	14	16.3333333333333	3.61478445646026
1002014	PD-100, XAV-1, A83	24	TRITC	1057.93365112048	257.140529663382	366.244897959184	70.0135494661108	2493.71428571429	701.109448184328	32.2250568674433	34.0350472883613	1379.29208498515	4.97857401747553	4.33684425223914	1379.29208498515	14	16.3333333333333	3.61478445646026
1002015	PD-100, XAV-1, A83	24	FITC	902.965753396239	319.802990587227	230.775510204082	103.838268737599	3056.12244897959	830.214872604603	35.8968690073543	39.1172663181129	1812.31397859118	6.84288491130688	10.7446920237708	1812.31397859118	14	16.3333333333333	3.61478445646026
1002015	PD-100, XAV-1, A83	24	TRITC	1057.93365112048	257.140529663382	366.244897959184	70.0135494661108	2493.71428571429	701.109448184328	35.8968690073543	39.1172663181129	1812.31397859118	6.84288491130688	10.7446920237708	1812.31397859118	14	16.3333333333333	3.61478445646026
1002028	PD-100, XAV-2, A83, LDN	24	FITC	953.578845450289	258.637388553809	238.121951219512	109.165744426068	3118.70731707317	728.644022959855	33.3511025327304	33.0174578165927	1410.3601450653	6.28292836095397	6.6896399195567	1410.3601450653	11	13.6666666666667	2.25092573548455
1002028	PD-100, XAV-2, A83, LDN	24	TRITC	996.107147860871	179.392009349764	334.658536585366	73.0454001823857	2336.90243902439	583.236050192289	33.3511025327304	33.0174578165927	1410.3601450653	6.28292836095397	6.6896399195567	1410.3601450653	11	13.6666666666667	2.25092573548455
1002029	PD-100, XAV-2, A83, LDN	24	FITC	953.578845450289	258.637388553809	238.121951219512	109.165744426068	3118.70731707317	728.644022959855	31.3981995152905	30.1822777513944	1224.76541028099	8.23267034351536	5.62299997188342	1224.76541028099	14	13.6666666666667	2.25092573548455
1002029	PD-100, XAV-2, A83, LDN	24	TRITC	996.107147860871	179.392009349764	334.658536585366	73.0454001823857	2336.90243902439	583.236050192289	31.3981995152905	30.1822777513944	1224.76541028099	8.23267034351536	5.62299997188342	1224.76541028099	14	13.6666666666667	2.25092573548455
1002030	PD-100, XAV-2, A83, LDN	24	FITC	953.578845450289	258.637388553809	238.121951219512	109.165744426068	3118.70731707317	728.644022959855	33.1868707333995	33.1794082615666	1434.31436785678	7.58990722535028	7.94040774133952	1434.31436785678	16	13.6666666666667	2.25092573548455
1002030	PD-100, XAV-2, A83, LDN	24	TRITC	996.107147860871	179.392009349764	334.658536585366	73.0454001823857	2336.90243902439	583.236050192289	33.1868707333995	33.1794082615666	1434.31436785678	7.58990722535028	7.94040774133952	1434.31436785678	16	13.6666666666667	2.25092573548455
1002034	PD-100, XAV-2, A83	24	FITC	872.784819951744	213.226748465945	215.121951219512	75.1758588650476	3108.82926829268	750.484173798456	33.2965614671377	35.4633036558542	1502.96792289081	5.50660621475308	6.02592134515706	1502.96792289081	12	13.6666666666667	3.38624669312008
1002034	PD-100, XAV-2, A83	24	TRITC	972.86879829442	177.916760042531	337.780487804878	47.4950061559749	2302.0243902439	595.006196934321	33.2965614671377	35.4633036558542	1502.96792289081	5.50660621475308	6.02592134515706	1502.96792289081	12	13.6666666666667	3.38624669312008
1002035	PD-100, XAV-2, A83	24	FITC	872.784819951744	213.226748465945	215.121951219512	75.1758588650476	3108.82926829268	750.484173798456	32.0448286435124	33.2963889956938	1340.19221087224	3.67773008775228	4.55564152859745	1340.19221087224	11	13.6666666666667	3.38624669312008
1002035	PD-100, XAV-2, A83	24	TRITC	972.86879829442	177.916760042531	337.780487804878	47.4950061559749	2302.0243902439	595.006196934321	32.0448286435124	33.2963889956938	1340.19221087224	3.67773008775228	4.55564152859745	1340.19221087224	11	13.6666666666667	3.38624669312008
1002036	PD-100, XAV-2, A83	24	FITC	872.784819951744	213.226748465945	215.121951219512	75.1758588650476	3108.82926829268	750.484173798456	31.1422825590103	29.6637851356104	1198.07067881424	7.36687392966112	6.00965063723593	1198.07067881424	18	13.6666666666667	3.38624669312008
1002036	PD-100, XAV-2, A83	24	TRITC	972.86879829442	177.916760042531	337.780487804878	47.4950061559749	2302.0243902439	595.006196934321	31.1422825590103	29.6637851356104	1198.07067881424	7.36687392966112	6.00965063723593	1198.07067881424	18	13.6666666666667	3.38624669312008
1001965	PD-100	24	FITC	867.432384959502	351.326389138884	198.591549295775	109.120847486339	3127.98591549296	854.078007359946	47.8779014859868	41.4220103699605	2501.16383699929	10.9542397752518	5.44147333968698	2501.16383699929	13	14.2	1.81352940116473
1001965	PD-100	24	TRITC	1100.32093709482	316.318741208609	361.30985915493	80.2899373786379	2629.3661971831	741.667199903349	47.8779014859868	41.4220103699605	2501.16383699929	10.9542397752518	5.44147333968698	2501.16383699929	13	14.2	1.81352940116473
1001966	PD-100	24	FITC	867.432384959502	351.326389138884	198.591549295775	109.120847486339	3127.98591549296	854.078007359946	37.0765674496716	32.8172953506989	1510.30458571568	5.98173940573826	4.04322958247443	1510.30458571568	14	14.2	1.81352940116473
1001966	PD-100	24	TRITC	1100.32093709482	316.318741208609	361.30985915493	80.2899373786379	2629.3661971831	741.667199903349	37.0765674496716	32.8172953506989	1510.30458571568	5.98173940573826	4.04322958247443	1510.30458571568	14	14.2	1.81352940116473
1001967	PD-100	24	FITC	867.432384959502	351.326389138884	198.591549295775	109.120847486339	3127.98591549296	854.078007359946	36.3811452853806	33.1600280131148	1491.27661131562	8.12609859579256	5.93420040537155	1491.27661131562	12	14.2	1.81352940116473
1001967	PD-100	24	TRITC	1100.32093709482	316.318741208609	361.30985915493	80.2899373786379	2629.3661971831	741.667199903349	36.3811452853806	33.1600280131148	1491.27661131562	8.12609859579256	5.93420040537155	1491.27661131562	12	14.2	1.81352940116473
1001968	PD-100	24	FITC	867.432384959502	351.326389138884	198.591549295775	109.120847486339	3127.98591549296	854.078007359946	40.4937378326463	37.2100877529713	1896.61390503564	8.65487197291352	5.81247185449912	1896.61390503564	15	14.2	1.81352940116473
1001968	PD-100	24	TRITC	1100.32093709482	316.318741208609	361.30985915493	80.2899373786379	2629.3661971831	741.667199903349	40.4937378326463	37.2100877529713	1896.61390503564	8.65487197291352	5.81247185449912	1896.61390503564	15	14.2	1.81352940116473
1001969	PD-100	24	FITC	867.432384959502	351.326389138884	198.591549295775	109.120847486339	3127.98591549296	854.078007359946	36.7524276954525	36.9644137341694	1730.88514788365	5.50078385622882	7.9961899054743	1730.88514788365	17	14.2	1.81352940116473
1001969	PD-100	24	TRITC	1100.32093709482	316.318741208609	361.30985915493	80.2899373786379	2629.3661971831	741.667199903349	36.7524276954525	36.9644137341694	1730.88514788365	5.50078385622882	7.9961899054743	1730.88514788365	17	14.2	1.81352940116473
1002010	PD-250, C59-1	24	FITC	953.741451717971	332.104250156664	228.785714285714	95.9673561659242	3411.16666666667	740.375676448398	33.5883142052592	33.5062835779959	1459.25077358429	7.22073513470765	8.51668602033786	1459.25077358429	14	14	0.894427190999916
1002010	PD-250, C59-1	24	TRITC	977.133119397398	227.579068455267	346.5	57.3832855752843	2321.11904761905	744.473990188619	33.5883142052592	33.5062835779959	1459.25077358429	7.22073513470765	8.51668602033786	1459.25077358429	14	14	0.894427190999916
1002011	PD-250, C59-1	24	FITC	953.741451717971	332.104250156664	228.785714285714	95.9673561659242	3411.16666666667	740.375676448398	42.4295746471268	40.9484875115829	2195.00913788207	8.79482088308452	6.74549535025911	2195.00913788207	15	14	0.894427190999916
1002011	PD-250, C59-1	24	TRITC	977.133119397398	227.579068455267	346.5	57.3832855752843	2321.11904761905	744.473990188619	42.4295746471268	40.9484875115829	2195.00913788207	8.79482088308452	6.74549535025911	2195.00913788207	15	14	0.894427190999916
1002012	PD-250, C59-1	24	FITC	953.741451717971	332.104250156664	228.785714285714	95.9673561659242	3411.16666666667	740.375676448398	36.7733898336045	34.3162255402355	1605.4324549762	6.10478137289358	6.709326859852	1605.4324549762	13	14	0.894427190999916
1002012	PD-250, C59-1	24	TRITC	977.133119397398	227.579068455267	346.5	57.3832855752843	2321.11904761905	744.473990188619	36.7733898336045	34.3162255402355	1605.4324549762	6.10478137289358	6.709326859852	1605.4324549762	13	14	0.894427190999916
1002037	PD-250, C59-2	24	FITC	900.373370103991	281.579442894849	208.909090909091	82.0685527915161	3196.70454545455	859.013538609108	38.1422840807745	36.2191829866386	1753.62824945943	8.70410657664567	5.14925482143325	1753.62824945943	14	14.6666666666667	1.03279555898864
1002037	PD-250, C59-2	24	TRITC	898.115123976489	159.353594433385	308.454545454545	54.7987669804648	2196.38636363636	588.143362364523	38.1422840807745	36.2191829866386	1753.62824945943	8.70410657664567	5.14925482143325	1753.62824945943	14	14.6666666666667	1.03279555898864
1002038	PD-250, C59-2	24	FITC	900.373370103991	281.579442894849	208.909090909091	82.0685527915161	3196.70454545455	859.013538609108	32.3520971220054	30.8212918634413	1271.66223222302	6.02541757349497	5.11094768184297	1271.66223222302	14	14.6666666666667	1.03279555898864
1002038	PD-250, C59-2	24	TRITC	898.115123976489	159.353594433385	308.454545454545	54.7987669804648	2196.38636363636	588.143362364523	32.3520971220054	30.8212918634413	1271.66223222302	6.02541757349497	5.11094768184297	1271.66223222302	14	14.6666666666667	1.03279555898864
1002039	PD-250, C59-2	24	FITC	900.373370103991	281.579442894849	208.909090909091	82.0685527915161	3196.70454545455	859.013538609108	40.2656745736884	38.831963843776	1956.34814414402	5.31669332007511	4.00027247855209	1956.34814414402	16	14.6666666666667	1.03279555898864
1002039	PD-250, C59-2	24	TRITC	898.115123976489	159.353594433385	308.454545454545	54.7987669804648	2196.38636363636	588.143362364523	40.2656745736884	38.831963843776	1956.34814414402	5.31669332007511	4.00027247855209	1956.34814414402	16	14.6666666666667	1.03279555898864
1002022	PD-250, XAV-1, A83, LDN	24	FITC	852.53516461782	262.962477159824	226.236842105263	95.8569977173279	2862.5	780.800343029942	31.2336128289131	31.4577192033344	1254.07847631387	5.96085387401742	5.92428248020655	1254.07847631387	14	12.6666666666667	1.36626010212795
1002022	PD-250, XAV-1, A83, LDN	24	TRITC	863.098574049746	182.439405922913	313.342105263158	64.402147150621	2075.89473684211	581.758879627638	31.2336128289131	31.4577192033344	1254.07847631387	5.96085387401742	5.92428248020655	1254.07847631387	14	12.6666666666667	1.36626010212795
1002023	PD-250, XAV-1, A83, LDN	24	FITC	852.53516461782	262.962477159824	226.236842105263	95.8569977173279	2862.5	780.800343029942	34.7136396075882	35.0712047222374	1513.55900855482	4.68967729397587	3.12688054973956	1513.55900855482	13	12.6666666666667	1.36626010212795
1002023	PD-250, XAV-1, A83, LDN	24	TRITC	863.098574049746	182.439405922913	313.342105263158	64.402147150621	2075.89473684211	581.758879627638	34.7136396075882	35.0712047222374	1513.55900855482	4.68967729397587	3.12688054973956	1513.55900855482	13	12.6666666666667	1.36626010212795
1002024	PD-250, XAV-1, A83, LDN	24	FITC	852.53516461782	262.962477159824	226.236842105263	95.8569977173279	2862.5	780.800343029942	35.0174238073728	32.4752045658765	1518.6505226202	10.8299473080146	8.49634982644267	1518.6505226202	11	12.6666666666667	1.36626010212795
1002024	PD-250, XAV-1, A83, LDN	24	TRITC	863.098574049746	182.439405922913	313.342105263158	64.402147150621	2075.89473684211	581.758879627638	35.0174238073728	32.4752045658765	1518.6505226202	10.8299473080146	8.49634982644267	1518.6505226202	11	12.6666666666667	1.36626010212795
1002016	PD-250, XAV-1, A83	24	FITC	843.498335715713	282.135613642521	208.066666666667	95.7132691169697	2847.66666666667	877.543017251255	31.2291550894966	33.6784508021056	1332.16061657872	4.61316775754385	5.47177222366554	1332.16061657872	12	10	1.78885438199983
1002016	PD-250, XAV-1, A83	24	TRITC	928.906886000501	236.615325093211	324.566666666667	56.9250465045065	2129.73333333333	683.292128839001	31.2291550894966	33.6784508021056	1332.16061657872	4.61316775754385	5.47177222366554	1332.16061657872	12	10	1.78885438199983
1002017	PD-250, XAV-1, A83	24	FITC	843.498335715713	282.135613642521	208.066666666667	95.7132691169697	2847.66666666667	877.543017251255	34.1951040589869	32.5245209008906	1412.52156232449	7.41515471969777	4.14367246125756	1412.52156232449	8	10	1.78885438199983
1002017	PD-250, XAV-1, A83	24	TRITC	928.906886000501	236.615325093211	324.566666666667	56.9250465045065	2129.73333333333	683.292128839001	34.1951040589869	32.5245209008906	1412.52156232449	7.41515471969777	4.14367246125756	1412.52156232449	8	10	1.78885438199983
1002018	PD-250, XAV-1, A83	24	FITC	843.498335715713	282.135613642521	208.066666666667	95.7132691169697	2847.66666666667	877.543017251255	33.5681420264871	33.2282345813144	1406.2299986785	5.52815146652437	3.64643357863162	1406.2299986785	10	10	1.78885438199983
1002018	PD-250, XAV-1, A83	24	TRITC	928.906886000501	236.615325093211	324.566666666667	56.9250465045065	2129.73333333333	683.292128839001	33.5681420264871	33.2282345813144	1406.2299986785	5.52815146652437	3.64643357863162	1406.2299986785	10	10	1.78885438199983
1002025	PD-250, XAV-2, A83, LDN	24	FITC	845.916013125118	219.153914082083	224.057142857143	88.1031957947253	2764.51428571429	723.137948414391	29.9247485319836	30.1268451885918	1161.38599118731	6.46228172048961	5.65404796429472	1161.38599118731	14	11.6666666666667	1.86189867250253
1002025	PD-250, XAV-2, A83, LDN	24	TRITC	831.030191705067	142.451842829647	313.314285714286	54.9329920307039	1985.77142857143	445.612208468456	29.9247485319836	30.1268451885918	1161.38599118731	6.46228172048961	5.65404796429472	1161.38599118731	14	11.6666666666667	1.86189867250253
1002026	PD-250, XAV-2, A83, LDN	24	FITC	845.916013125118	219.153914082083	224.057142857143	88.1031957947253	2764.51428571429	723.137948414391	30.700898494201	30.6016007936524	1192.90479726242	5.07473365414994	4.80478119680876	1192.90479726242	11	11.6666666666667	1.86189867250253
1002026	PD-250, XAV-2, A83, LDN	24	TRITC	831.030191705067	142.451842829647	313.314285714286	54.9329920307039	1985.77142857143	445.612208468456	30.700898494201	30.6016007936524	1192.90479726242	5.07473365414994	4.80478119680876	1192.90479726242	11	11.6666666666667	1.86189867250253
1002027	PD-250, XAV-2, A83, LDN	24	FITC	845.916013125118	219.153914082083	224.057142857143	88.1031957947253	2764.51428571429	723.137948414391	31.3455835583988	31.6802005788274	1258.78421208145	4.56611629651806	4.99061357330726	1258.78421208145	10	11.6666666666667	1.86189867250253
1002027	PD-250, XAV-2, A83, LDN	24	TRITC	831.030191705067	142.451842829647	313.314285714286	54.9329920307039	1985.77142857143	445.612208468456	31.3455835583988	31.6802005788274	1258.78421208145	4.56611629651806	4.99061357330726	1258.78421208145	10	11.6666666666667	1.86189867250253
1002031	PD-250, XAV-2, A83	24	FITC	863.826936012484	217.296879262832	203.604651162791	68.4290176317188	2913.3488372093	773.064984754437	32.9933253373512	32.3741182042374	1339.73085129441	3.81032130510131	3.34743336864958	1339.73085129441	14	14.3333333333333	2.25092573548455
1002031	PD-250, XAV-2, A83	24	TRITC	918.428480288537	136.665925595567	324.372093023256	47.1598211030039	2244.97674418605	553.993316461837	32.9933253373512	32.3741182042374	1339.73085129441	3.81032130510131	3.34743336864958	1339.73085129441	14	14.3333333333333	2.25092573548455
1002032	PD-250, XAV-2, A83	24	FITC	863.826936012484	217.296879262832	203.604651162791	68.4290176317188	2913.3488372093	773.064984754437	35.7635768996117	33.1016767150233	1483.07204605639	4.18175757362908	3.66393225427381	1483.07204605639	17	14.3333333333333	2.25092573548455
1002032	PD-250, XAV-2, A83	24	TRITC	918.428480288537	136.665925595567	324.372093023256	47.1598211030039	2244.97674418605	553.993316461837	35.7635768996117	33.1016767150233	1483.07204605639	4.18175757362908	3.66393225427381	1483.07204605639	17	14.3333333333333	2.25092573548455
1002033	PD-250, XAV-2, A83	24	FITC	863.826936012484	217.296879262832	203.604651162791	68.4290176317188	2913.3488372093	773.064984754437	31.939029782778	31.4844065524581	1273.75539903878	4.72394938919168	4.64259478825522	1273.75539903878	12	14.3333333333333	2.25092573548455
1002033	PD-250, XAV-2, A83	24	TRITC	918.428480288537	136.665925595567	324.372093023256	47.1598211030039	2244.97674418605	553.993316461837	31.939029782778	31.4844065524581	1273.75539903878	4.72394938919168	4.64259478825522	1273.75539903878	12	14.3333333333333	2.25092573548455
1002007	PD-250	24	FITC	857.935359618893	330.635253741942	210.818181818182	97.5457609314065	3099.43181818182	958.811555987042	34.3285623394167	33.0672594977522	1449.03902408653	5.98152466843712	6.78380134808343	1449.03902408653	15	14.6666666666667	0.516397779494322
1002007	PD-250	24	TRITC	1093.5702517357	266.873540601635	339.204545454545	68.0497695929167	2644.65909090909	813.721966778432	34.3285623394167	33.0672594977522	1449.03902408653	5.98152466843712	6.78380134808343	1449.03902408653	15	14.6666666666667	0.516397779494322
1002008	PD-250	24	FITC	857.935359618893	330.635253741942	210.818181818182	97.5457609314065	3099.43181818182	958.811555987042	36.52968238728	33.360335046659	1526.00889196677	5.4961231274745	7.53240842853623	1526.00889196677	14	14.6666666666667	0.516397779494322
1002008	PD-250	24	TRITC	1093.5702517357	266.873540601635	339.204545454545	68.0497695929167	2644.65909090909	813.721966778432	36.52968238728	33.360335046659	1526.00889196677	5.4961231274745	7.53240842853623	1526.00889196677	14	14.6666666666667	0.516397779494322
1002009	PD-250	24	FITC	857.935359618893	330.635253741942	210.818181818182	97.5457609314065	3099.43181818182	958.811555987042	36.7592088944487	33.6940969995969	1559.87735496554	7.44606173801615	4.84836746386987	1559.87735496554	15	14.6666666666667	0.516397779494322
1002009	PD-250	24	TRITC	1093.5702517357	266.873540601635	339.204545454545	68.0497695929167	2644.65909090909	813.721966778432	36.7592088944487	33.6940969995969	1559.87735496554	7.44606173801615	4.84836746386987	1559.87735496554	15	14.6666666666667	0.516397779494322
1001970	XAV-1	24	FITC	833.411084230835	249.141978441605	205.333333333333	77.9849580345702	2805.91025641026	794.618493544575	43.314632005692	40.7720932745044	2230.32419948742	8.69329234732893	8.73252657799757	2230.32419948742	11	13	1.70560573084488
1001970	XAV-1	24	TRITC	937.336257628815	180.234481405934	347.717948717949	57.7866423777679	2294.87179487179	601.544362215805	43.314632005692	40.7720932745044	2230.32419948742	8.69329234732893	8.73252657799757	2230.32419948742	11	13	1.70560573084488
1001971	XAV-1	24	FITC	833.411084230835	249.141978441605	205.333333333333	77.9849580345702	2805.91025641026	794.618493544575	36.4800568971435	36.6008652926804	1682.27719659718	3.89283612413384	6.37589081563692	1682.27719659718	12	13	1.70560573084488
1001971	XAV-1	24	TRITC	937.336257628815	180.234481405934	347.717948717949	57.7866423777679	2294.87179487179	601.544362215805	36.4800568971435	36.6008652926804	1682.27719659718	3.89283612413384	6.37589081563692	1682.27719659718	12	13	1.70560573084488
1001972	XAV-1	24	FITC	833.411084230835	249.141978441605	205.333333333333	77.9849580345702	2805.91025641026	794.618493544575	36.0541685599763	37.3118956747986	1675.88658761877	3.6808006140743	5.354107464627	1675.88658761877	13	13	1.70560573084488
1001972	XAV-1	24	TRITC	937.336257628815	180.234481405934	347.717948717949	57.7866423777679	2294.87179487179	601.544362215805	36.0541685599763	37.3118956747986	1675.88658761877	3.6808006140743	5.354107464627	1675.88658761877	13	13	1.70560573084488
1001973	XAV-1	24	FITC	833.411084230835	249.141978441605	205.333333333333	77.9849580345702	2805.91025641026	794.618493544575	38.1938289228615	40.8357797113862	1947.62870247088	5.37887904283512	4.97411996418198	1947.62870247088	12	13	1.70560573084488
1001973	XAV-1	24	TRITC	937.336257628815	180.234481405934	347.717948717949	57.7866423777679	2294.87179487179	601.544362215805	38.1938289228615	40.8357797113862	1947.62870247088	5.37887904283512	4.97411996418198	1947.62870247088	12	13	1.70560573084488
1001974	XAV-1	24	FITC	833.411084230835	249.141978441605	205.333333333333	77.9849580345702	2805.91025641026	794.618493544575	34.0604828887547	33.4845246734866	1430.75948436581	6.44298888895409	3.51733216428475	1430.75948436581	14	13	1.70560573084488
1001974	XAV-1	24	TRITC	937.336257628815	180.234481405934	347.717948717949	57.7866423777679	2294.87179487179	601.544362215805	34.0604828887547	33.4845246734866	1430.75948436581	6.44298888895409	3.51733216428475	1430.75948436581	14	13	1.70560573084488
1001975	XAV-1	24	FITC	833.411084230835	249.141978441605	205.333333333333	77.9849580345702	2805.91025641026	794.618493544575	34.5131526761126	33.5850201871524	1471.85774079514	6.66369976898326	5.41259705777252	1471.85774079514	16	13	1.70560573084488
1001975	XAV-1	24	TRITC	937.336257628815	180.234481405934	347.717948717949	57.7866423777679	2294.87179487179	601.544362215805	34.5131526761126	33.5850201871524	1471.85774079514	6.66369976898326	5.41259705777252	1471.85774079514	16	13	1.70560573084488
1002004	XAV-2	24	FITC	820.891310355623	243.673070324456	197.807692307692	84.1964461153886	2756.96153846154	731.909364922692	43.154645449155	33.6678993580448	1801.66020946722	10.5894269136368	3.79545499064512	1801.66020946722	9	8.66666666666667	0.516397779494322
1002004	XAV-2	24	TRITC	1002.72888728087	219.355389911274	341.461538461538	59.5168754349425	2481.42307692308	609.65866995078	43.154645449155	33.6678993580448	1801.66020946722	10.5894269136368	3.79545499064512	1801.66020946722	9	8.66666666666667	0.516397779494322
1002005	XAV-2	24	FITC	820.891310355623	243.673070324456	197.807692307692	84.1964461153886	2756.96153846154	731.909364922692	37.8276634123993	33.7736247327651	1635.75622200978	7.29232831043211	9.20445419316226	1635.75622200978	9	8.66666666666667	0.516397779494322
1002005	XAV-2	24	TRITC	1002.72888728087	219.355389911274	341.461538461538	59.5168754349425	2481.42307692308	609.65866995078	37.8276634123993	33.7736247327651	1635.75622200978	7.29232831043211	9.20445419316226	1635.75622200978	9	8.66666666666667	0.516397779494322
1002006	XAV-2	24	FITC	820.891310355623	243.673070324456	197.807692307692	84.1964461153886	2756.96153846154	731.909364922692	38.1807277838168	39.1779702685616	1999.88428259082	9.84833725827092	12.7178338158937	1999.88428259082	8	8.66666666666667	0.516397779494322
1002006	XAV-2	24	TRITC	1002.72888728087	219.355389911274	341.461538461538	59.5168754349425	2481.42307692308	609.65866995078	38.1807277838168	39.1779702685616	1999.88428259082	9.84833725827092	12.7178338158937	1999.88428259082	8	8.66666666666667	0.516397779494322
1028598	C59-1	48	FITC	703.418586312839	277.287892012633	156.464285714286	89.0752832420761	2592.75	974.525891376398	33.7324284610728	31.4246574759935	1352.06100339507	7.19887486521572	6.6741736733516	1352.06100339507	11	9.33333333333333	1.36626010212795
1028598	C59-1	48	TRITC	1310.03432494783	384.291641149833	395.214285714286	126.933449212966	3170.60714285714	821.077762333716	33.7324284610728	31.4246574759935	1352.06100339507	7.19887486521572	6.6741736733516	1352.06100339507	11	9.33333333333333	1.36626010212795
1028599	C59-1	48	FITC	703.418586312839	277.287892012633	156.464285714286	89.0752832420761	2592.75	974.525891376398	43.6595030472645	38.5155060668259	2117.81155610322	10.5410095694431	3.07523461512867	2117.81155610322	8	9.33333333333333	1.36626010212795
1028599	C59-1	48	TRITC	1310.03432494783	384.291641149833	395.214285714286	126.933449212966	3170.60714285714	821.077762333716	43.6595030472645	38.5155060668259	2117.81155610322	10.5410095694431	3.07523461512867	2117.81155610322	8	9.33333333333333	1.36626010212795
1028600	C59-1	48	FITC	703.418586312839	277.287892012633	156.464285714286	89.0752832420761	2592.75	974.525891376398	35.0520279928061	33.4817608090707	1501.69690481223	7.16196903758409	6.22104472280885	1501.69690481223	9	9.33333333333333	1.36626010212795
1028600	C59-1	48	TRITC	1310.03432494783	384.291641149833	395.214285714286	126.933449212966	3170.60714285714	821.077762333716	35.0520279928061	33.4817608090707	1501.69690481223	7.16196903758409	6.22104472280885	1501.69690481223	9	9.33333333333333	1.36626010212795
1028613	C59-2	48	FITC	735.268239032019	270.595814046437	153.4	79.3581605574299	2692.6	820.041505405815	45.5094106213335	39.4171423823792	2294.4808425321	14.6847188282968	6.89216349750672	2294.4808425321	12	11.6666666666667	1.36626010212795
1028613	C59-2	48	TRITC	1340.87914335675	311.255867747738	388.171428571429	94.9890042287514	3309.6	668.905084271831	45.5094106213335	39.4171423823792	2294.4808425321	14.6847188282968	6.89216349750672	2294.4808425321	12	11.6666666666667	1.36626010212795
1028614	C59-2	48	FITC	735.268239032019	270.595814046437	153.4	79.3581605574299	2692.6	820.041505405815	39.5180457129701	38.3252391992103	1944.93113505582	8.99093956228324	8.32255875349556	1944.93113505582	10	11.6666666666667	1.36626010212795
1028614	C59-2	48	TRITC	1340.87914335675	311.255867747738	388.171428571429	94.9890042287514	3309.6	668.905084271831	39.5180457129701	38.3252391992103	1944.93113505582	8.99093956228324	8.32255875349556	1944.93113505582	10	11.6666666666667	1.36626010212795
1028615	C59-2	48	FITC	735.268239032019	270.595814046437	153.4	79.3581605574299	2692.6	820.041505405815	39.2800625459336	35.7936746074344	1881.27821914773	14.2251139406982	9.47220866752842	1881.27821914773	13	11.6666666666667	1.36626010212795
1028615	C59-2	48	TRITC	1340.87914335675	311.255867747738	388.171428571429	94.9890042287514	3309.6	668.905084271831	39.2800625459336	35.7936746074344	1881.27821914773	14.2251139406982	9.47220866752842	1881.27821914773	13	11.6666666666667	1.36626010212795
1028604	PD-100, C59-1	48	FITC	698.727915324566	229.86076061492	149.351351351351	72.0802855680218	2732.56756756757	946.320433766155	30.3474043093356	31.4076128694685	1209.80120060043	5.95697127036445	5.08207053932395	1209.80120060043	11	12.3333333333333	1.03279555898864
1028604	PD-100, C59-1	48	TRITC	968.560223199172	252.26680268354	303.081081081081	74.699166430861	2442.81081081081	753.069343045802	30.3474043093356	31.4076128694685	1209.80120060043	5.95697127036445	5.08207053932395	1209.80120060043	11	12.3333333333333	1.03279555898864
1028605	PD-100, C59-1	48	FITC	698.727915324566	229.86076061492	149.351351351351	72.0802855680218	2732.56756756757	946.320433766155	32.9369033305942	33.8594526398172	1405.35863064947	5.74181353873309	4.54153740952263	1405.35863064947	13	12.3333333333333	1.03279555898864
1028605	PD-100, C59-1	48	TRITC	968.560223199172	252.26680268354	303.081081081081	74.699166430861	2442.81081081081	753.069343045802	32.9369033305942	33.8594526398172	1405.35863064947	5.74181353873309	4.54153740952263	1405.35863064947	13	12.3333333333333	1.03279555898864
1028606	PD-100, C59-1	48	FITC	698.727915324566	229.86076061492	149.351351351351	72.0802855680218	2732.56756756757	946.320433766155	30.7225470620675	31.3448212498833	1222.47936138904	5.65110534518313	4.31416514462097	1222.47936138904	13	12.3333333333333	1.03279555898864
1028606	PD-100, C59-1	48	TRITC	968.560223199172	252.26680268354	303.081081081081	74.699166430861	2442.81081081081	753.069343045802	30.7225470620675	31.3448212498833	1222.47936138904	5.65110534518313	4.31416514462097	1222.47936138904	13	12.3333333333333	1.03279555898864
1028607	PD-100, C59-2	48	FITC	895.507267089608	290.545613476952	226.081081081081	100.027323594433	3185.21621621622	904.297122236539	34.065806044727	37.3355933165765	1583.46676438414	4.09692862023976	6.29989942998545	1583.46676438414	12	12.3333333333333	1.36626010212795
1028607	PD-100, C59-2	48	TRITC	1383.33196931339	299.346534842153	476.081081081081	102.839513152608	3203.24324324324	720.398246550915	34.065806044727	37.3355933165765	1583.46676438414	4.09692862023976	6.29989942998545	1583.46676438414	12	12.3333333333333	1.36626010212795
1028608	PD-100, C59-2	48	FITC	895.507267089608	290.545613476952	226.081081081081	100.027323594433	3185.21621621622	904.297122236539	30.5759846465789	32.5953874197741	1251.61872760376	5.49852452903574	4.48988786678317	1251.61872760376	14	12.3333333333333	1.36626010212795
1028608	PD-100, C59-2	48	TRITC	1383.33196931339	299.346534842153	476.081081081081	102.839513152608	3203.24324324324	720.398246550915	30.5759846465789	32.5953874197741	1251.61872760376	5.49852452903574	4.48988786678317	1251.61872760376	14	12.3333333333333	1.36626010212795
1028609	PD-100, C59-2	48	FITC	895.507267089608	290.545613476952	226.081081081081	100.027323594433	3185.21621621622	904.297122236539	30.2468499298734	30.8287378744867	1188.3337067114	6.04555956866974	4.85031734538375	1188.3337067114	11	12.3333333333333	1.36626010212795
1028609	PD-100, C59-2	48	TRITC	1383.33196931339	299.346534842153	476.081081081081	102.839513152608	3203.24324324324	720.398246550915	30.2468499298734	30.8287378744867	1188.3337067114	6.04555956866974	4.85031734538375	1188.3337067114	11	12.3333333333333	1.36626010212795
1028645	PD-100, XAV-1, A83, LDN	48	FITC	631.909950477159	286.398011991989	121.166666666667	83.0529776796069	2402.95833333333	992.899639359679	40.2133244832357	40.0844363318549	2077.50531326908	8.12487300797917	10.1923423085216	2077.50531326908	9	8	0.894427190999916
1028645	PD-100, XAV-1, A83, LDN	48	TRITC	1053.78186366677	348.463000702418	317.5	100.633212600318	2654.04166666667	910.111673948846	40.2133244832357	40.0844363318549	2077.50531326908	8.12487300797917	10.1923423085216	2077.50531326908	9	8	0.894427190999916
1028646	PD-100, XAV-1, A83, LDN	48	FITC	631.909950477159	286.398011991989	121.166666666667	83.0529776796069	2402.95833333333	992.899639359679	35.4130756055363	33.4759347680312	1500.09877338447	7.37489029499166	4.81394713301232	1500.09877338447	7	8	0.894427190999916
1028646	PD-100, XAV-1, A83, LDN	48	TRITC	1053.78186366677	348.463000702418	317.5	100.633212600318	2654.04166666667	910.111673948846	35.4130756055363	33.4759347680312	1500.09877338447	7.37489029499166	4.81394713301232	1500.09877338447	7	8	0.894427190999916
1028647	PD-100, XAV-1, A83, LDN	48	FITC	631.909950477159	286.398011991989	121.166666666667	83.0529776796069	2402.95833333333	992.899639359679	45.8969565905578	42.6482210631149	2497.749322707	9.77583250405733	6.81416736213135	2497.749322707	8	8	0.894427190999916
1028647	PD-100, XAV-1, A83, LDN	48	TRITC	1053.78186366677	348.463000702418	317.5	100.633212600318	2654.04166666667	910.111673948846	45.8969565905578	42.6482210631149	2497.749322707	9.77583250405733	6.81416736213135	2497.749322707	8	8	0.894427190999916
1028639	PD-100, XAV-1, A83	48	FITC	700.473479557018	256.565007838593	146.677419354839	76.0133265056307	2566.12903225806	870.254742089368	39.0000423571308	35.8847435370082	1753.42223528964	11.6228704211713	6.26026348627257	1753.42223528964	11	10.3333333333333	2.73252020425589
1028639	PD-100, XAV-1, A83	48	TRITC	1166.70727515518	346.704524827405	346.935483870968	92.0362013861469	2922.38709677419	744.258139689868	39.0000423571308	35.8847435370082	1753.42223528964	11.6228704211713	6.26026348627257	1753.42223528964	11	10.3333333333333	2.73252020425589
1028640	PD-100, XAV-1, A83	48	FITC	700.473479557018	256.565007838593	146.677419354839	76.0133265056307	2566.12903225806	870.254742089368	33.4599761091399	32.8706604886846	1374.71548536249	4.91695911793539	4.96090649853419	1374.71548536249	7	10.3333333333333	2.73252020425589
1028640	PD-100, XAV-1, A83	48	TRITC	1166.70727515518	346.704524827405	346.935483870968	92.0362013861469	2922.38709677419	744.258139689868	33.4599761091399	32.8706604886846	1374.71548536249	4.91695911793539	4.96090649853419	1374.71548536249	7	10.3333333333333	2.73252020425589
1028641	PD-100, XAV-1, A83	48	FITC	700.473479557018	256.565007838593	146.677419354839	76.0133265056307	2566.12903225806	870.254742089368	36.8534675101465	36.9348298201685	1763.81274601984	8.40348828332422	8.20812510859273	1763.81274601984	13	10.3333333333333	2.73252020425589
1028641	PD-100, XAV-1, A83	48	TRITC	1166.70727515518	346.704524827405	346.935483870968	92.0362013861469	2922.38709677419	744.258139689868	36.8534675101465	36.9348298201685	1763.81274601984	8.40348828332422	8.20812510859273	1763.81274601984	13	10.3333333333333	2.73252020425589
1028654	PD-100, XAV-2, A83, LDN	48	FITC	730.826835133451	297.650063614597	168.925	93.1217530839916	2463.175	944.880344819195	35.1030652372273	32.5057312021089	1465.37235567742	7.18075162662992	6.68948750291389	1465.37235567742	11	13.3333333333333	2.25092573548455
1028654	PD-100, XAV-2, A83, LDN	48	TRITC	1150.63257156426	334.571997870421	365.8	95.5730892281681	2758.375	785.107233815702	35.1030652372273	32.5057312021089	1465.37235567742	7.18075162662992	6.68948750291389	1465.37235567742	11	13.3333333333333	2.25092573548455
1028655	PD-100, XAV-2, A83, LDN	48	FITC	730.826835133451	297.650063614597	168.925	93.1217530839916	2463.175	944.880344819195	33.2927406611978	29.3578018093153	1247.21506941897	7.55061372582906	6.158370524485	1247.21506941897	16	13.3333333333333	2.25092573548455
1028655	PD-100, XAV-2, A83, LDN	48	TRITC	1150.63257156426	334.571997870421	365.8	95.5730892281681	2758.375	785.107233815702	33.2927406611978	29.3578018093153	1247.21506941897	7.55061372582906	6.158370524485	1247.21506941897	16	13.3333333333333	2.25092573548455
1028656	PD-100, XAV-2, A83, LDN	48	FITC	730.826835133451	297.650063614597	168.925	93.1217530839916	2463.175	944.880344819195	35.7645489839007	33.3339508894499	1488.25790164473	7.82006514321226	5.40045385152025	1488.25790164473	13	13.3333333333333	2.25092573548455
1028656	PD-100, XAV-2, A83, LDN	48	TRITC	1150.63257156426	334.571997870421	365.8	95.5730892281681	2758.375	785.107233815702	35.7645489839007	33.3339508894499	1488.25790164473	7.82006514321226	5.40045385152025	1488.25790164473	13	13.3333333333333	2.25092573548455
1028660	PD-100, XAV-2, A83	48	FITC	703.441605345677	263.220380732171	149.533333333333	73.9759174572128	2545.57777777778	899.633978320903	32.8992004302656	28.4142720592301	1192.39398615294	6.31493803663669	6.09084617005612	1192.39398615294	13	15	2.36643191323985
1028660	PD-100, XAV-2, A83	48	TRITC	1227.03035244815	371.779979730145	383.444444444444	109.979245057576	2828.44444444444	750.092253585443	32.8992004302656	28.4142720592301	1192.39398615294	6.31493803663669	6.09084617005612	1192.39398615294	13	15	2.36643191323985
1028661	PD-100, XAV-2, A83	48	FITC	703.441605345677	263.220380732171	149.533333333333	73.9759174572128	2545.57777777778	899.633978320903	36.8252730496087	38.2769766779926	1783.41970357646	6.63393124360138	5.23481167609179	1783.41970357646	14	15	2.36643191323985
1028661	PD-100, XAV-2, A83	48	TRITC	1227.03035244815	371.779979730145	383.444444444444	109.979245057576	2828.44444444444	750.092253585443	36.8252730496087	38.2769766779926	1783.41970357646	6.63393124360138	5.23481167609179	1783.41970357646	14	15	2.36643191323985
1028662	PD-100, XAV-2, A83	48	FITC	703.441605345677	263.220380732171	149.533333333333	73.9759174572128	2545.57777777778	899.633978320903	32.9029548659322	33.8240255256345	1397.96520434778	6.52211134509525	6.20273401015851	1397.96520434778	18	15	2.36643191323985
1028662	PD-100, XAV-2, A83	48	TRITC	1227.03035244815	371.779979730145	383.444444444444	109.979245057576	2828.44444444444	750.092253585443	32.9029548659322	33.8240255256345	1397.96520434778	6.52211134509525	6.20273401015851	1397.96520434778	18	15	2.36643191323985
1028595	PD-100	48	FITC	577.741361799476	233.872151070209	110.435897435897	71.5776335514895	2389.28205128205	933.857448512914	27.5697818526864	26.5093120127486	921.3853037152	6.54326721079305	2.87768948049869	921.3853037152	16	13	3.22490309931942
1028595	PD-100	48	TRITC	1140.73592904309	350.768692761963	310.897435897436	87.9772084336544	3146.35897435897	879.466868625218	27.5697818526864	26.5093120127486	921.3853037152	6.54326721079305	2.87768948049869	921.3853037152	16	13	3.22490309931942
1028596	PD-100	48	FITC	577.741361799476	233.872151070209	110.435897435897	71.5776335514895	2389.28205128205	933.857448512914	30.2819554169125	26.591314850052	1059.23674249628	12.9120495114922	5.09952540166244	1059.23674249628	9	13	3.22490309931942
1028596	PD-100	48	TRITC	1140.73592904309	350.768692761963	310.897435897436	87.9772084336544	3146.35897435897	879.466868625218	30.2819554169125	26.591314850052	1059.23674249628	12.9120495114922	5.09952540166244	1059.23674249628	9	13	3.22490309931942
1028597	PD-100	48	FITC	577.741361799476	233.872151070209	110.435897435897	71.5776335514895	2389.28205128205	933.857448512914	32.8190620412459	30.5525308328323	1272.13121277789	7.03457813758858	5.65587686996781	1272.13121277789	14	13	3.22490309931942
1028597	PD-100	48	TRITC	1140.73592904309	350.768692761963	310.897435897436	87.9772084336544	3146.35897435897	879.466868625218	32.8190620412459	30.5525308328323	1272.13121277789	7.03457813758858	5.65587686996781	1272.13121277789	14	13	3.22490309931942
1028636	PD-250, C59-1	48	FITC	655.707253688966	254.240035373995	137.64	73.391575356667	2405.08	922.996249540954	26.3801673972108	27.1676501004637	880.926947962869	5.97249518250027	5.30548735197353	880.926947962869	6	8.33333333333333	2.87518115371304
1028636	PD-250, C59-1	48	TRITC	956.123764873765	267.999581206808	274.96	70.0698936776702	2350.88	746.117691788635	26.3801673972108	27.1676501004637	880.926947962869	5.97249518250027	5.30548735197353	880.926947962869	6	8.33333333333333	2.87518115371304
1028637	PD-250, C59-1	48	FITC	655.707253688966	254.240035373995	137.64	73.391575356667	2405.08	922.996249540954	36.2836790452643	33.3529175645634	1510.39665980436	8.16446256302579	3.84983997761012	1510.39665980436	12	8.33333333333333	2.87518115371304
1028637	PD-250, C59-1	48	TRITC	956.123764873765	267.999581206808	274.96	70.0698936776702	2350.88	746.117691788635	36.2836790452643	33.3529175645634	1510.39665980436	8.16446256302579	3.84983997761012	1510.39665980436	12	8.33333333333333	2.87518115371304
1028638	PD-250, C59-1	48	FITC	655.707253688966	254.240035373995	137.64	73.391575356667	2405.08	922.996249540954	36.460739682797	33.5965298694057	1539.55134120705	11.2415295684066	4.36618287350335	1539.55134120705	7	8.33333333333333	2.87518115371304
1028638	PD-250, C59-1	48	TRITC	956.123764873765	267.999581206808	274.96	70.0698936776702	2350.88	746.117691788635	36.460739682797	33.5965298694057	1539.55134120705	11.2415295684066	4.36618287350335	1539.55134120705	7	8.33333333333333	2.87518115371304
1028663	PD-250, C59-2	48	FITC	740.616143007213	237.738169680087	182.571428571429	81.8681697153635	2551.02380952381	773.360468380319	33.4545917997019	33.5201151872381	1429.00248845192	7.16681977960983	6.30235770578041	1429.00248845192	13	14	2.36643191323985
1028663	PD-250, C59-2	48	TRITC	1081.62300528762	296.892473609694	348.5	101.406030031893	2597.04761904762	761.498553155295	33.4545917997019	33.5201151872381	1429.00248845192	7.16681977960983	6.30235770578041	1429.00248845192	13	14	2.36643191323985
1028664	PD-250, C59-2	48	FITC	740.616143007213	237.738169680087	182.571428571429	81.8681697153635	2551.02380952381	773.360468380319	30.5545331350803	26.9362158603222	1056.43778032873	6.32210890178274	5.23814563621067	1056.43778032873	12	14	2.36643191323985
1028664	PD-250, C59-2	48	TRITC	1081.62300528762	296.892473609694	348.5	101.406030031893	2597.04761904762	761.498553155295	30.5545331350803	26.9362158603222	1056.43778032873	6.32210890178274	5.23814563621067	1056.43778032873	12	14	2.36643191323985
1028665	PD-250, C59-2	48	FITC	740.616143007213	237.738169680087	182.571428571429	81.8681697153635	2551.02380952381	773.360468380319	30.2745965505136	27.0075832684554	1078.67327352905	10.5390310522214	5.93755110036018	1078.67327352905	17	14	2.36643191323985
1028665	PD-250, C59-2	48	TRITC	1081.62300528762	296.892473609694	348.5	101.406030031893	2597.04761904762	761.498553155295	30.2745965505136	27.0075832684554	1078.67327352905	10.5390310522214	5.93755110036018	1078.67327352905	17	14	2.36643191323985
1028648	PD-250, XAV-1, A83, LDN	48	FITC	743.509578239472	283.166661023243	157.2	94.9179470209226	3003.56	954.787938060943	36.0904430915891	34.4628356571151	1596.1424116086	8.04595309164625	6.66214324772618	1596.1424116086	7	8.33333333333333	1.36626010212795
1028648	PD-250, XAV-1, A83, LDN	48	TRITC	1111.58547528298	294.222951747818	332.28	75.955864377501	2826.2	879.471005775631	36.0904430915891	34.4628356571151	1596.1424116086	8.04595309164625	6.66214324772618	1596.1424116086	7	8.33333333333333	1.36626010212795
1028649	PD-250, XAV-1, A83, LDN	48	FITC	743.509578239472	283.166661023243	157.2	94.9179470209226	3003.56	954.787938060943	33.9297269391024	33.2730221696165	1424.24895900159	5.52858101331409	9.25273649986561	1424.24895900159	8	8.33333333333333	1.36626010212795
1028649	PD-250, XAV-1, A83, LDN	48	TRITC	1111.58547528298	294.222951747818	332.28	75.955864377501	2826.2	879.471005775631	33.9297269391024	33.2730221696165	1424.24895900159	5.52858101331409	9.25273649986561	1424.24895900159	8	8.33333333333333	1.36626010212795
1028650	PD-250, XAV-1, A83, LDN	48	FITC	743.509578239472	283.166661023243	157.2	94.9179470209226	3003.56	954.787938060943	33.7823968807254	32.5028365360367	1396.58812467915	6.31978567511344	4.76498375057272	1396.58812467915	10	8.33333333333333	1.36626010212795
1028650	PD-250, XAV-1, A83, LDN	48	TRITC	1111.58547528298	294.222951747818	332.28	75.955864377501	2826.2	879.471005775631	33.7823968807254	32.5028365360367	1396.58812467915	6.31978567511344	4.76498375057272	1396.58812467915	10	8.33333333333333	1.36626010212795
1028642	PD-250, XAV-1, A83	48	FITC	644.185413021957	260.298900958043	123.84375	71.2388573630087	2345.75	825.093386698859	38.2805204055731	35.1744246737689	1827.32860720386	14.2975450558516	11.6609784107577	1827.32860720386	12	10.6666666666667	2.06559111797729
1028642	PD-250, XAV-1, A83	48	TRITC	1063.32179980113	329.392625981294	335.5	100.193683401442	2573.46875	803.761278328536	38.2805204055731	35.1744246737689	1827.32860720386	14.2975450558516	11.6609784107577	1827.32860720386	12	10.6666666666667	2.06559111797729
1028643	PD-250, XAV-1, A83	48	FITC	644.185413021957	260.298900958043	123.84375	71.2388573630087	2345.75	825.093386698859	37.5180022891087	34.3095060391438	1664.16713621385	8.33685864697703	7.56553113077199	1664.16713621385	12	10.6666666666667	2.06559111797729
1028643	PD-250, XAV-1, A83	48	TRITC	1063.32179980113	329.392625981294	335.5	100.193683401442	2573.46875	803.761278328536	37.5180022891087	34.3095060391438	1664.16713621385	8.33685864697703	7.56553113077199	1664.16713621385	12	10.6666666666667	2.06559111797729
1028644	PD-250, XAV-1, A83	48	FITC	644.185413021957	260.298900958043	123.84375	71.2388573630087	2345.75	825.093386698859	38.9166450177495	34.5306842723195	1692.36480422977	6.44029517001019	4.18761597517788	1692.36480422977	8	10.6666666666667	2.06559111797729
1028644	PD-250, XAV-1, A83	48	TRITC	1063.32179980113	329.392625981294	335.5	100.193683401442	2573.46875	803.761278328536	38.9166450177495	34.5306842723195	1692.36480422977	6.44029517001019	4.18761597517788	1692.36480422977	8	10.6666666666667	2.06559111797729
1028651	PD-250, XAV-2, A83, LDN	48	FITC	777.056031778356	281.84118962096	178.76	89.4409861305207	2774	858.317637396941	33.6605911991632	29.378361107013	1225.13378145705	6.60289446340892	5.56504887602827	1225.13378145705	7	8.33333333333333	1.03279555898864
1028651	PD-250, XAV-2, A83, LDN	48	TRITC	1091.34685349811	291.878668716294	316.16	68.488247166941	2648.4	742.668555503283	33.6605911991632	29.378361107013	1225.13378145705	6.60289446340892	5.56504887602827	1225.13378145705	7	8.33333333333333	1.03279555898864
1028652	PD-250, XAV-2, A83, LDN	48	FITC	777.056031778356	281.84118962096	178.76	89.4409861305207	2774	858.317637396941	30.893207495226	29.8256791647213	1152.13784507512	4.12773528240737	3.19211341570166	1152.13784507512	9	8.33333333333333	1.03279555898864
1028652	PD-250, XAV-2, A83, LDN	48	TRITC	1091.34685349811	291.878668716294	316.16	68.488247166941	2648.4	742.668555503283	30.893207495226	29.8256791647213	1152.13784507512	4.12773528240737	3.19211341570166	1152.13784507512	9	8.33333333333333	1.03279555898864
1028653	PD-250, XAV-2, A83, LDN	48	FITC	777.056031778356	281.84118962096	178.76	89.4409861305207	2774	858.317637396941	37.2039383045691	35.9455724487775	1683.65465664445	7.79516390793837	4.62534767861389	1683.65465664445	9	8.33333333333333	1.03279555898864
1028653	PD-250, XAV-2, A83, LDN	48	TRITC	1091.34685349811	291.878668716294	316.16	68.488247166941	2648.4	742.668555503283	37.2039383045691	35.9455724487775	1683.65465664445	7.79516390793837	4.62534767861389	1683.65465664445	9	8.33333333333333	1.03279555898864
1028657	PD-250, XAV-2, A83	48	FITC	690.197307624663	279.996499869175	163.510204081633	91.2085801996765	2372.32653061224	837.193684971681	41.1599981307983	39.3050010681152	2052.5919775333	5.44242715189685	10.3849356713172	2052.5919775333	16	16.3333333333333	0.516397779494322
1028657	PD-250, XAV-2, A83	48	TRITC	1202.63161715201	327.351148629949	391.326530612245	93.133950969178	2742.0612244898	771.81394584887	41.1599981307983	39.3050010681152	2052.5919775333	5.44242715189685	10.3849356713172	2052.5919775333	16	16.3333333333333	0.516397779494322
1028658	PD-250, XAV-2, A83	48	FITC	690.197307624663	279.996499869175	163.510204081633	91.2085801996765	2372.32653061224	837.193684971681	30.3840588929653	28.4342872007561	1084.76668529848	4.74110341999339	4.49502844885187	1084.76668529848	17	16.3333333333333	0.516397779494322
1028658	PD-250, XAV-2, A83	48	TRITC	1202.63161715201	327.351148629949	391.326530612245	93.133950969178	2742.0612244898	771.81394584887	30.3840588929653	28.4342872007561	1084.76668529848	4.74110341999339	4.49502844885187	1084.76668529848	17	16.3333333333333	0.516397779494322
1028659	PD-250, XAV-2, A83	48	FITC	690.197307624663	279.996499869175	163.510204081633	91.2085801996765	2372.32653061224	837.193684971681	31.0668836502427	31.1113230768187	1228.19497580143	4.84106006846378	5.68499718542132	1228.19497580143	16	16.3333333333333	0.516397779494322
1028659	PD-250, XAV-2, A83	48	TRITC	1202.63161715201	327.351148629949	391.326530612245	93.133950969178	2742.0612244898	771.81394584887	31.0668836502427	31.1113230768187	1228.19497580143	4.84106006846378	5.68499718542132	1228.19497580143	16	16.3333333333333	0.516397779494322
1028616	PD-250	48	FITC	689.220860938875	330.175614692562	154.75	101.377777168883	2416.03571428571	1045.99523694627	26.5984274717886	27.615859431002	919.214962345256	4.75779827406928	2.7414897682174	919.214962345256	9	9.33333333333333	1.36626010212795
1028616	PD-250	48	TRITC	1265.47965942754	445.062518337868	333.785714285714	82.9253824086392	3153.42857142857	871.673207053067	26.5984274717886	27.615859431002	919.214962345256	4.75779827406928	2.7414897682174	919.214962345256	9	9.33333333333333	1.36626010212795
1028617	PD-250	48	FITC	689.220860938875	330.175614692562	154.75	101.377777168883	2416.03571428571	1045.99523694627	29.298498980436	26.8281787449059	993.469959652019	5.35469843392232	6.02310241884	993.469959652019	11	9.33333333333333	1.36626010212795
1028617	PD-250	48	TRITC	1265.47965942754	445.062518337868	333.785714285714	82.9253824086392	3153.42857142857	871.673207053067	29.298498980436	26.8281787449059	993.469959652019	5.35469843392232	6.02310241884	993.469959652019	11	9.33333333333333	1.36626010212795
1028618	PD-250	48	FITC	689.220860938875	330.175614692562	154.75	101.377777168883	2416.03571428571	1045.99523694627	32.1709979422455	27.6392235810506	1134.38785378997	12.3722942352892	4.68434817466584	1134.38785378997	8	9.33333333333333	1.36626010212795
1028618	PD-250	48	TRITC	1265.47965942754	445.062518337868	333.785714285714	82.9253824086392	3153.42857142857	871.673207053067	32.1709979422455	27.6392235810506	1134.38785378997	12.3722942352892	4.68434817466584	1134.38785378997	8	9.33333333333333	1.36626010212795
1028601	XAV-1	48	FITC	680.060610545291	253.143860854066	149.28125	84.5226575368805	2481.65625	1023.87561017976	31.5624872755496	32.3043173187112	1336.21072824768	8.18314625851137	8.39402289989675	1336.21072824768	10	10.6666666666667	1.03279555898864
1028601	XAV-1	48	TRITC	1220.76804673142	361.98665704262	356.8125	76.1070712241811	3075.125	920.350099935678	31.5624872755496	32.3043173187112	1336.21072824768	8.18314625851137	8.39402289989675	1336.21072824768	10	10.6666666666667	1.03279555898864
1028602	XAV-1	48	FITC	680.060610545291	253.143860854066	149.28125	84.5226575368805	2481.65625	1023.87561017976	32.3341794892294	34.41000308969	1391.83454384385	4.01463000251871	3.65438525907572	1391.83454384385	12	10.6666666666667	1.03279555898864
1028602	XAV-1	48	TRITC	1220.76804673142	361.98665704262	356.8125	76.1070712241811	3075.125	920.350099935678	32.3341794892294	34.41000308969	1391.83454384385	4.01463000251871	3.65438525907572	1391.83454384385	12	10.6666666666667	1.03279555898864
1028603	XAV-1	48	FITC	680.060610545291	253.143860854066	149.28125	84.5226575368805	2481.65625	1023.87561017976	35.3642875894413	36.2477077717553	1619.13132933181	4.53745747083598	5.17562941383837	1619.13132933181	10	10.6666666666667	1.03279555898864
1028603	XAV-1	48	TRITC	1220.76804673142	361.98665704262	356.8125	76.1070712241811	3075.125	920.350099935678	35.3642875894413	36.2477077717553	1619.13132933181	4.53745747083598	5.17562941383837	1619.13132933181	10	10.6666666666667	1.03279555898864
1028610	XAV-2	48	FITC	718.348840266552	270.513990388015	179.243243243243	103.682047467085	2273.13513513513	774.438225144243	27.4657214782613	28.86220764145	994.547866314591	3.35474082044106	3.13531167415065	994.547866314591	13	12.3333333333333	2.73252020425589
1028610	XAV-2	48	TRITC	1377.03120426297	367.029323088162	437.351351351351	96.0162648884194	3208.21621621622	789.846086804791	27.4657214782613	28.86220764145	994.547866314591	3.35474082044106	3.13531167415065	994.547866314591	13	12.3333333333333	2.73252020425589
1028611	XAV-2	48	FITC	718.348840266552	270.513990388015	179.243243243243	103.682047467085	2273.13513513513	774.438225144243	32.1043118104254	31.5817430113441	1309.66833659595	9.10783092271413	8.50224506238388	1309.66833659595	15	12.3333333333333	2.73252020425589
1028611	XAV-2	48	TRITC	1377.03120426297	367.029323088162	437.351351351351	96.0162648884194	3208.21621621622	789.846086804791	32.1043118104254	31.5817430113441	1309.66833659595	9.10783092271413	8.50224506238388	1309.66833659595	15	12.3333333333333	2.73252020425589
1028612	XAV-2	48	FITC	718.348840266552	270.513990388015	179.243243243243	103.682047467085	2273.13513513513	774.438225144243	28.351947593424	29.4101419334554	1054.38120433033	3.57867602448952	4.60642809508334	1054.38120433033	9	12.3333333333333	2.73252020425589
1028612	XAV-2	48	TRITC	1377.03120426297	367.029323088162	437.351351351351	96.0162648884194	3208.21621621622	789.846086804791	28.351947593424	29.4101419334554	1054.38120433033	3.57867602448952	4.60642809508334	1054.38120433033	9	12.3333333333333	2.73252020425589
